# Supplementary material
Source: PubMed Central journal article supplement (PMC2570649)
Supplement: NIHMS64164-supplement-2File001.pdf [file NIHMS64164-supplement-2File001.pdf]

## Internal Azomethine Ylide Cycloaddition Methodology for Access to the Substitution Pattern of Aziridinomitosenone A

Drew R. Bobeck, Don L. Warner and Edwin Vedejs\*

Department of Chemistry, University of Michigan, Ann Arbor Michigan, 48109

### Supporting Information

|                                                                                                                                                                                     |            |
|-------------------------------------------------------------------------------------------------------------------------------------------------------------------------------------|------------|
| ( <i>E</i> )-methyl 2-methoxy-3-(trifluoromethylsulfonyloxy)but-2-enoate ( <b>14</b> ).....                                                                                         | S-3, S-4   |
| ( <i>E</i> )-methyl 2-methoxy-3-(2-phenyloxazol-5-yl)but-2-enoate ( <b>21</b> ).....                                                                                                | S-5, S-6   |
| ( <i>E</i> )-2-methoxy-3-(2-phenyloxazol-5-yl)but-2-en-1-ol ( <b>22</b> ).....                                                                                                      | S-7, S-8   |
| ( <i>E</i> )-2-methoxy-3-(2-phenyloxazol-5-yl)but-2-enal ( <b>23</b> ).....                                                                                                         | S-9, S-10  |
| ( <i>E</i> )-5-(4,7-bis( <i>tert</i> -butyldimethylsilyloxy)-3-methoxyhept-2-en-5-yn-2-yl)-2-phenyloxazole ( <b>25</b> ).....                                                       | S-11, S-12 |
| ( <i>E</i> )-7-( <i>tert</i> -butyldimethylsilyloxy)-3-methoxy-2-(2-phenyloxazol-5-yl)hept-2-en-5-yn-4-one ( <b>26</b> ).....                                                       | S-13, S-14 |
| 4-( <i>tert</i> -butyldimethylsilyloxy)-3-(( <i>tert</i> -butyldimethylsilyloxy)methyl)-5-methoxy-1,6-dimethyl-<br>2-phenyl-1 <i>H</i> -indol-7(4 <i>H</i> )-one ( <b>32</b> )..... | S-15, S-16 |
| 3-( <i>tert</i> -butoxymethyl)-5-methoxy-1,6-dimethyl-2-phenyl-1 <i>H</i> -indole-4,7-dione ( <b>31</b> ).....                                                                      | S-17, S-18 |
| 3-(hydroxymethyl)-5-methoxy-1,6-dimethyl-2-phenyl-1 <i>H</i> -indole-4,7-dione ( <b>34</b> ).....                                                                                   | S-19, S-20 |
| amino alcohol <b>37</b> .....                                                                                                                                                       | S-21, S-22 |
| 2-[(2 <i>S</i> ,3 <i>R</i> )-3-allyloxymethyl-1-trityl-aziridin-2-yl] oxazole ( <b>38</b> ).....                                                                                    | S-23, S-24 |

|                                                                                                                                                                                                                 |            |
|-----------------------------------------------------------------------------------------------------------------------------------------------------------------------------------------------------------------|------------|
| (2 <i>S</i> ,3 <i>R</i> )-2-(oxazol-2-yl)-3-hydroxymethyl-1-tritylaziridine.....                                                                                                                                | S-25, S-26 |
| (2 <i>S</i> ,3 <i>R</i> )-2-(oxazol-2-yl)-3-iodomethyl-1-tritylaziridine ( <b>12</b> ).....                                                                                                                     | S-27, S-28 |
| ( <i>E</i> )-methyl 3-(2-((2 <i>S</i> ,3 <i>R</i> )-3-(iodomethyl)-1-tritylaziridin-2-yl)oxazol-5-yl)-2-methoxybut-2-enoate ( <b>40</b> ).....                                                                  | S-29, S-30 |
| ( <i>E</i> )-3-(2-((2 <i>S</i> ,3 <i>R</i> )-3-(iodomethyl)-1-tritylaziridin-2-yl)oxazol-5-yl)-2-methoxybut-2-enal ( <b>11</b> ).....                                                                           | S-31, S-32 |
| cycloaddition precursor ( <i>E</i> )-7-( <i>tert</i> -butyldimethylsilyloxy)-2-(2-((2 <i>S</i> ,3 <i>R</i> )-3-(iodomethyl)-1-tritylaziridin-2-yl)oxazol-5-yl)-3-methoxyhept-2-en-5-yn-4-one ( <b>43</b> )..... | S-33, S-34 |
| indoloquinone cycloadduct <b>45</b> .....                                                                                                                                                                       | S-35, S-36 |
| cycloaddition precursor 5-(( <i>E</i> )-4,7-bis( <i>tert</i> -butyldimethylsilyloxy)-3-methoxyhept-2-en-5-yn-2-yl)-2-((2 <i>S</i> ,3 <i>R</i> )-3-(iodomethyl)-1-tritylaziridin-2-yl)oxazole ( <b>46</b> )..... | S-37, S-38 |
| cycloaddition; cyanide addition product <b>50</b> .....                                                                                                                                                         | S-39, S-40 |
| cyanide-containing cycloadduct <b>53</b> (major component in mixture with <b>49</b> ).....                                                                                                                      | S-41       |
| desilylated indoloquinone <b>54</b> .....                                                                                                                                                                       | S-42, S-43 |
| hydroxylated cyanide-containing quinone <b>55</b> .....                                                                                                                                                         | S-44, S-45 |
| (1 <i>S</i> , 2, <i>S</i> )-9-carbamoyloxymethyl-2,3-dihydro-7-methoxy-6-methyl-1,2-( <i>N</i> -tritylaziridino)-1 <i>H</i> -pyrrolo[1,2- <i>a</i> ]indole ( <b>57</b> ).....                                   | S-47       |
| amino alcohol <b>59</b> from aziridine cleavage and deprotection.....                                                                                                                                           | S-48       |
| X-Ray structure of <b>55</b> and data tables .....                                                                                                                                                              | S-49,S-59  |

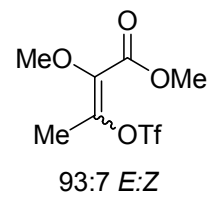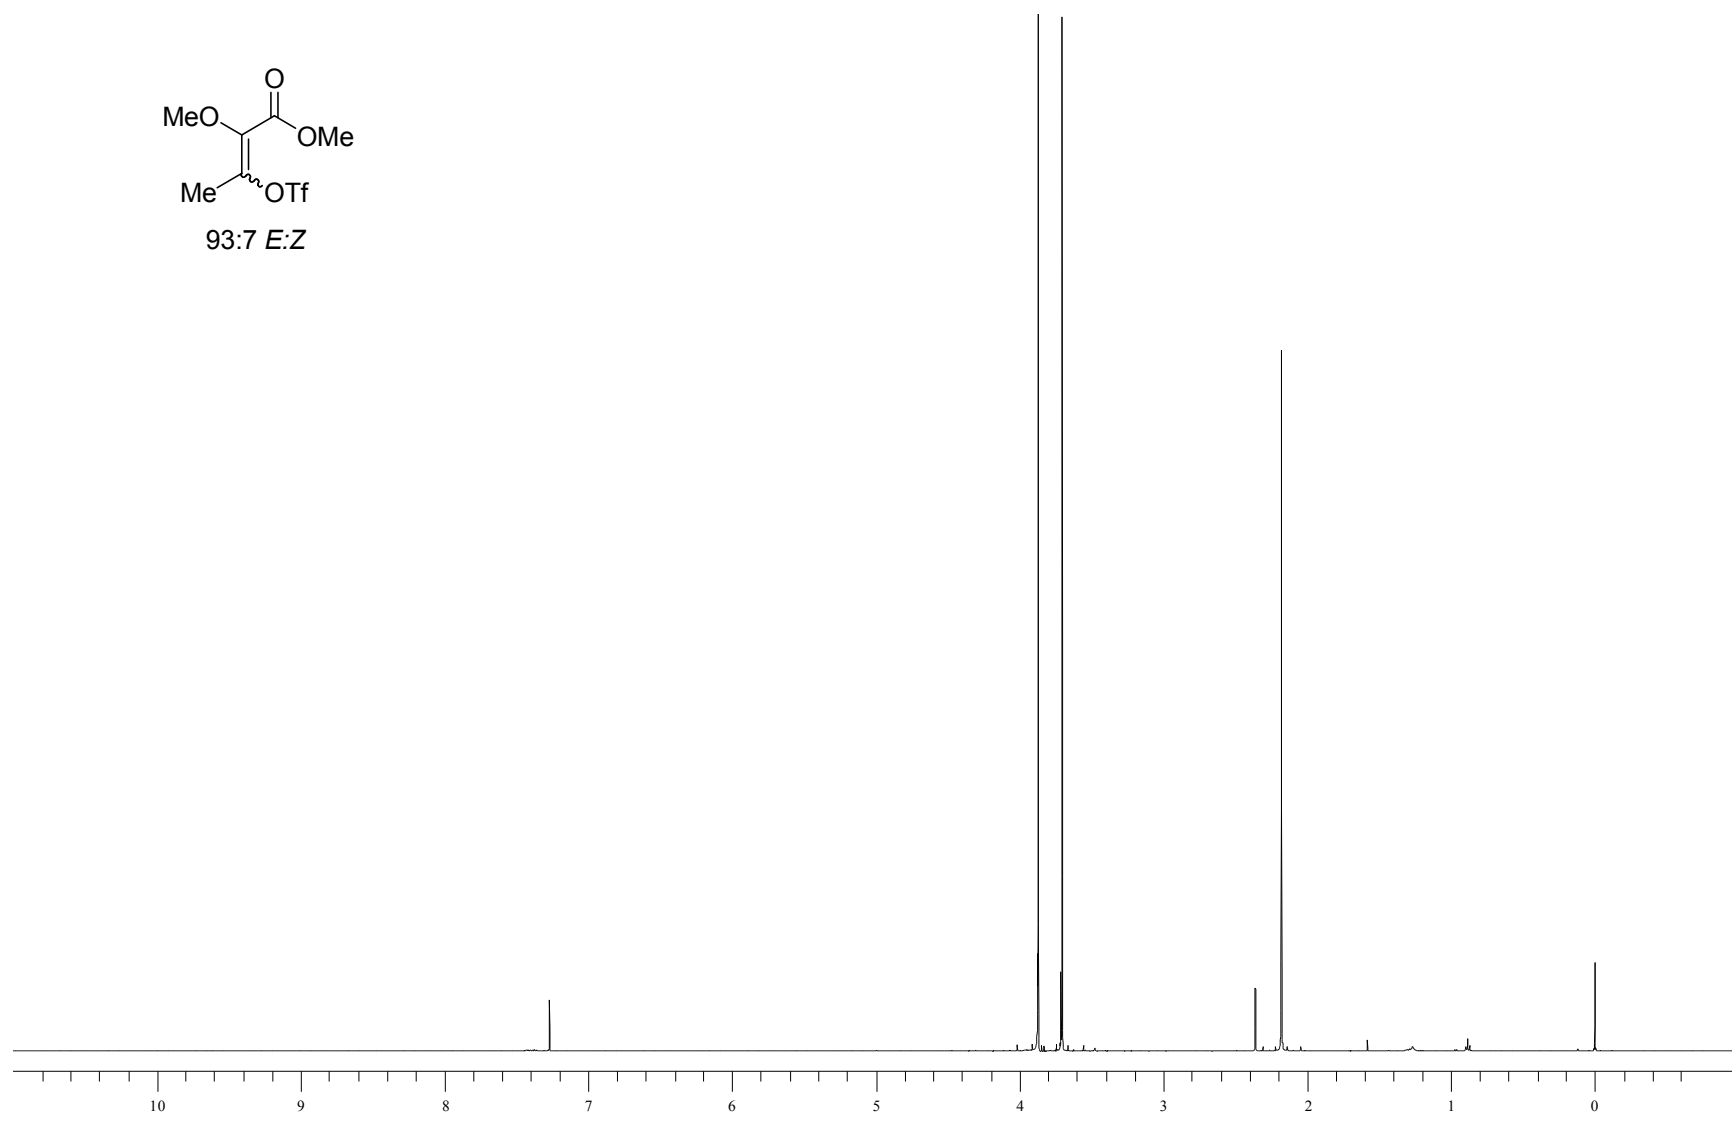

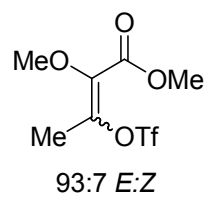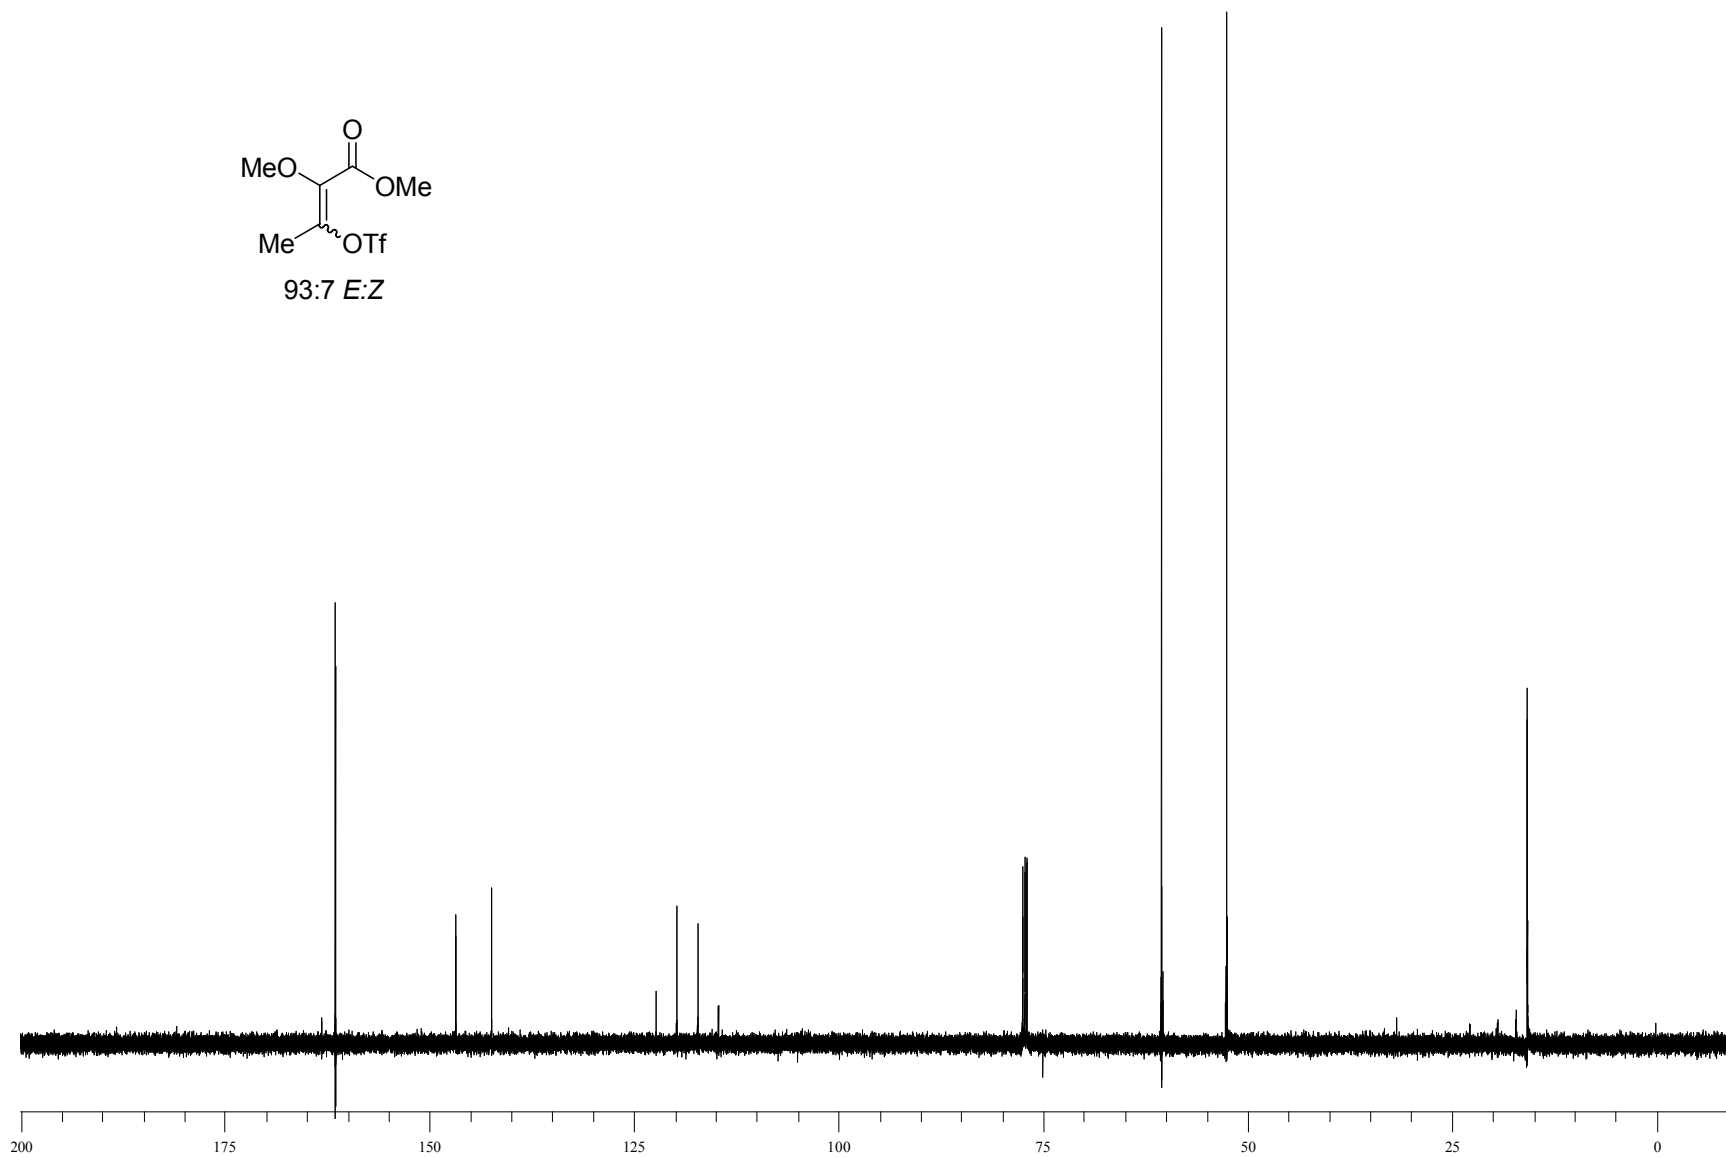

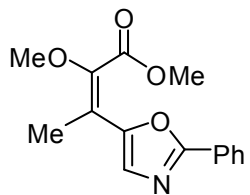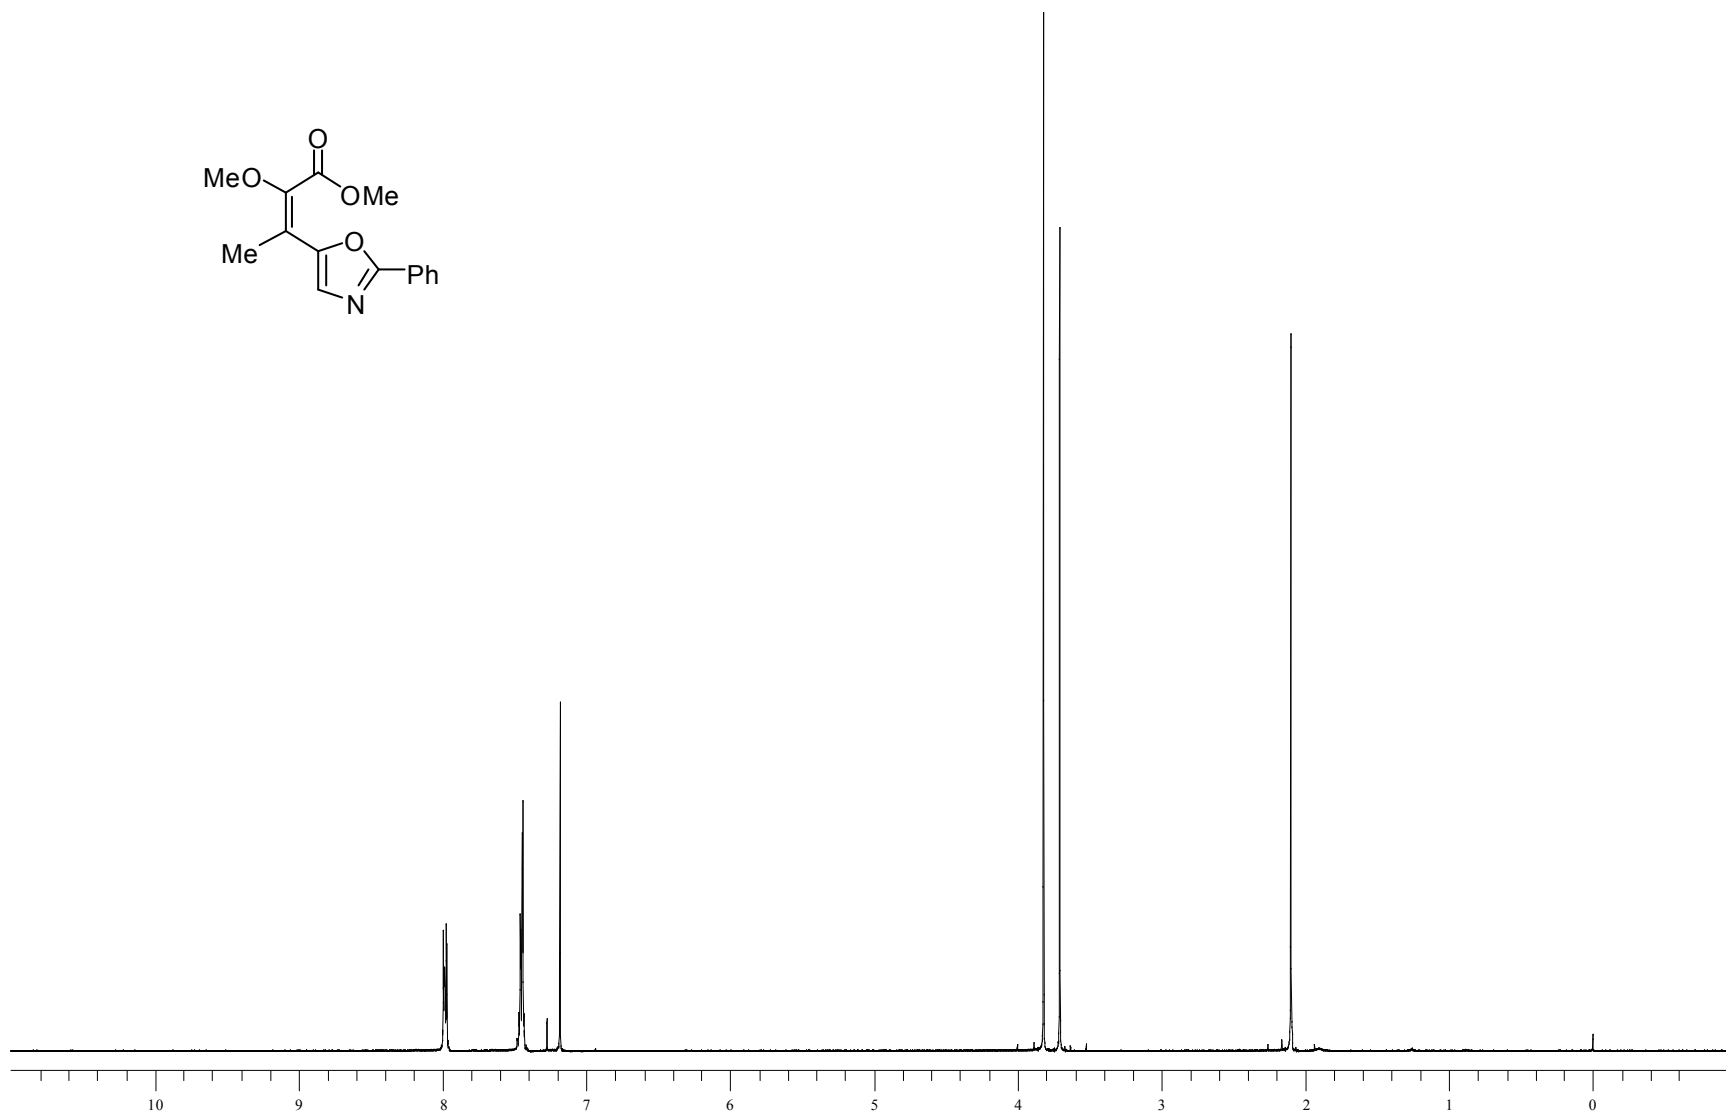

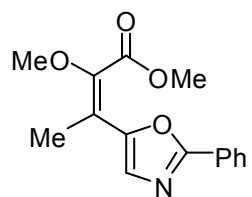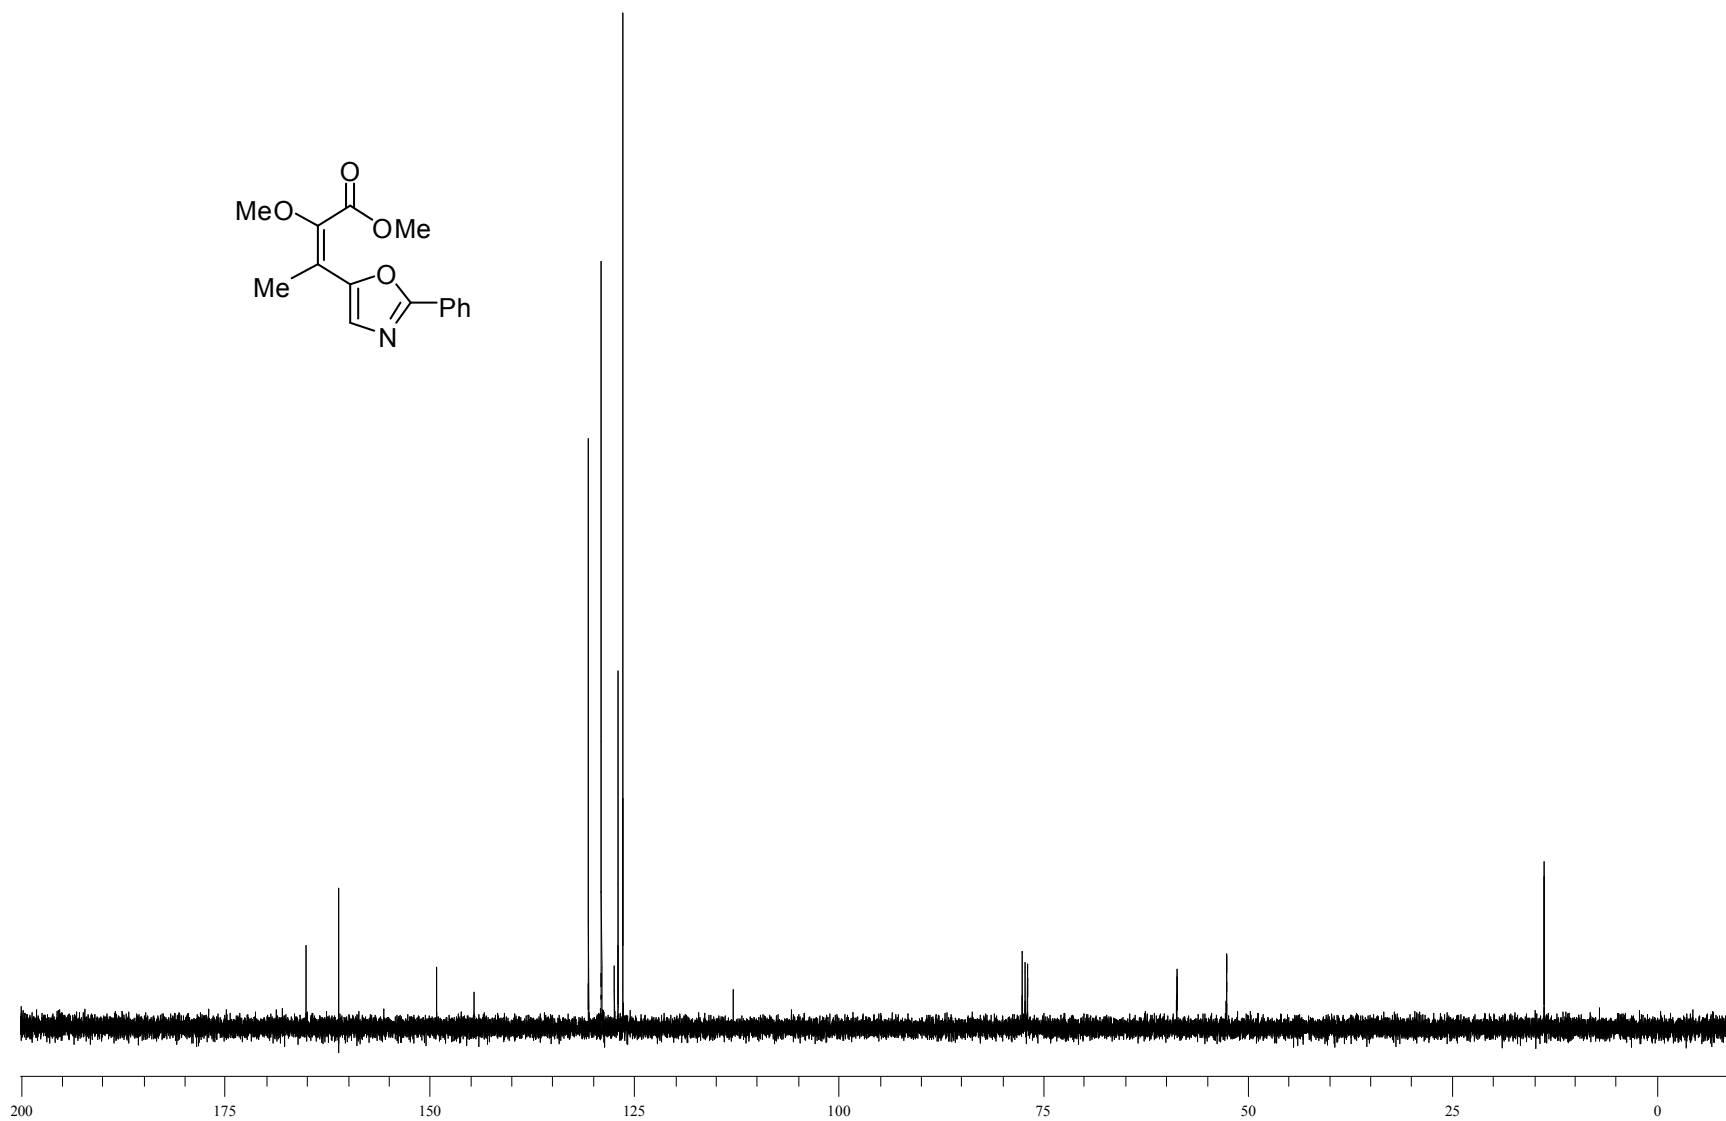

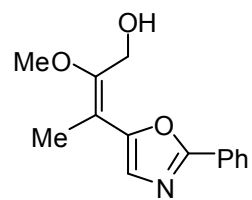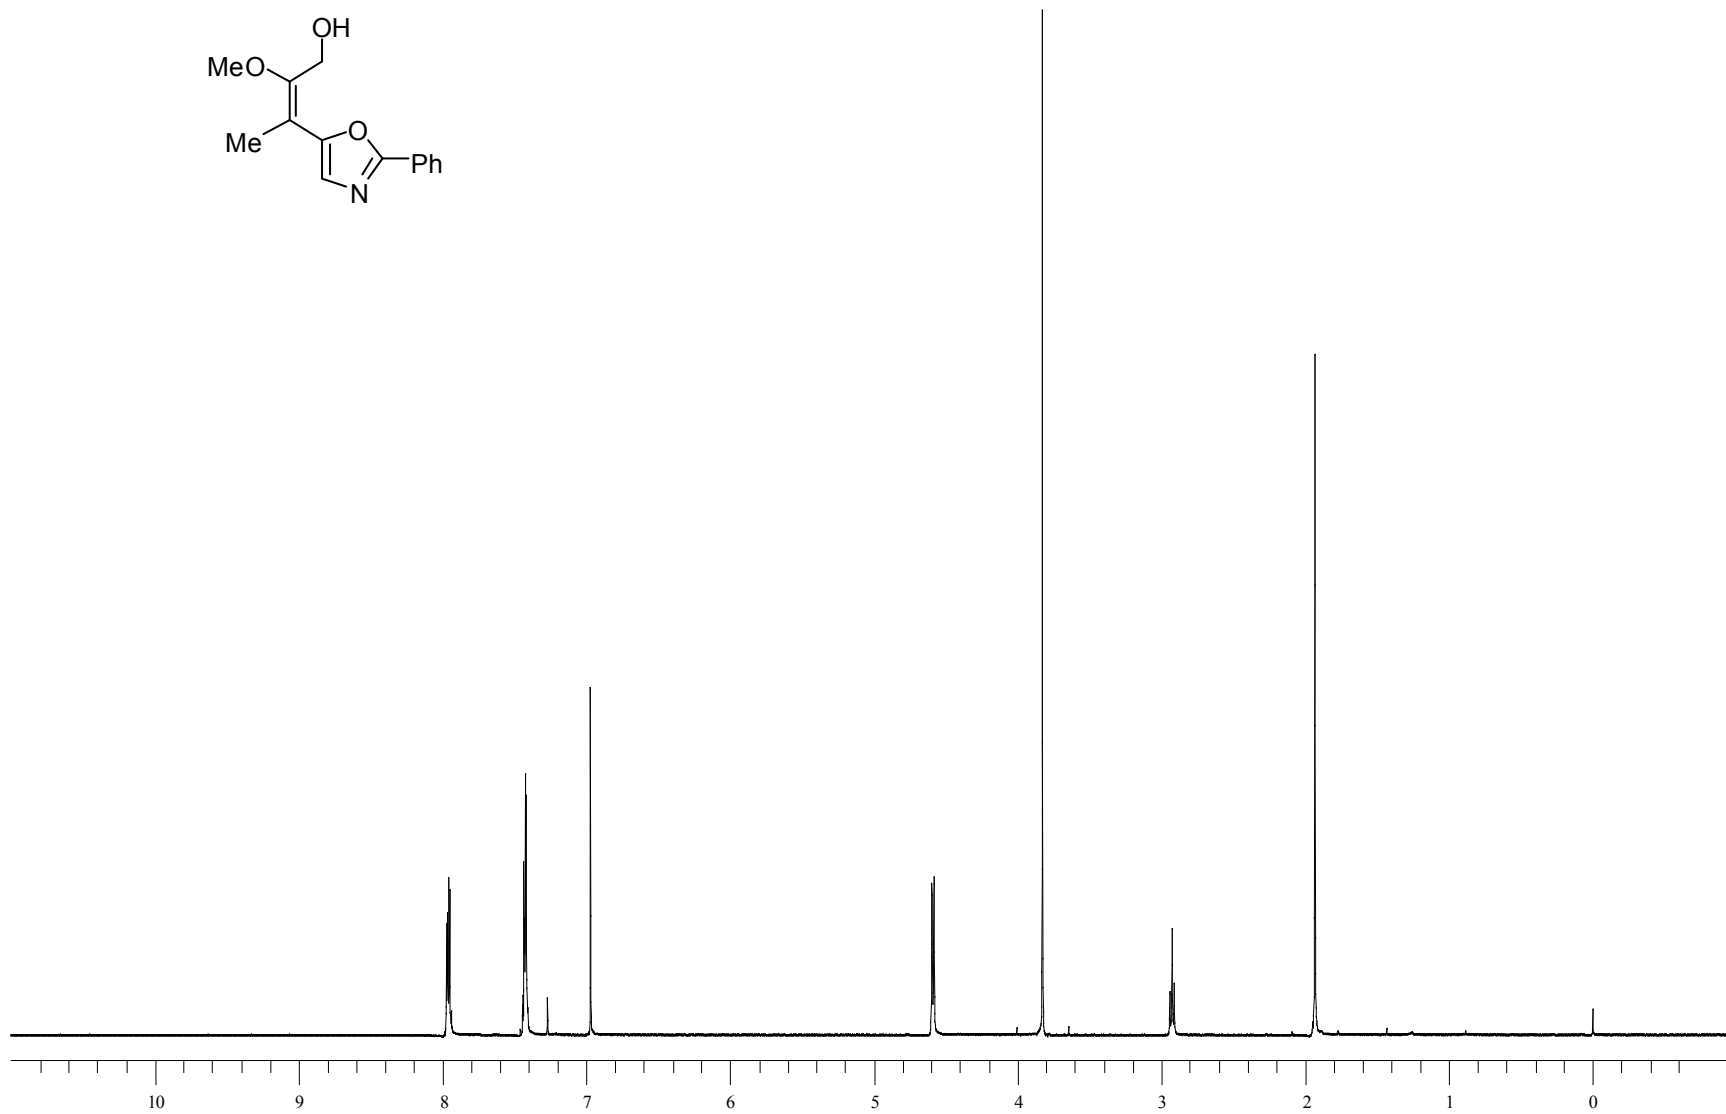

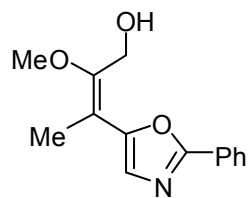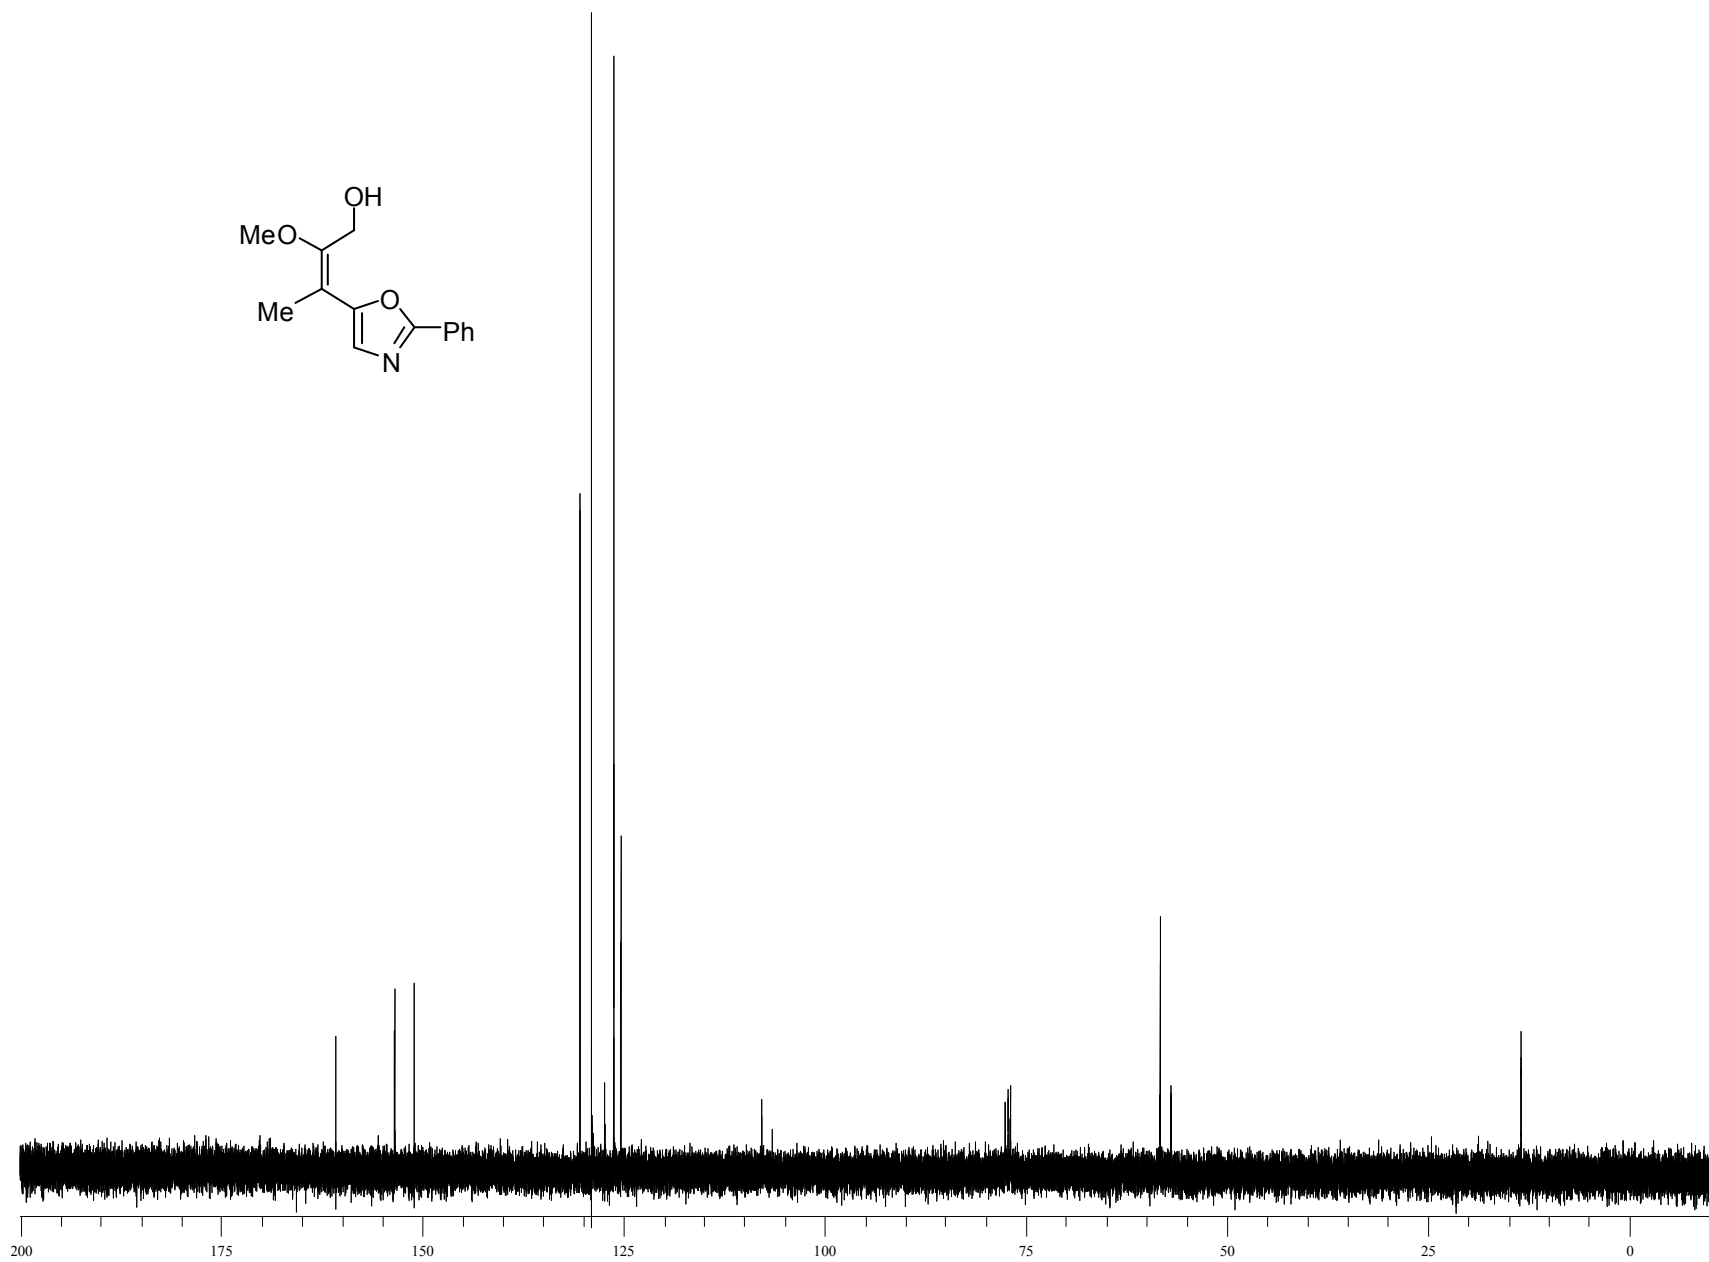



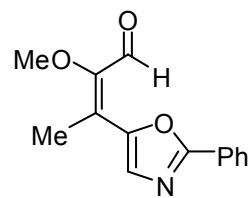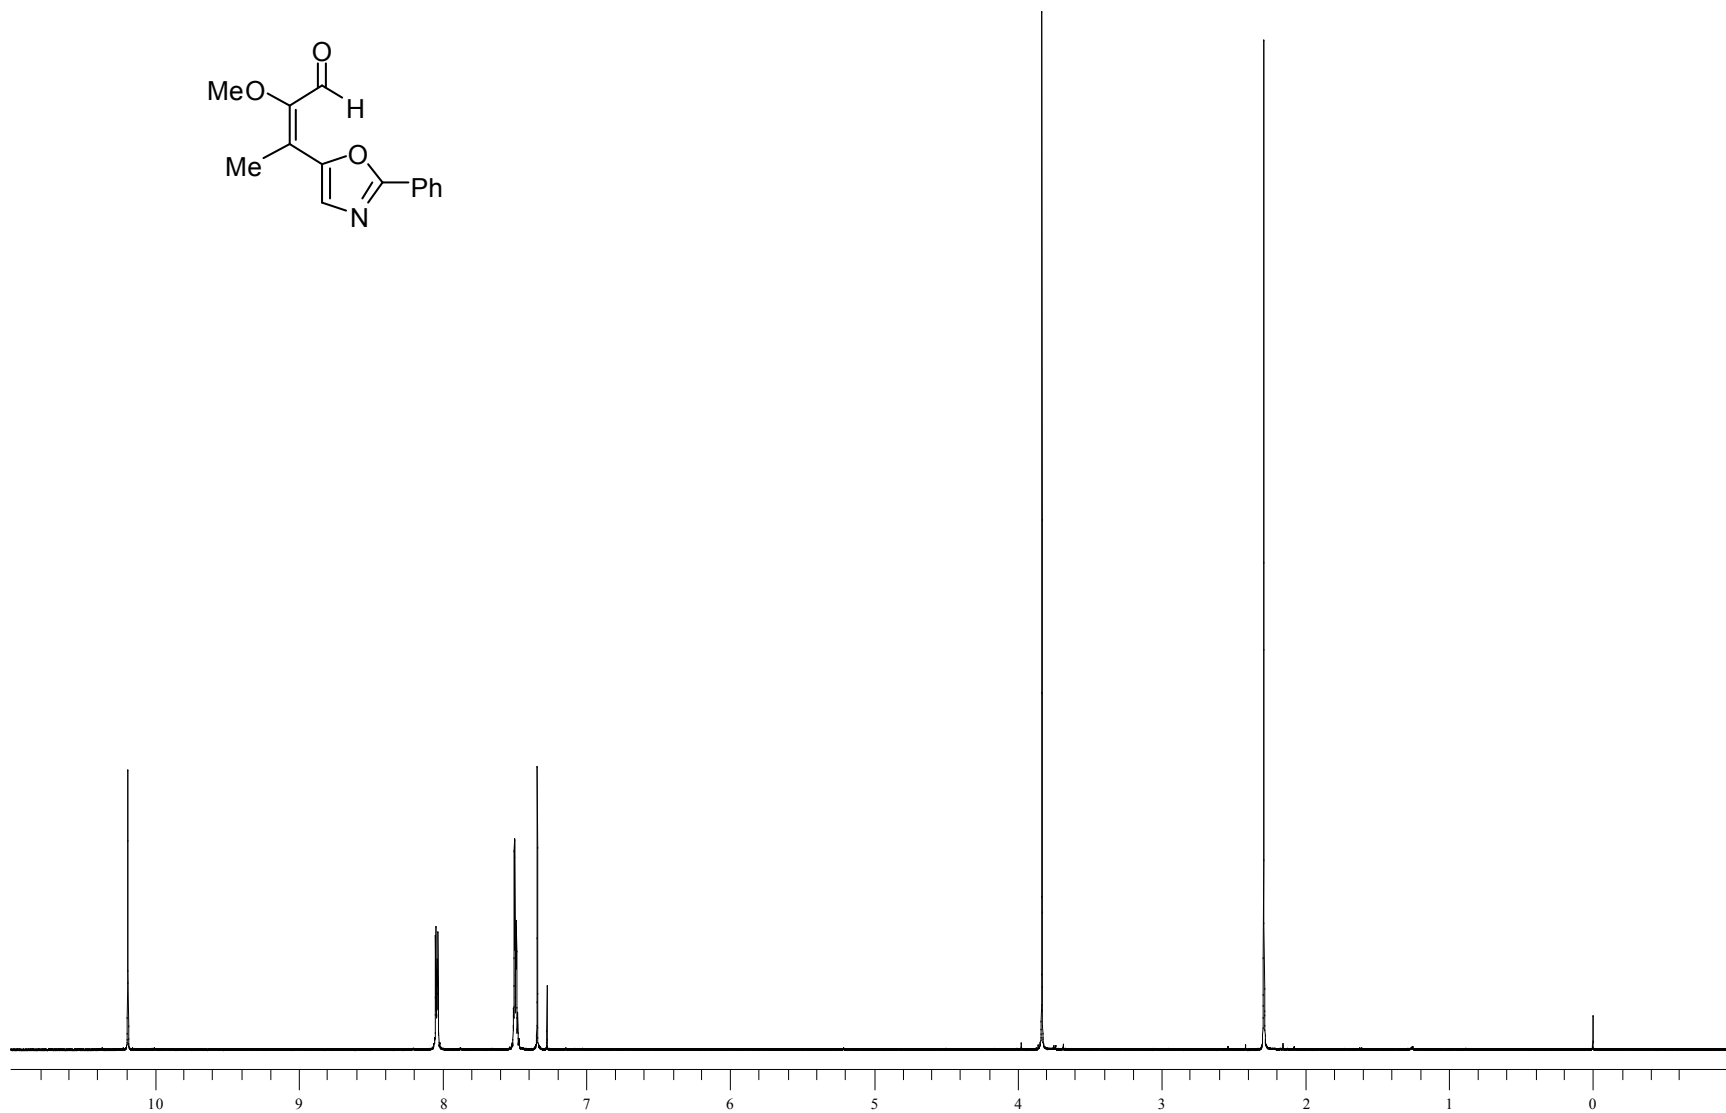

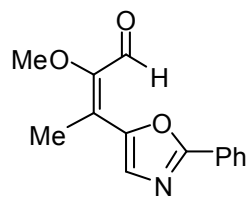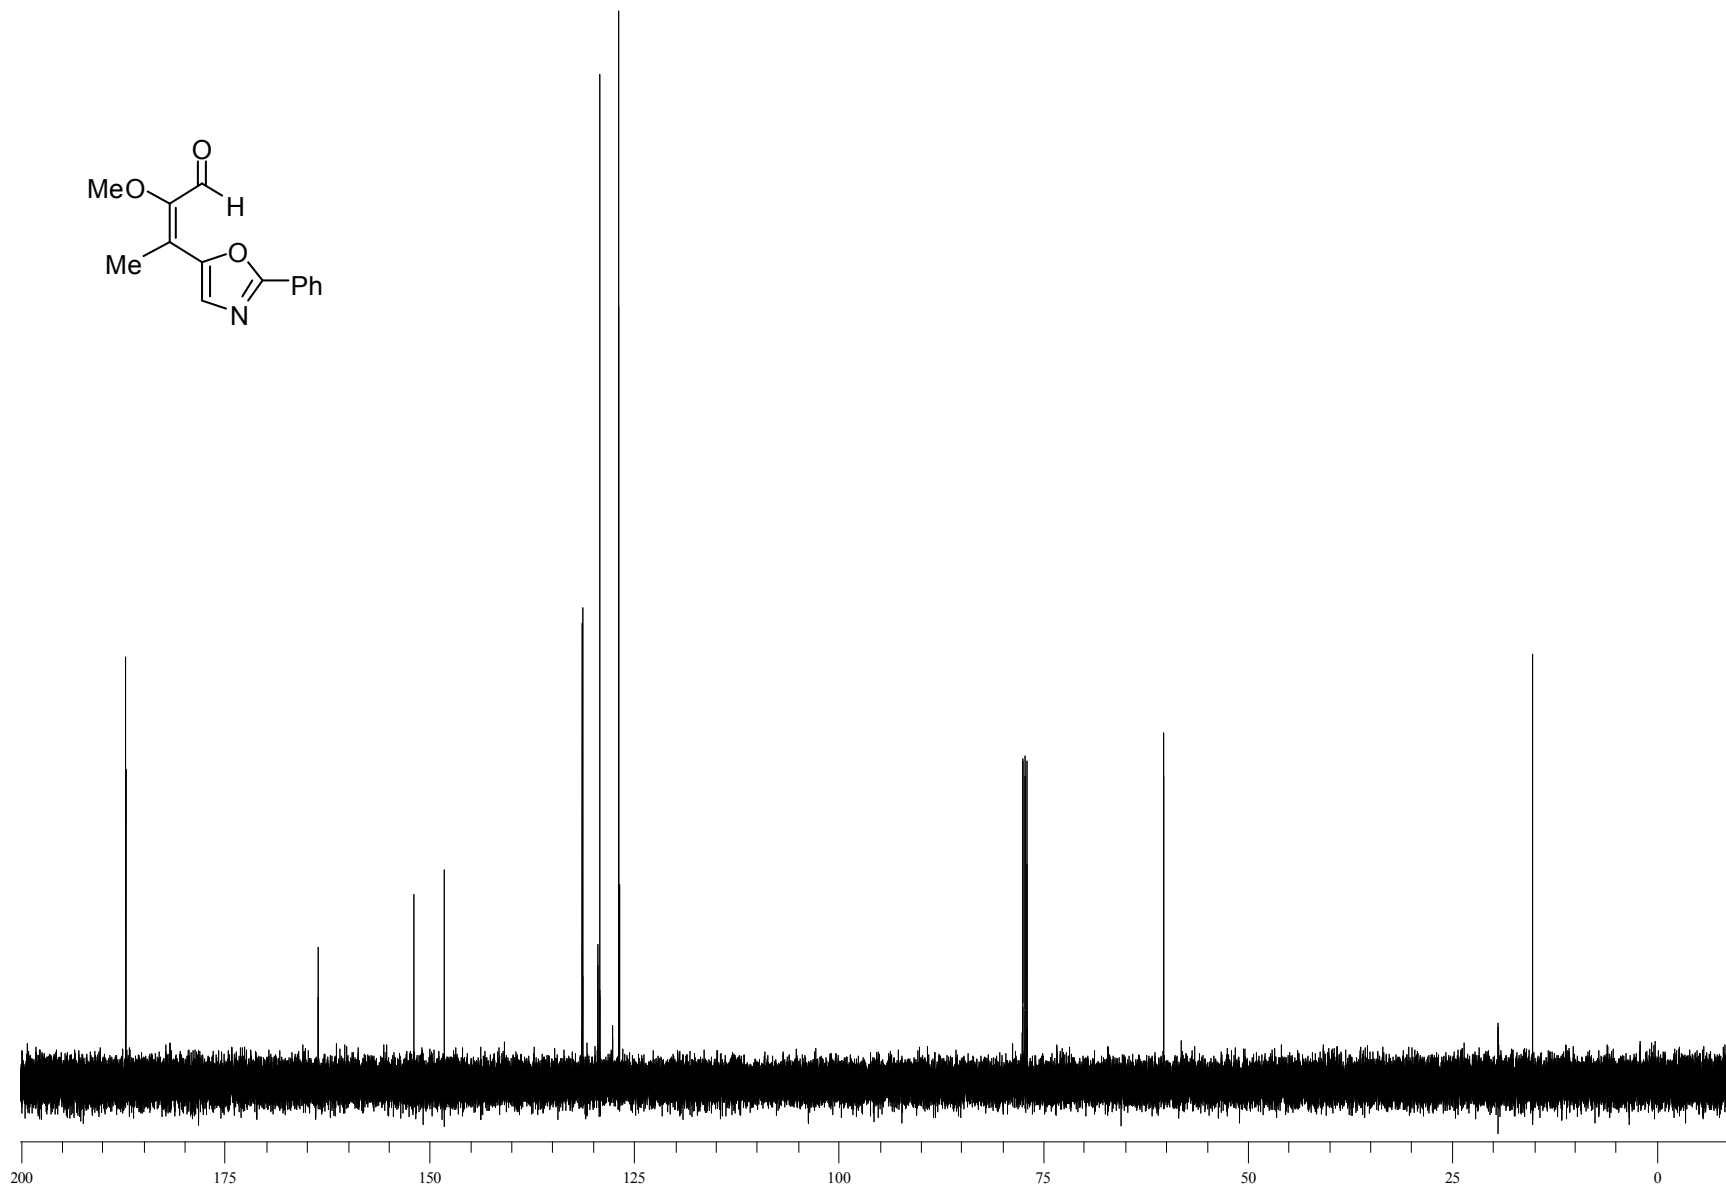

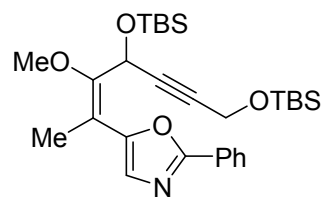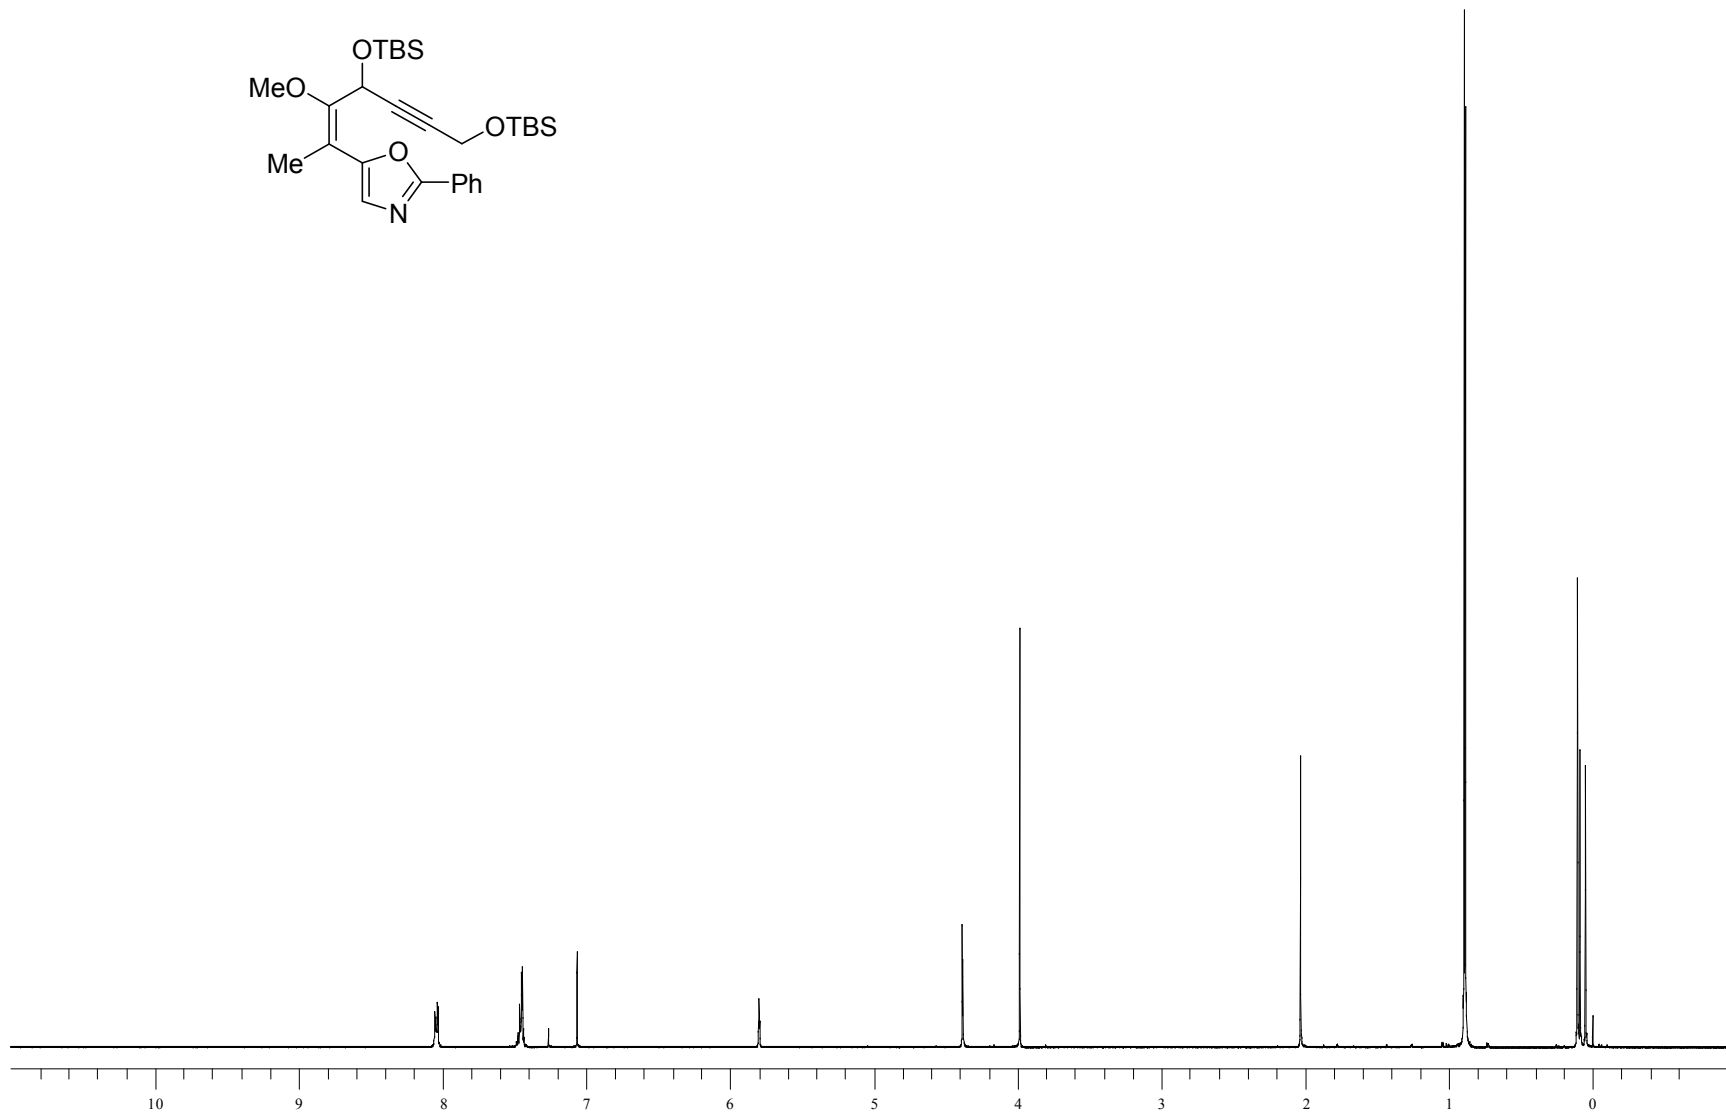

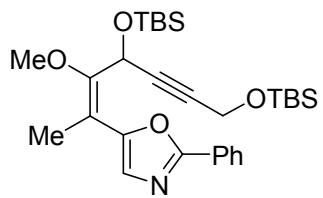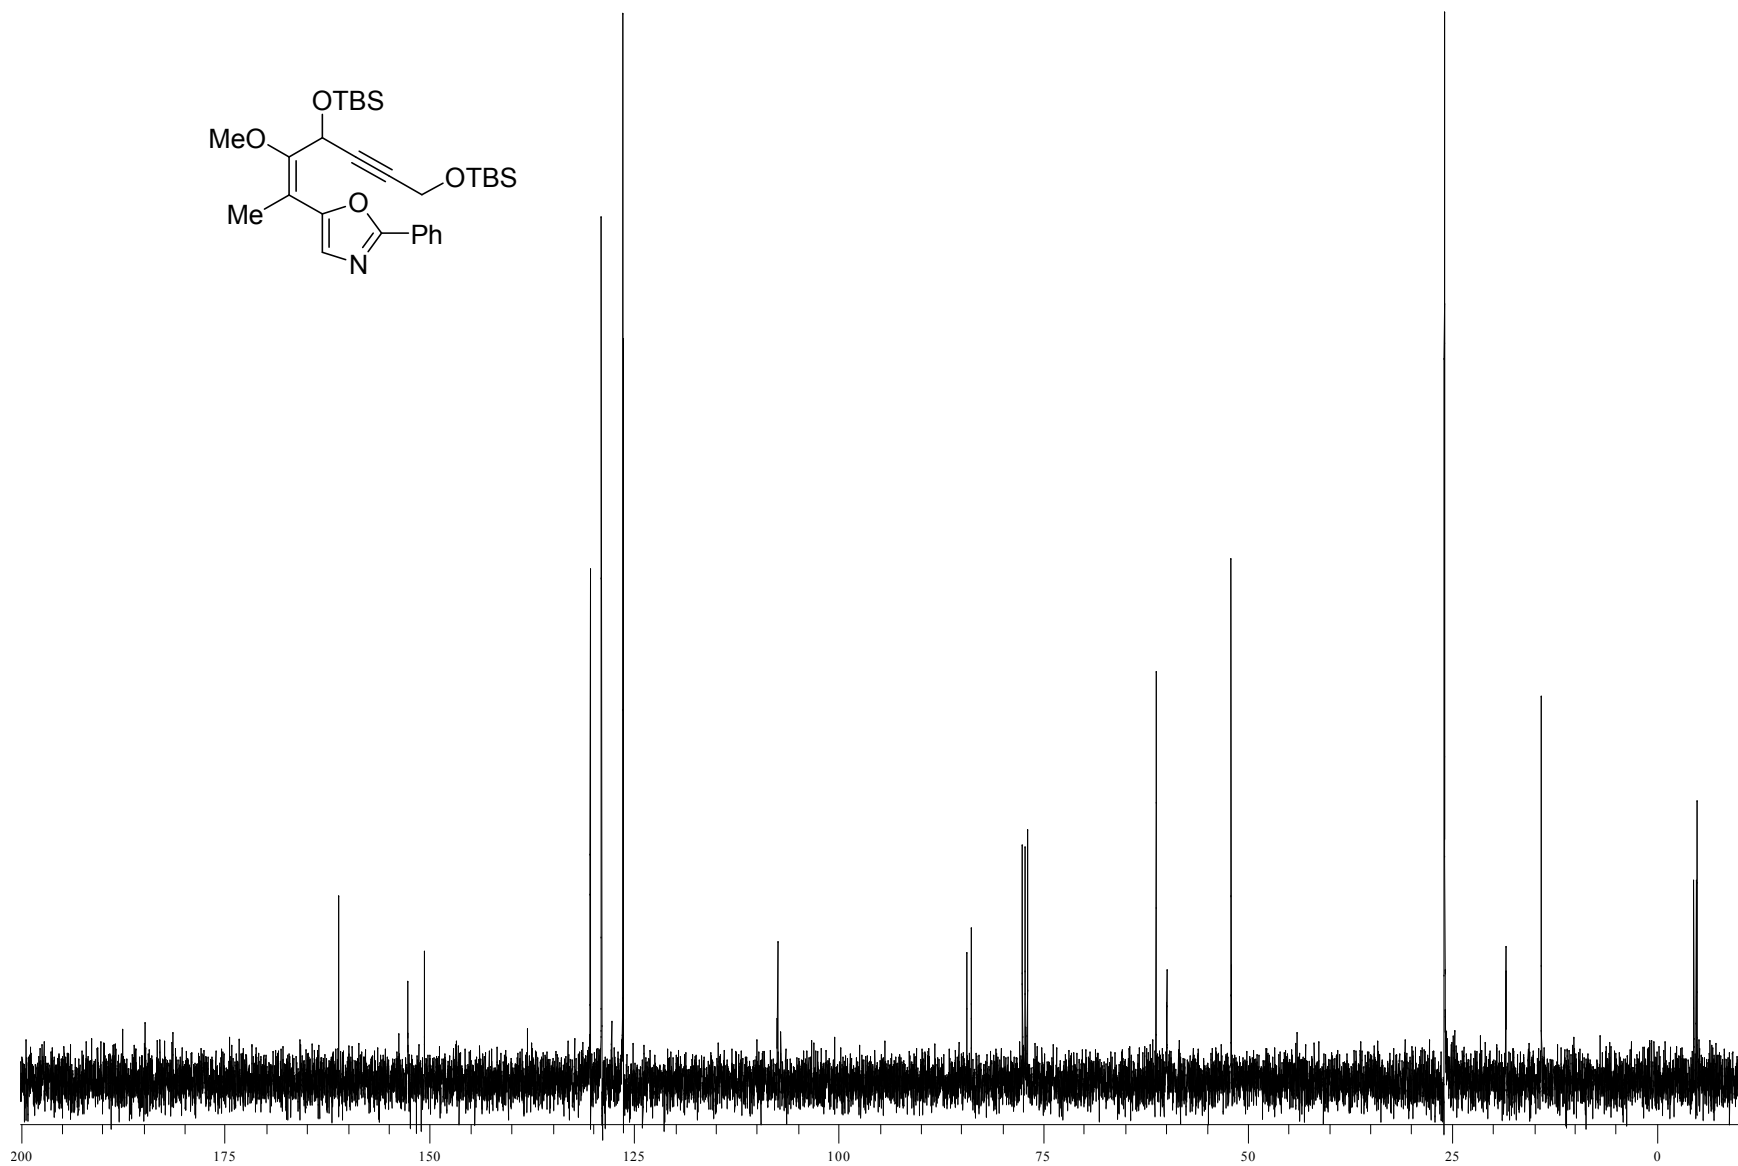

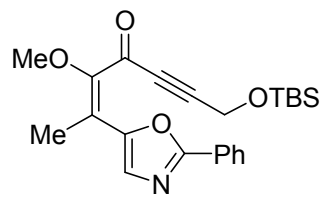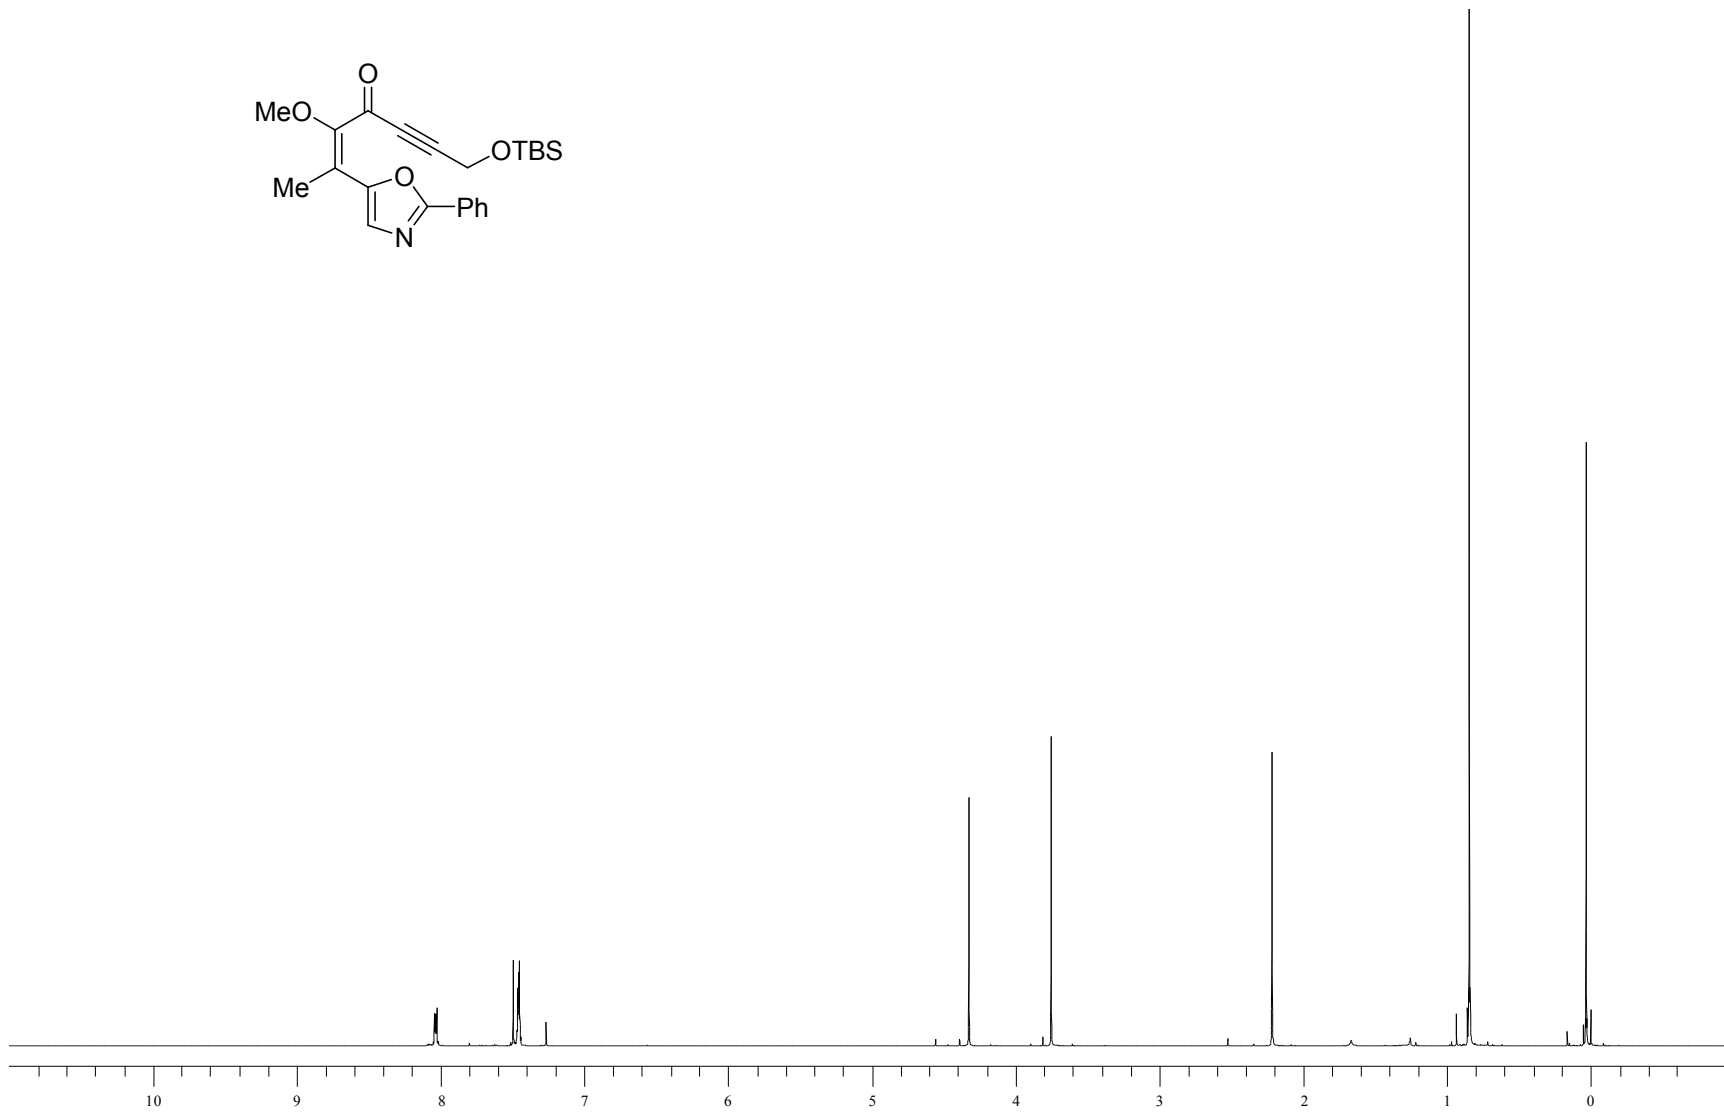

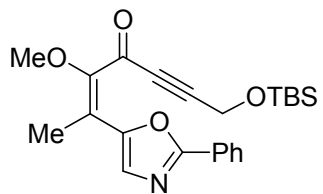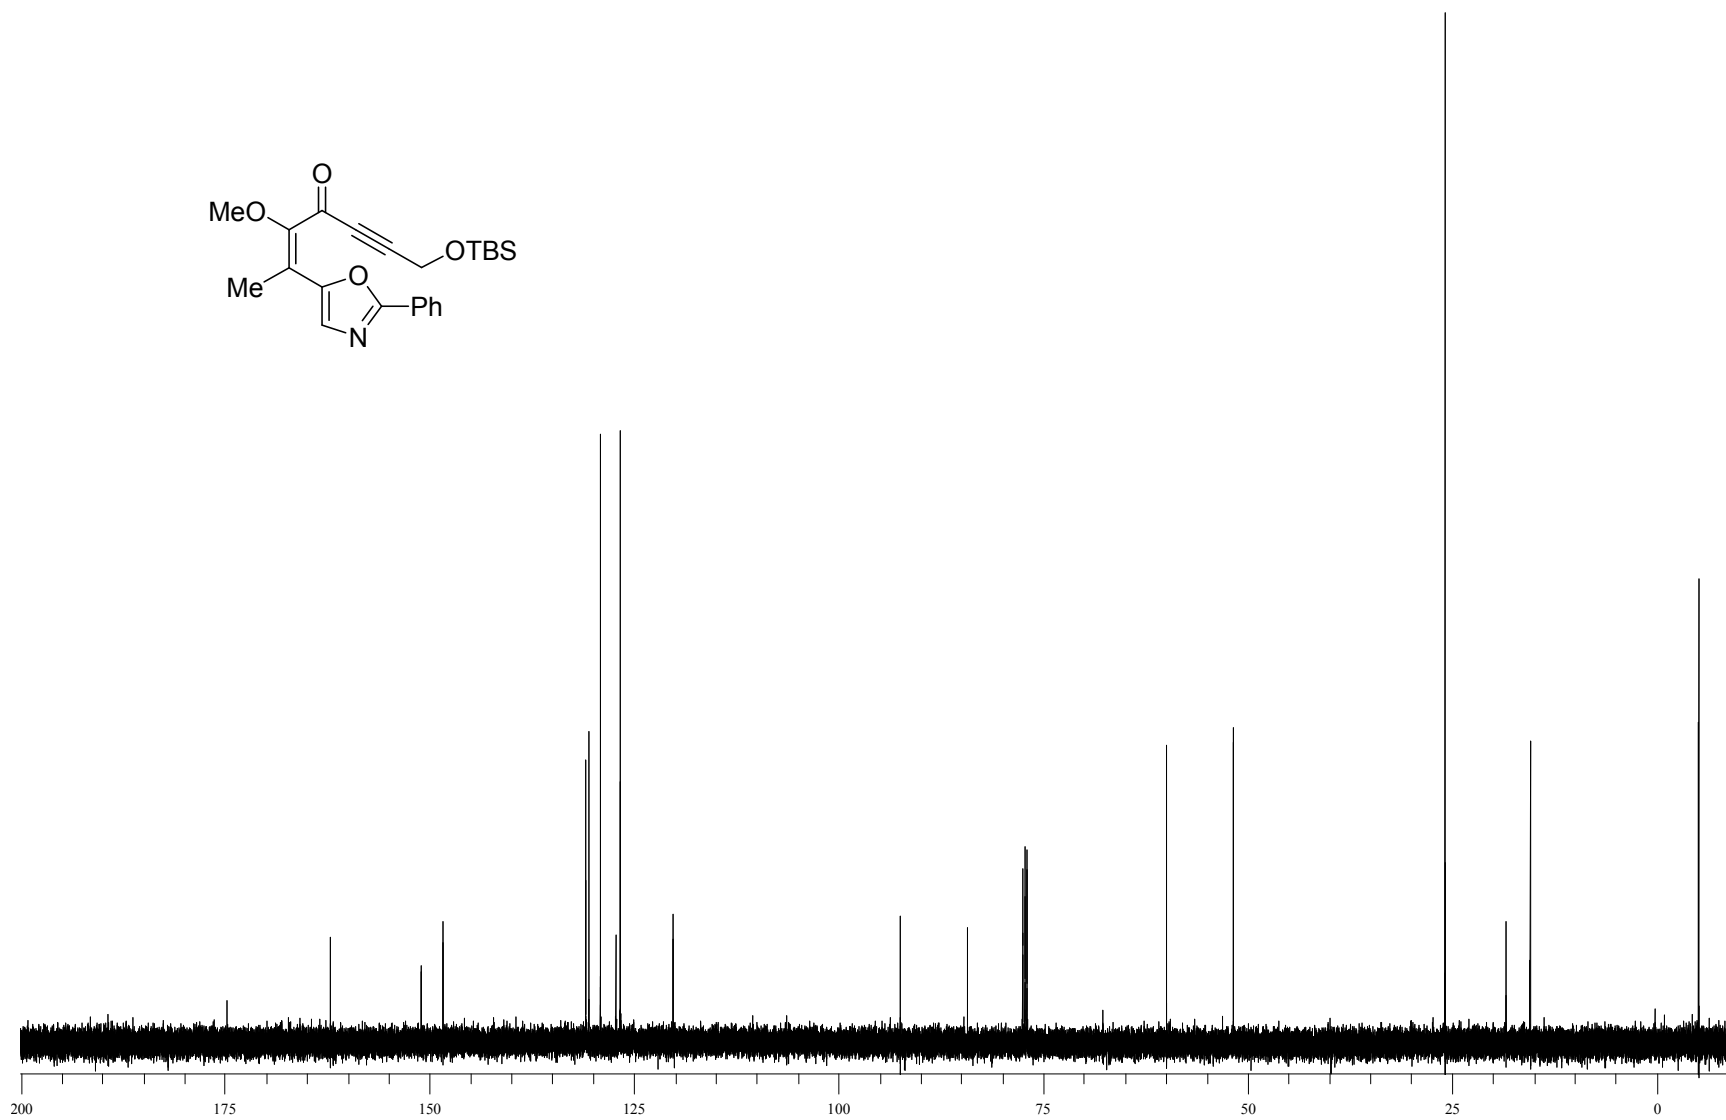

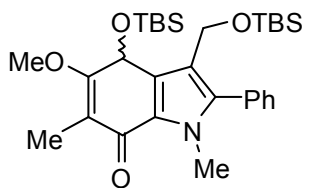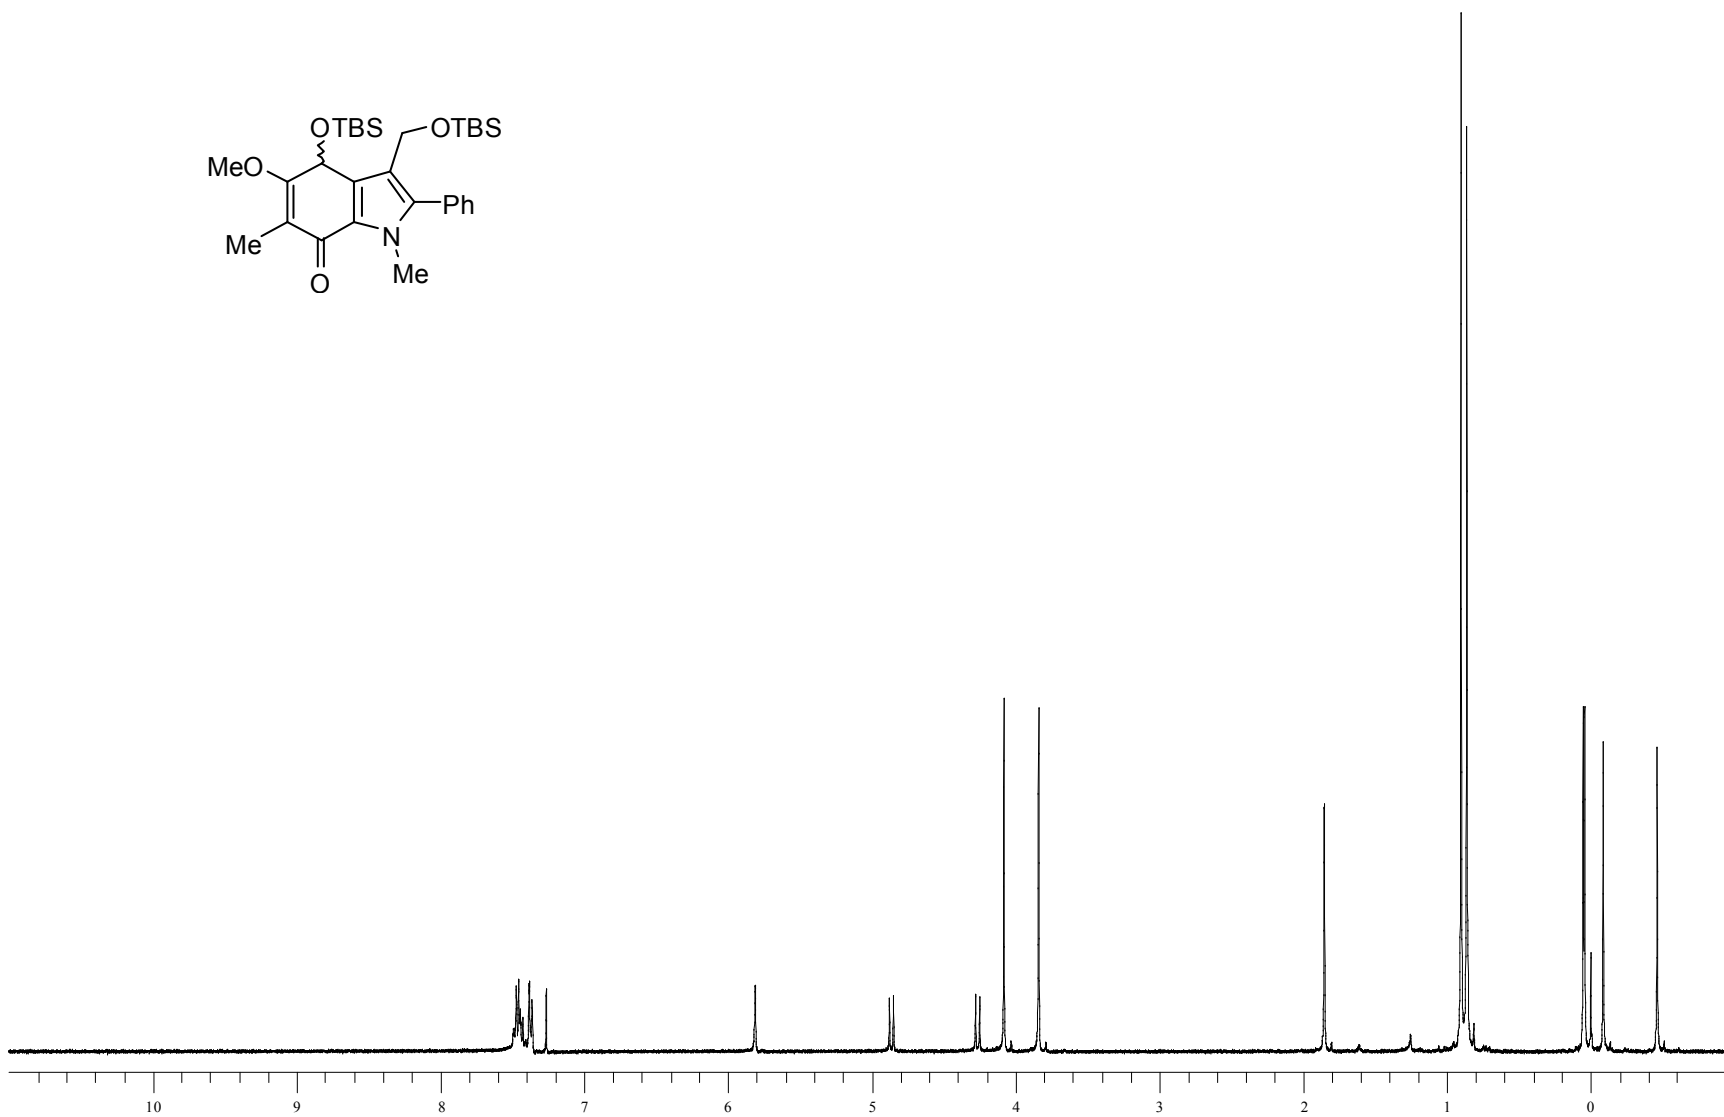

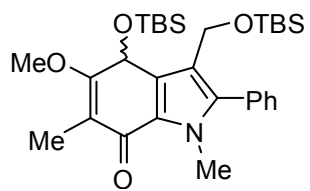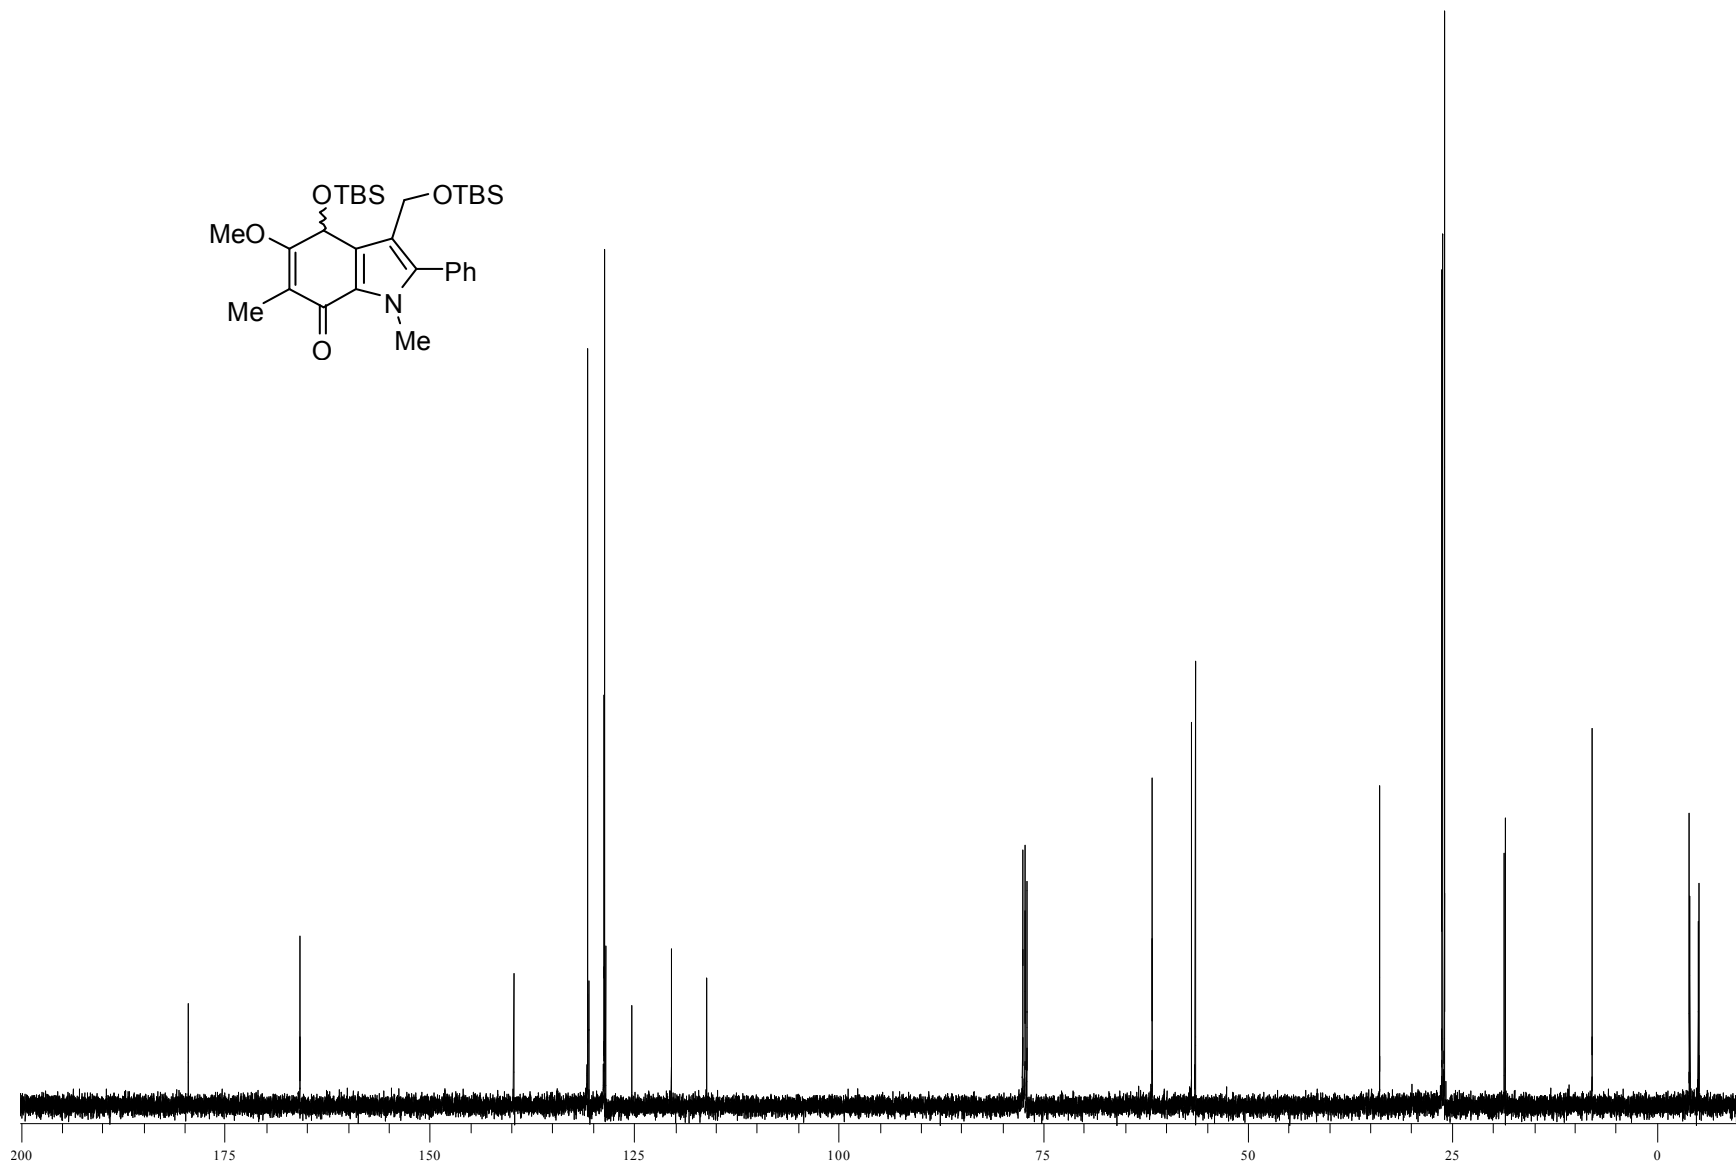



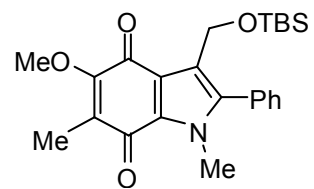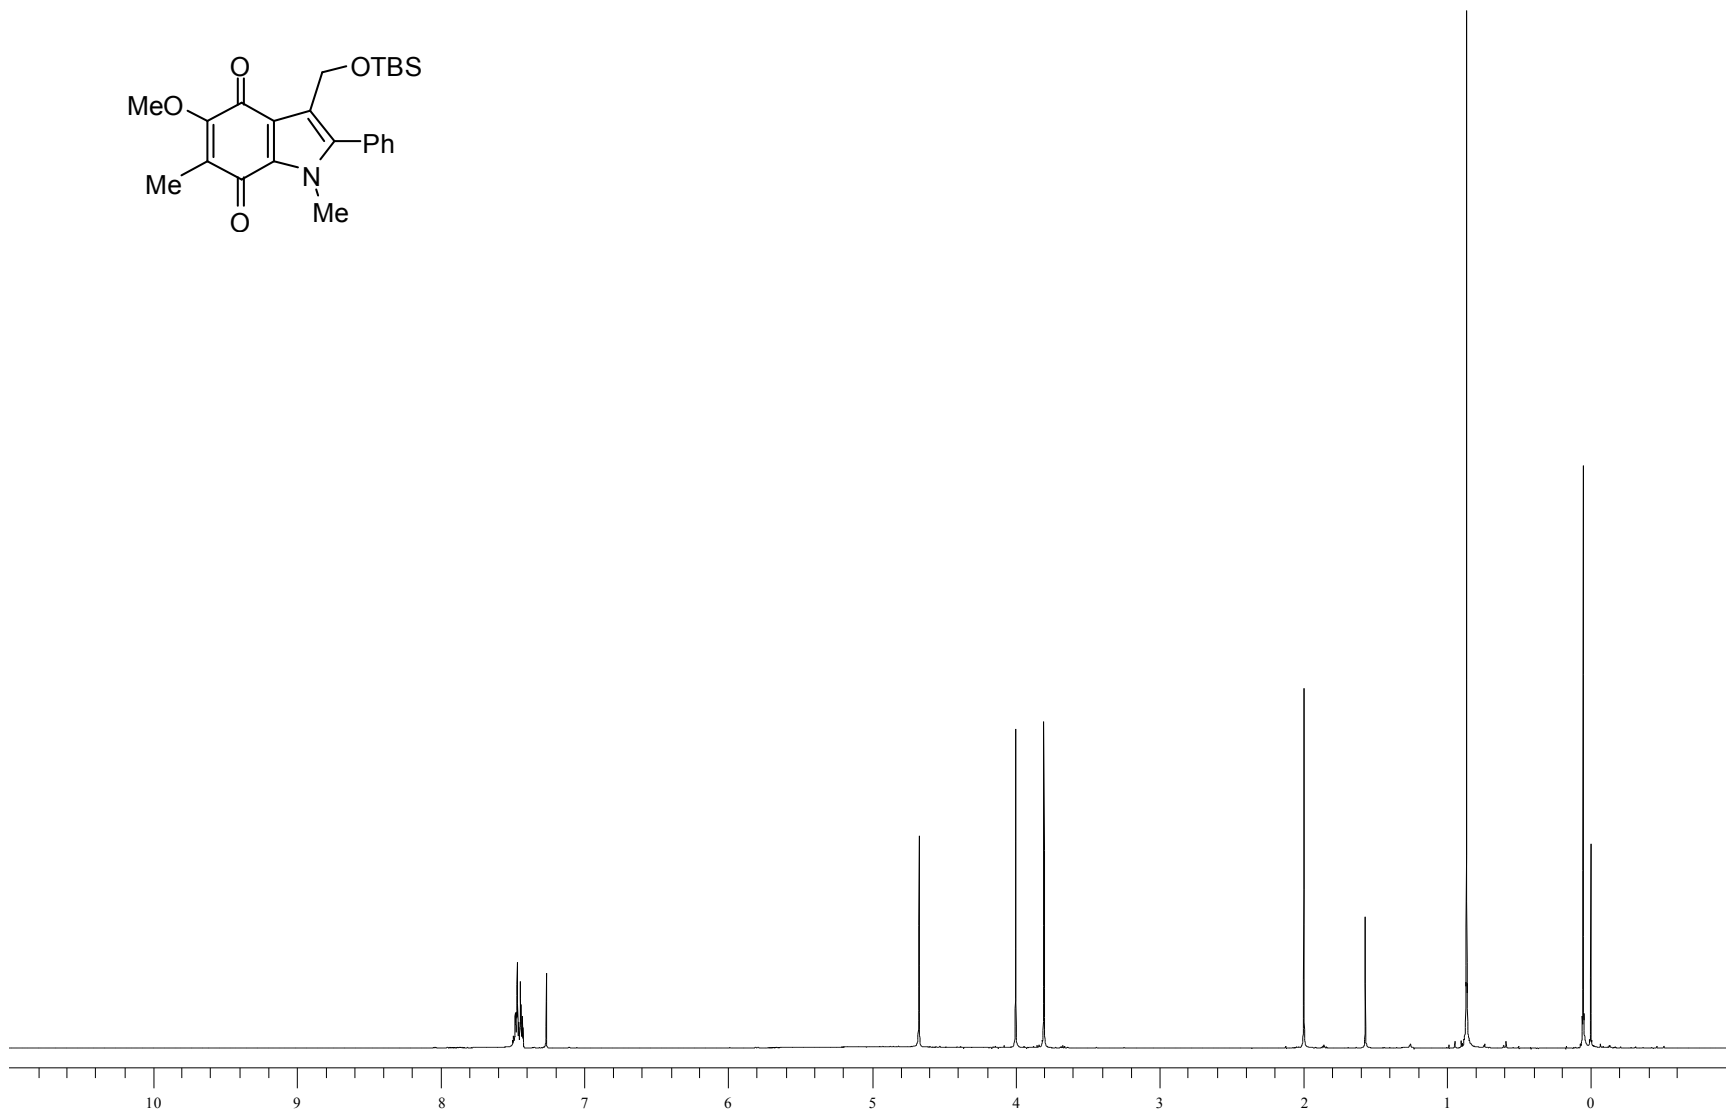

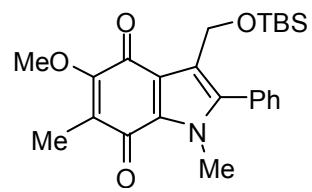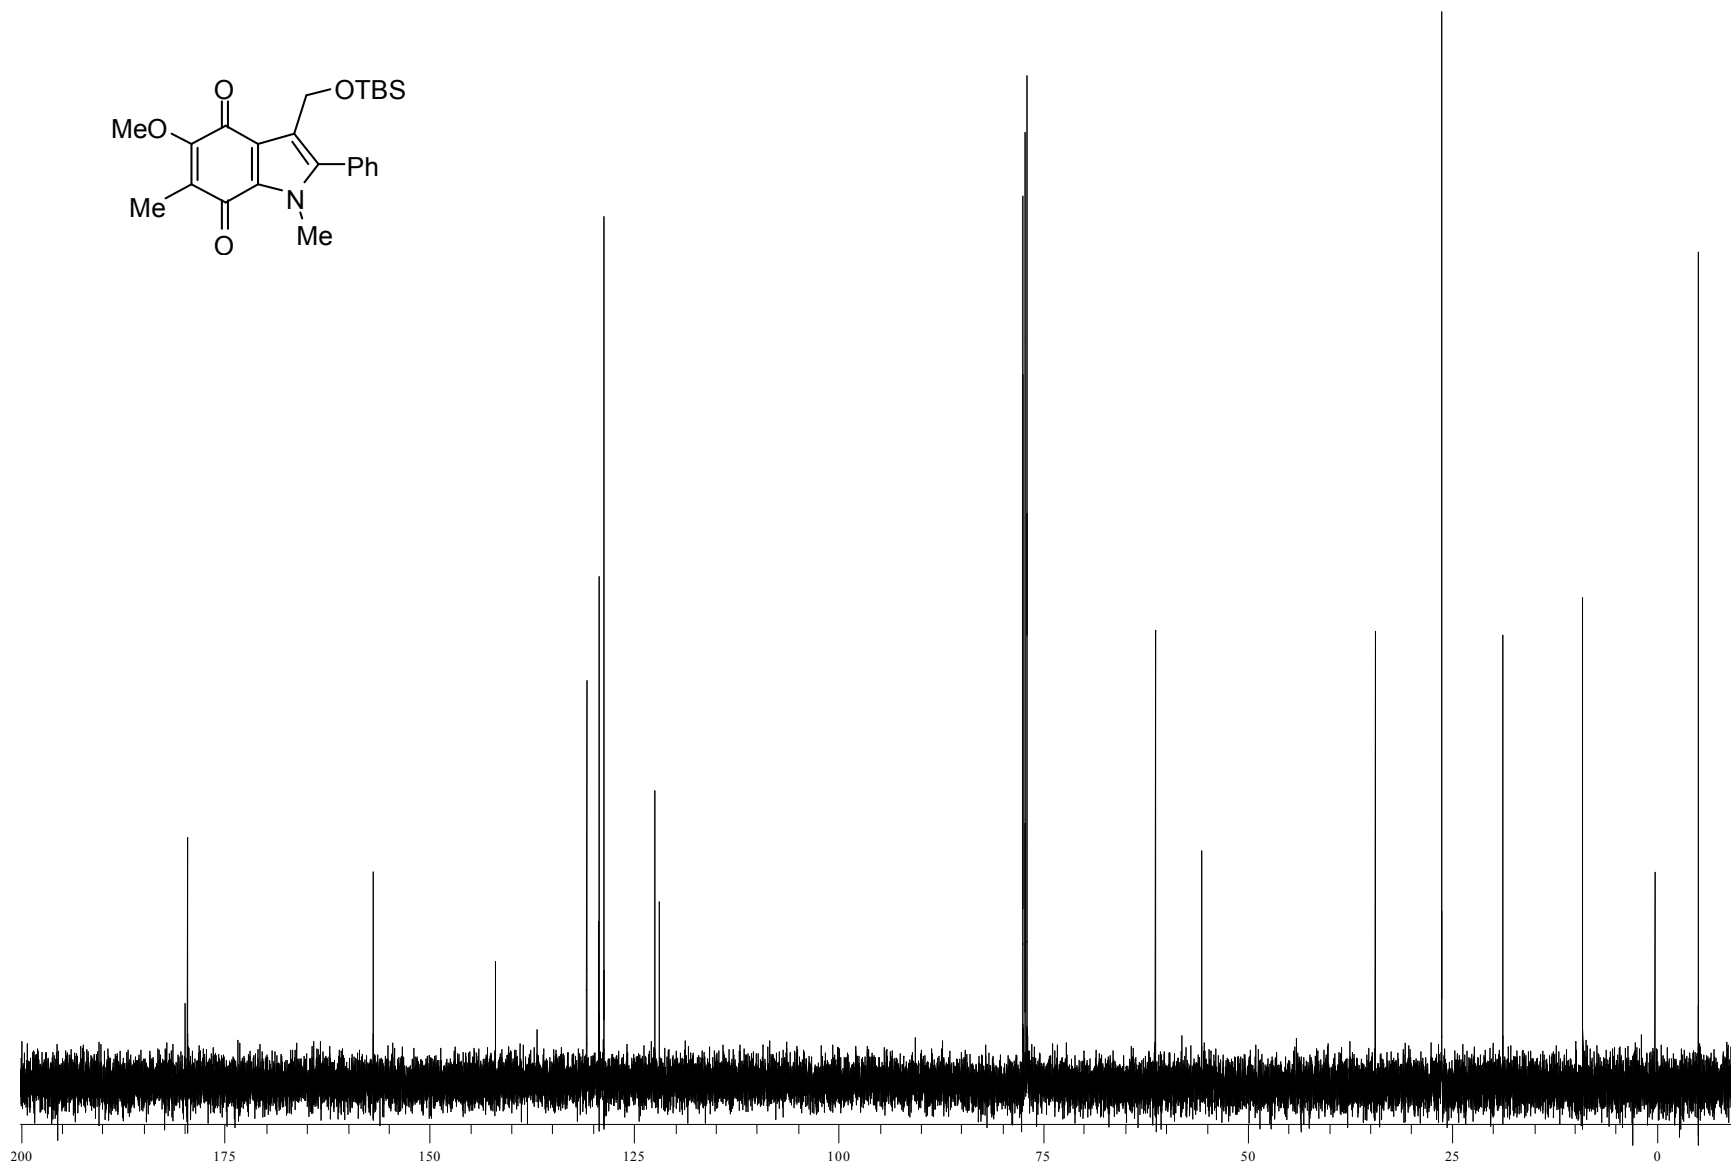

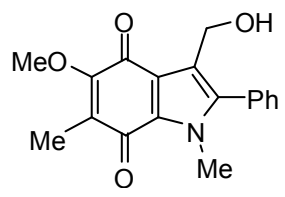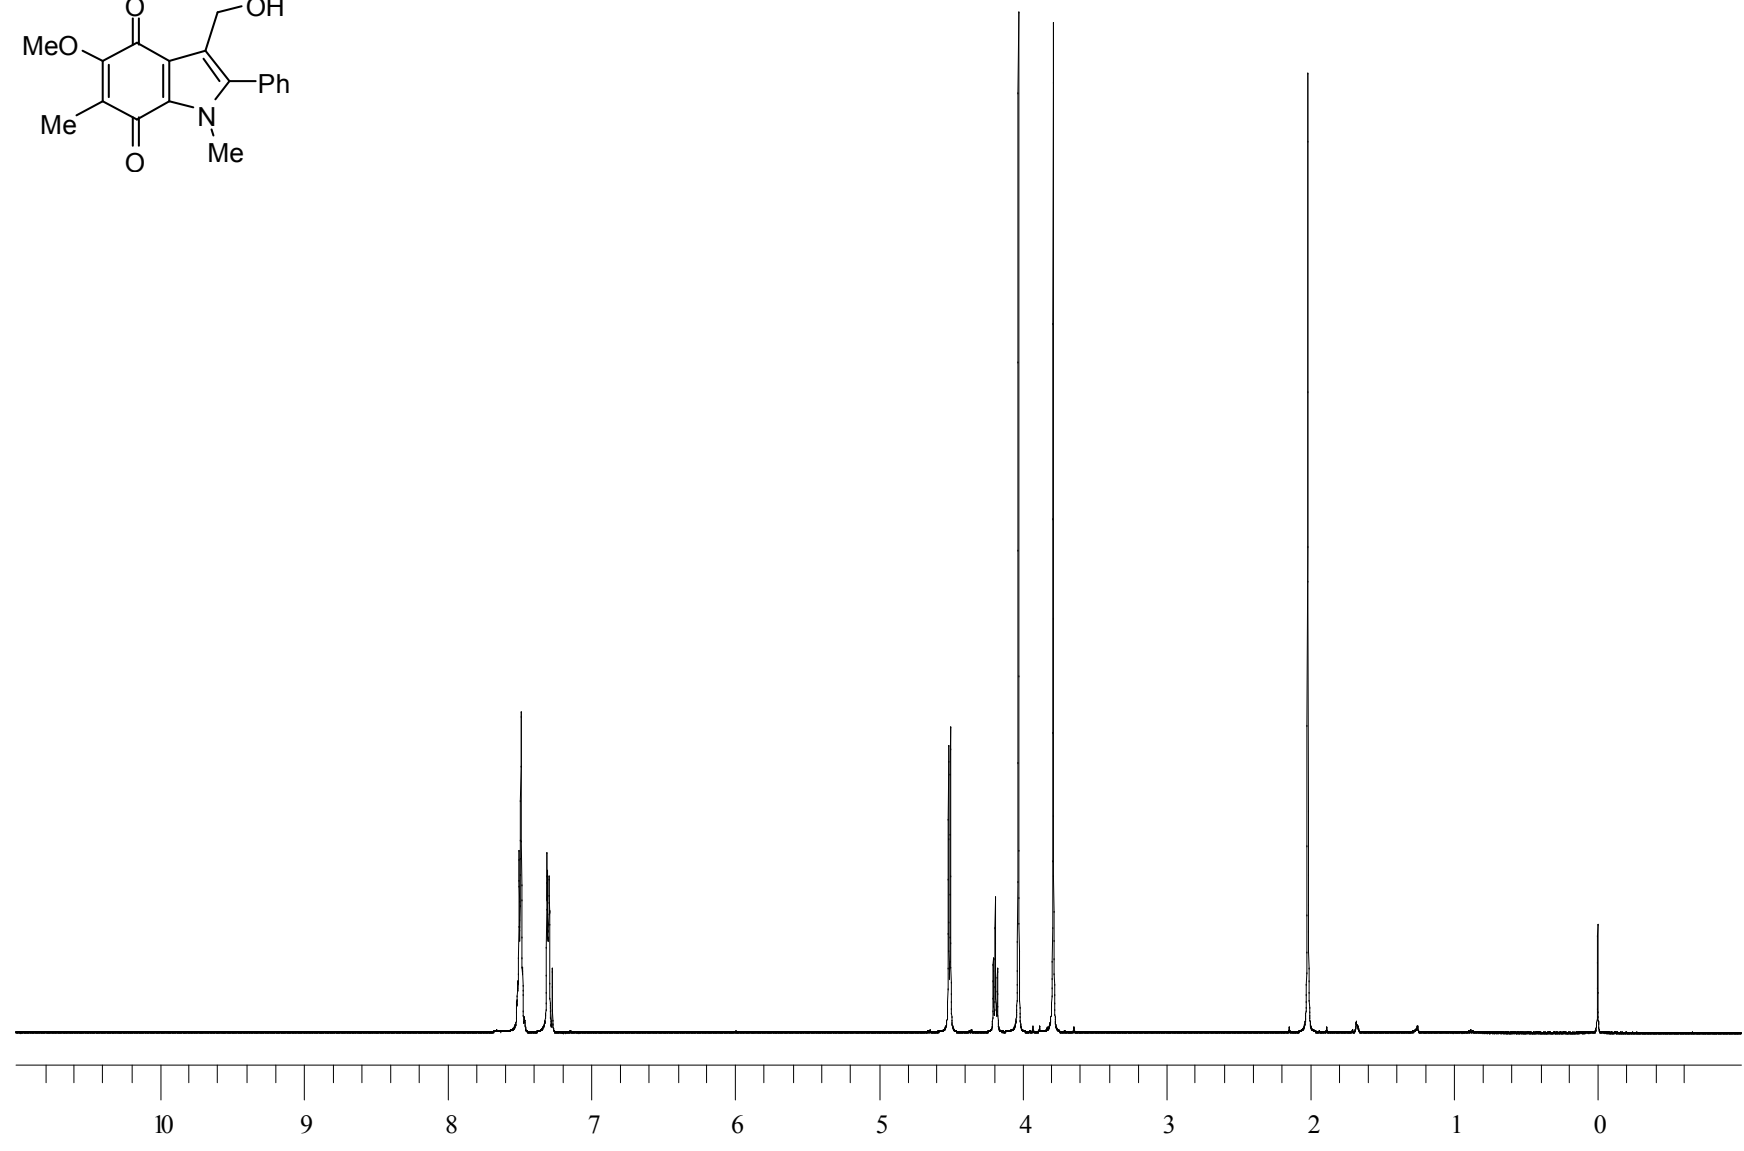

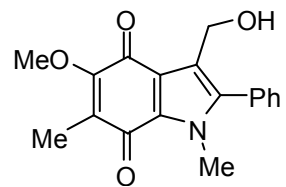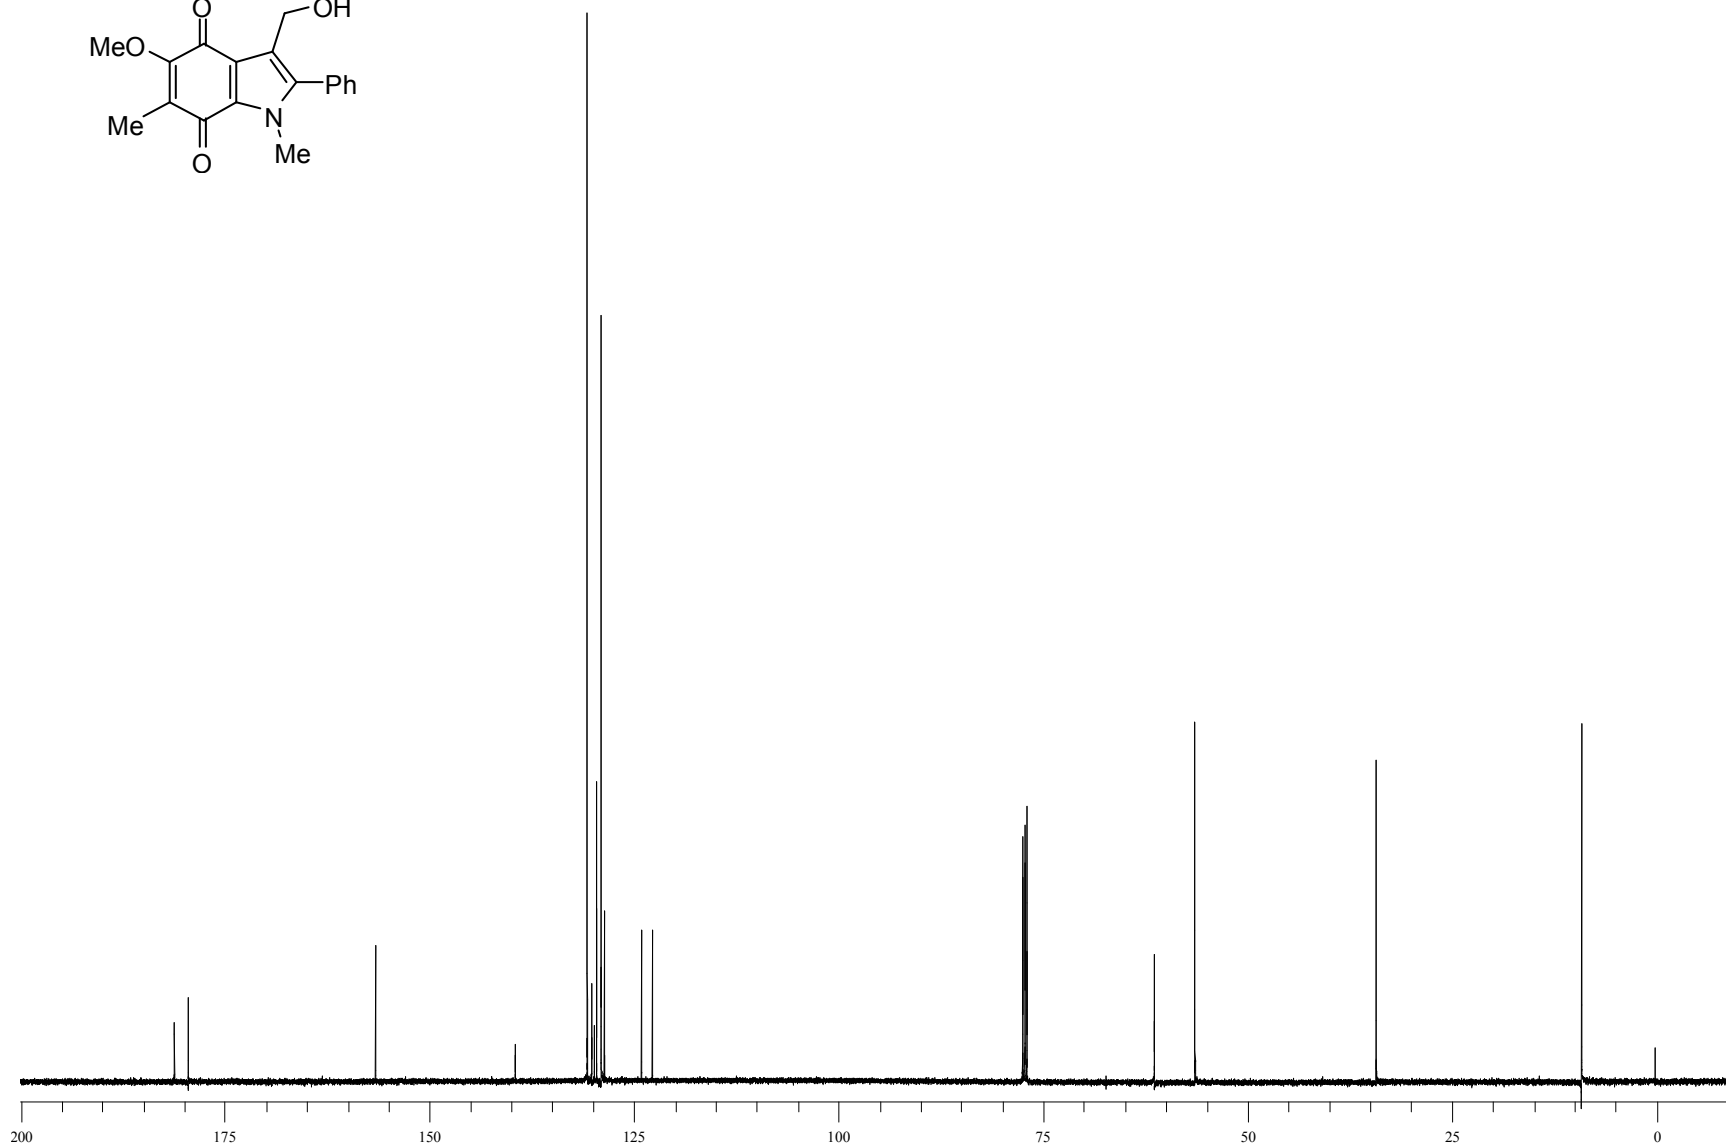

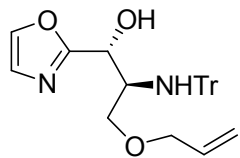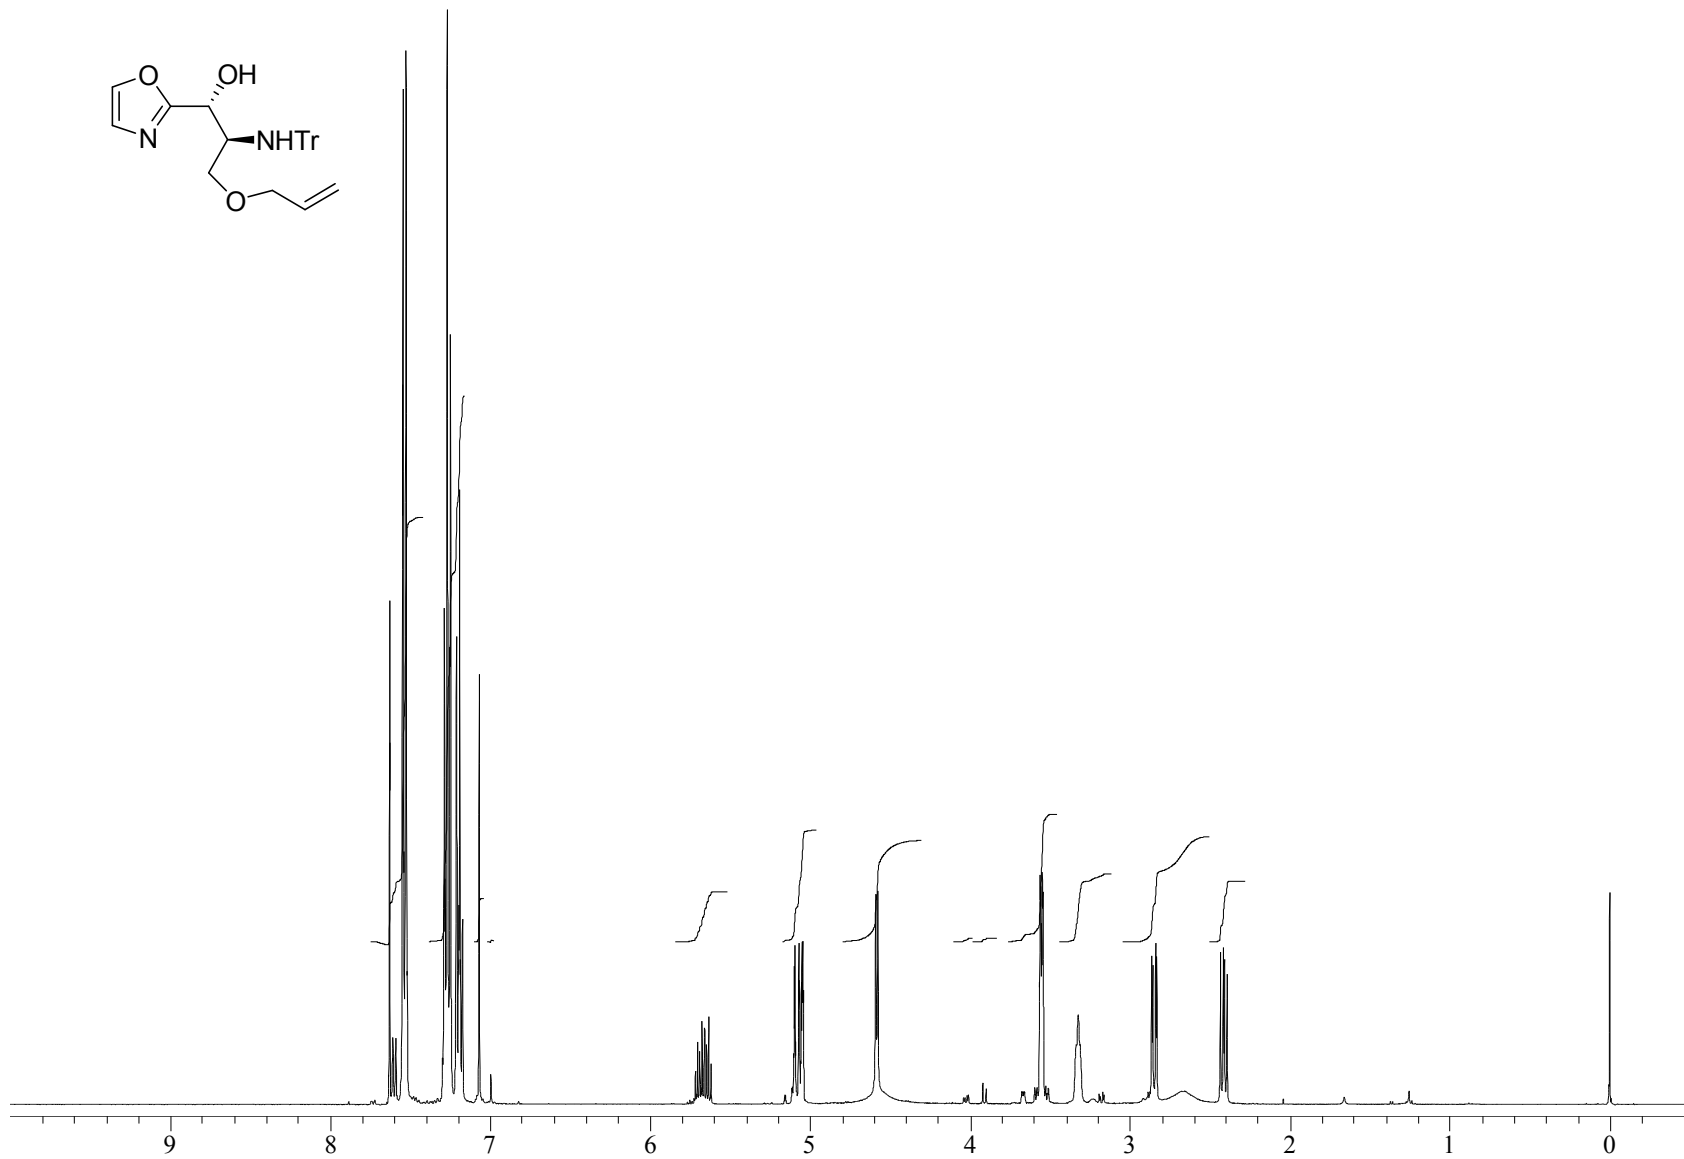

d1w155\_5a\_charac\_c13

Pulse Sequence: s2pul

Solvent: CDCl3

Ambient temperature

INOVA-400 "2r"

PULSE SEQUENCE

Relax. delay 0.900 sec

Pulse 45.0 degrees

Acq. time 1.199 sec

Width 25000.0 Hz

384 Repetitions

OBSERVE C13, 100.5712693 MHz

DECOUPLE H1, 399.9669644 MHz

Power 44 dB

continuously on

WALTZ-16 modulated

DATA PROCESSING

Line broadening 1.0 Hz

FT size 65536

Total time 35 min, 58 sec

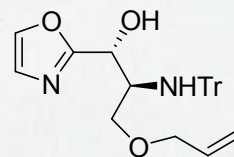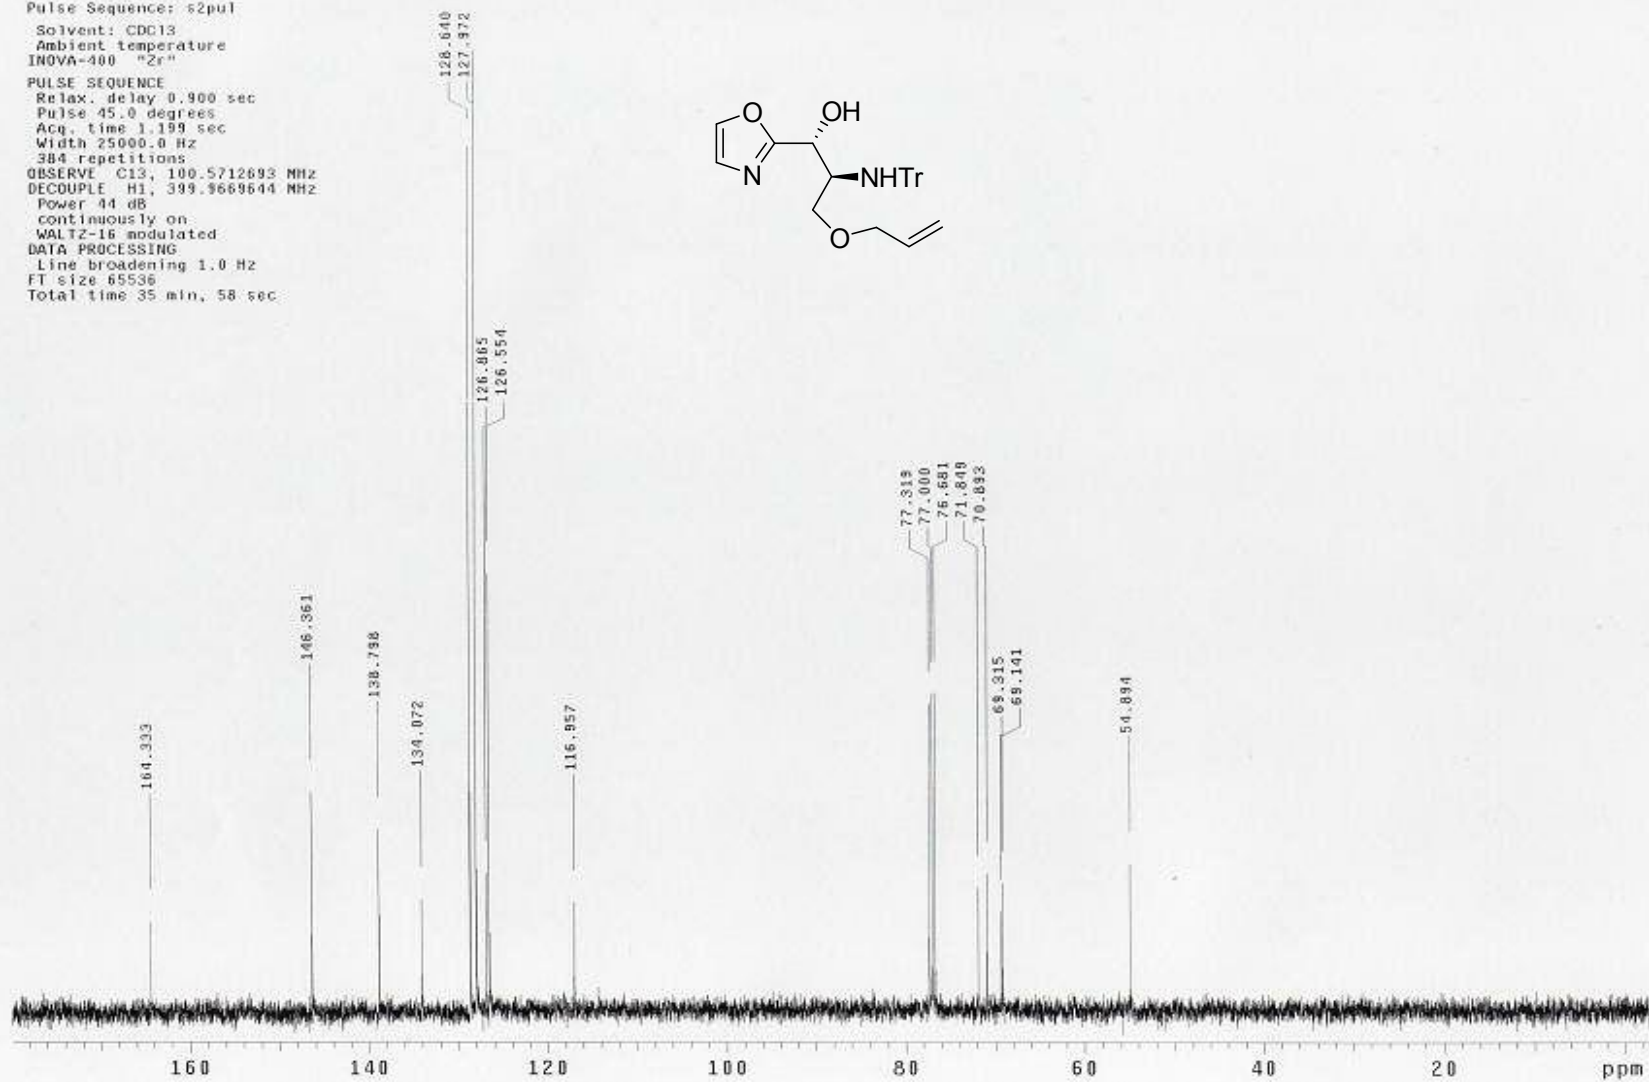

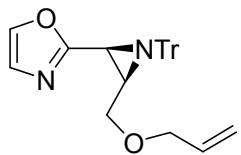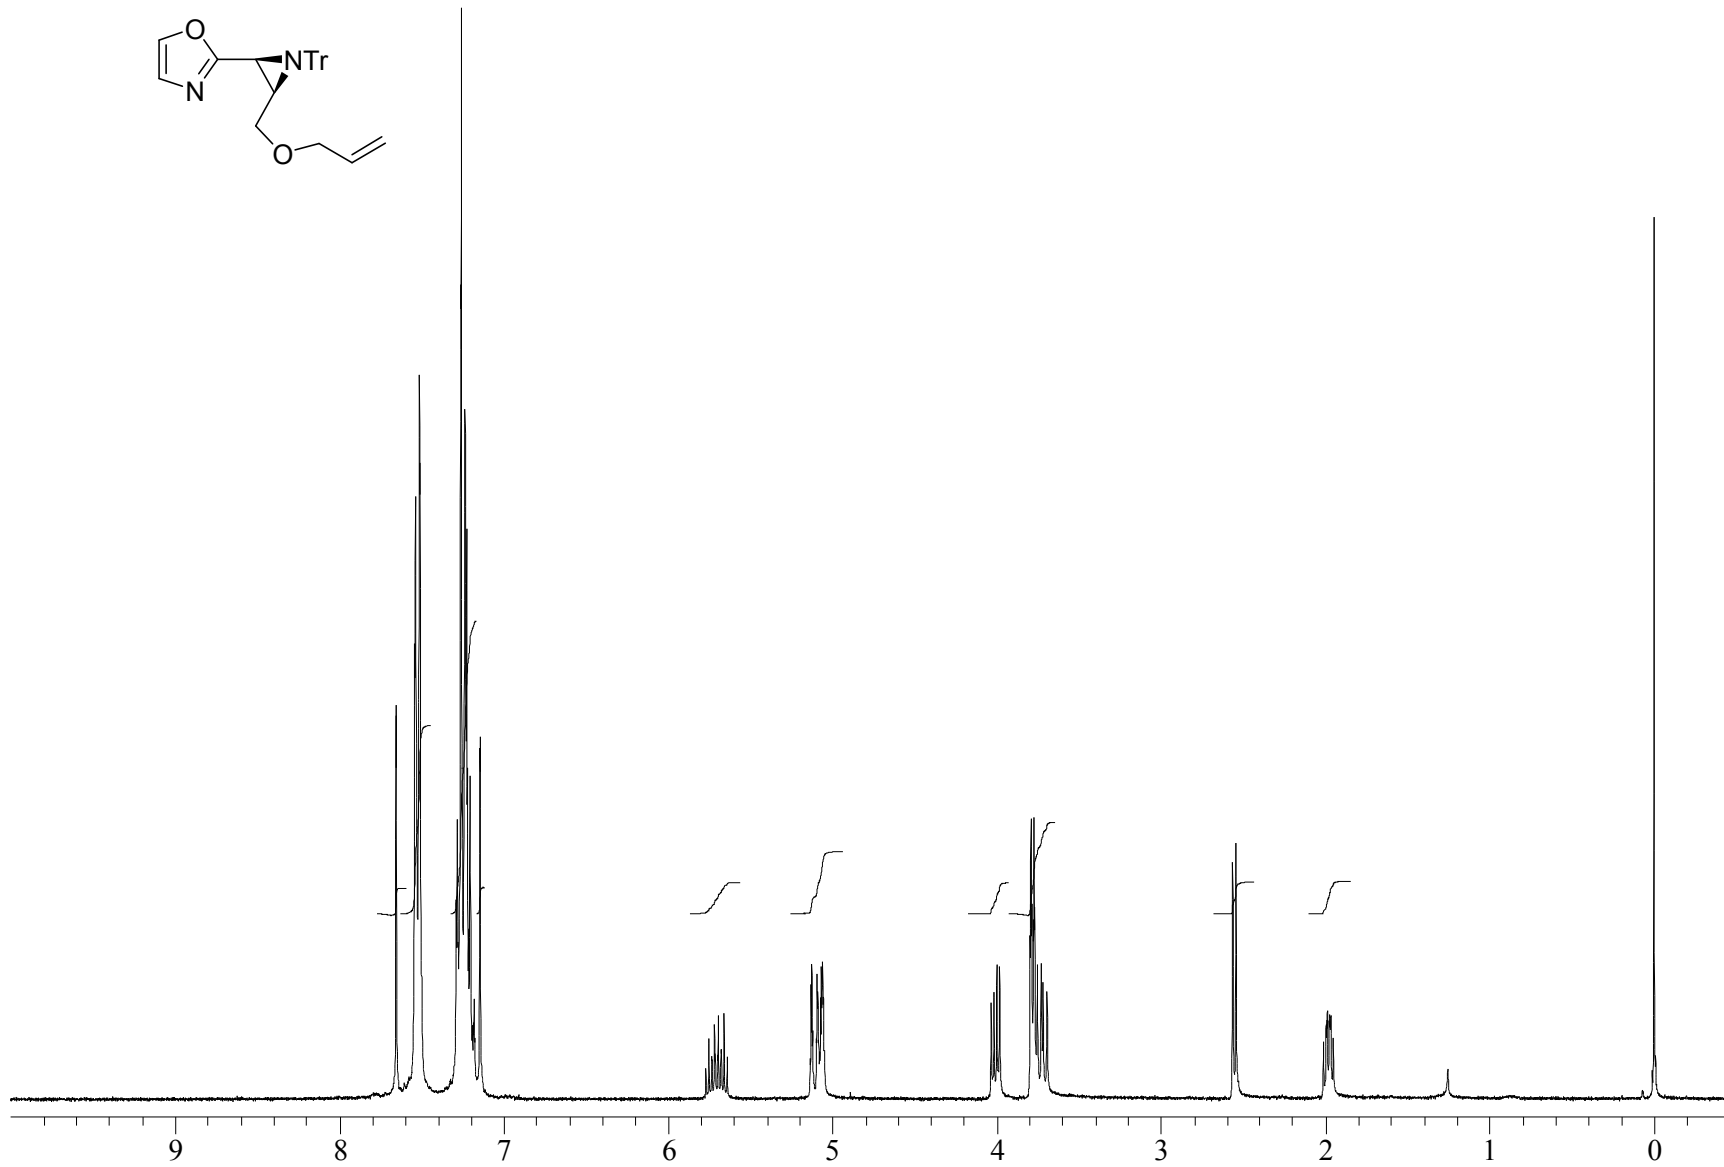

13C OBSERVE

Pulse Sequence: s2pu1  
Solvent: CDCl3  
Ambient temperature  
INNOVA-400 "Zr"

PULSE SEQUENCE  
Pulse 40.0 degrees  
Acq. time 1.139 sec  
Width 25000.0 Hz  
1800 repetitions  
OBSERVE C13, 100.5712677 MHz  
DECUPLE H1, 399.9663644 MHz  
Power 44 dB  
Continuously on  
WALTZ-16 modulated  
DATA PROCESSING  
Line broadening 1.0 Hz  
FT size 65536  
Total time 41 min, 14 sec

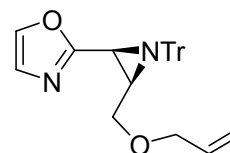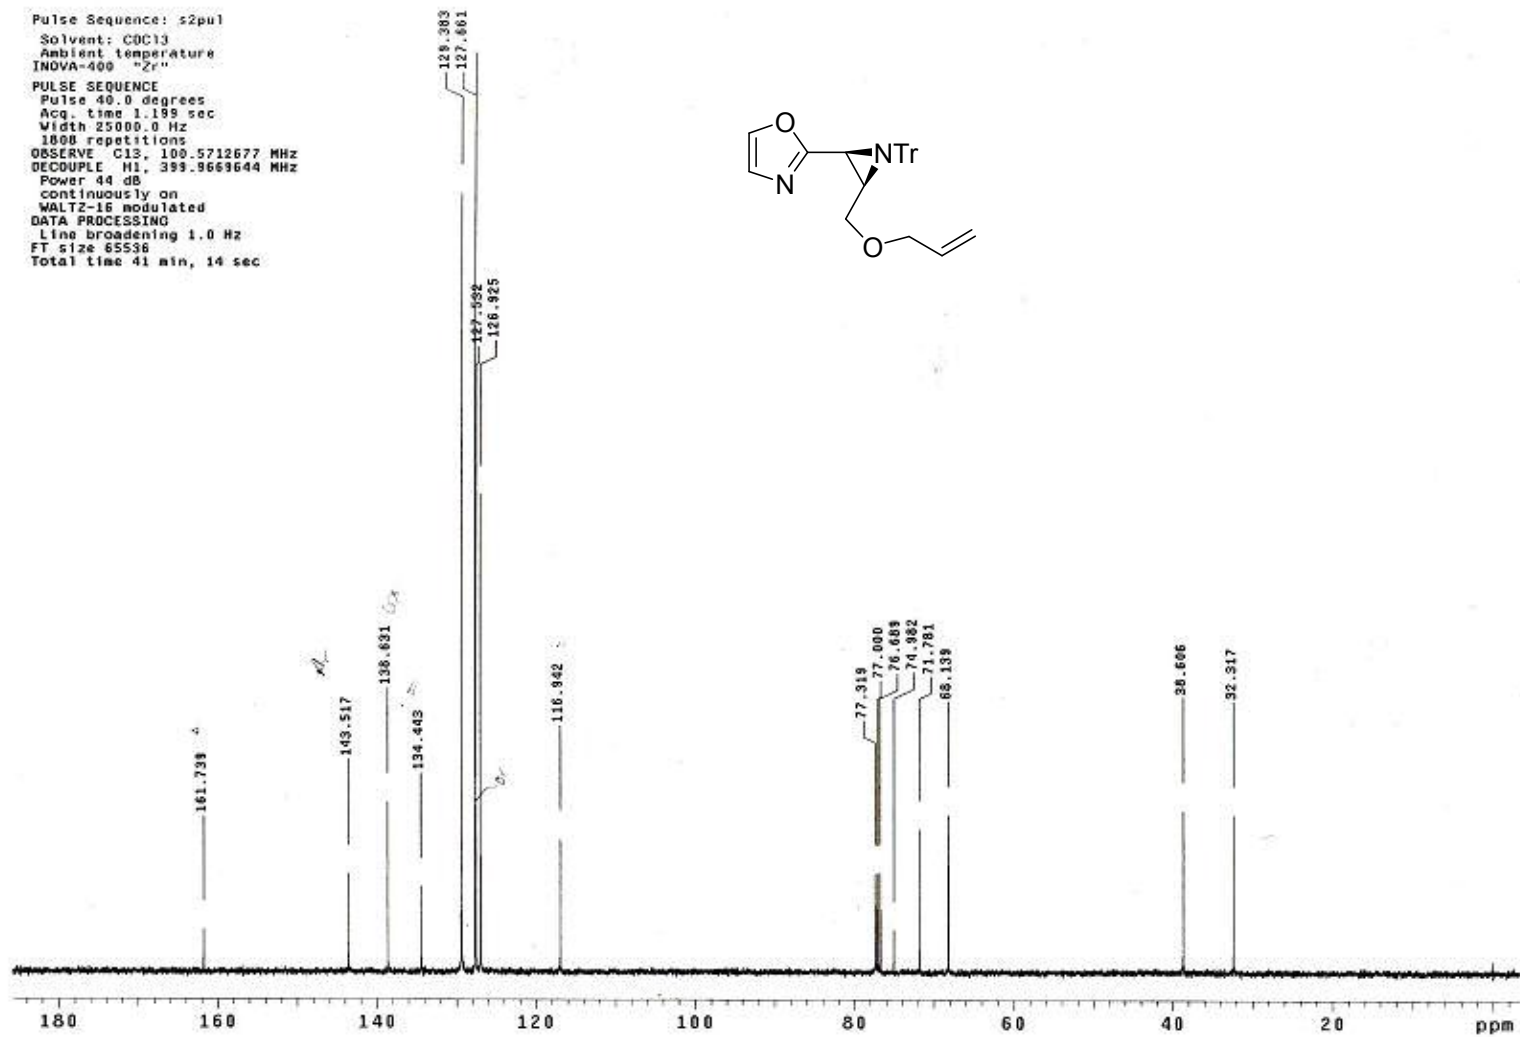



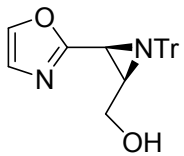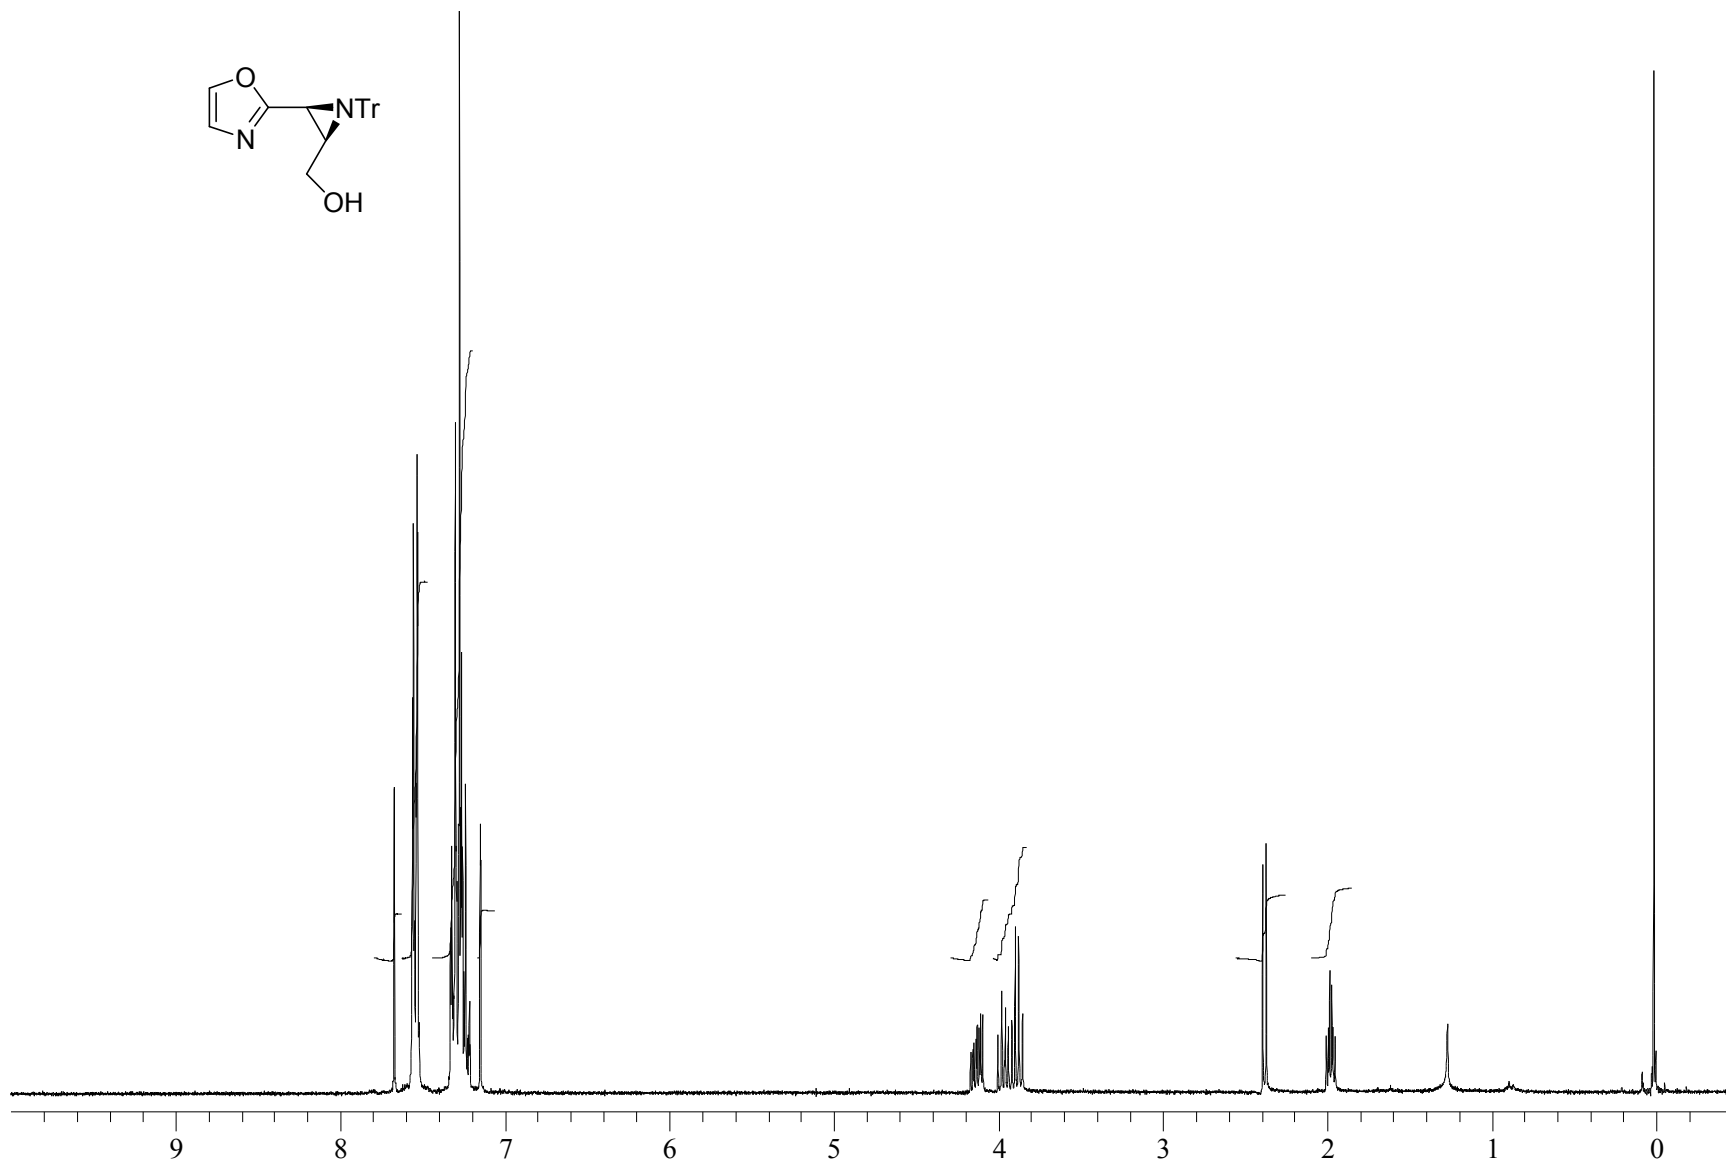

d1w244\_5a\_c13\_charac  
Pulse Sequence: s2pul  
Solvent: CDC13  
Ambient temperature  
INOVA-400 "2r"  
PULSE SEQUENCE  
Relax. delay 0.900 sec  
Pulse 45.0 degrees  
Acq. time 1.189 sec  
Width 25000.0 Hz  
14550 repetitions  
OBSERVE C13, 100.5712654 MHz  
DECOUPLE H1, 399.9669644 MHz  
Power 44 dB  
continuously on  
WALTZ-16 modulated  
DATA PROCESSING  
Line broadening 1.0 Hz  
FT size 65536  
Total time 585 hr, 36 min, 49 sec

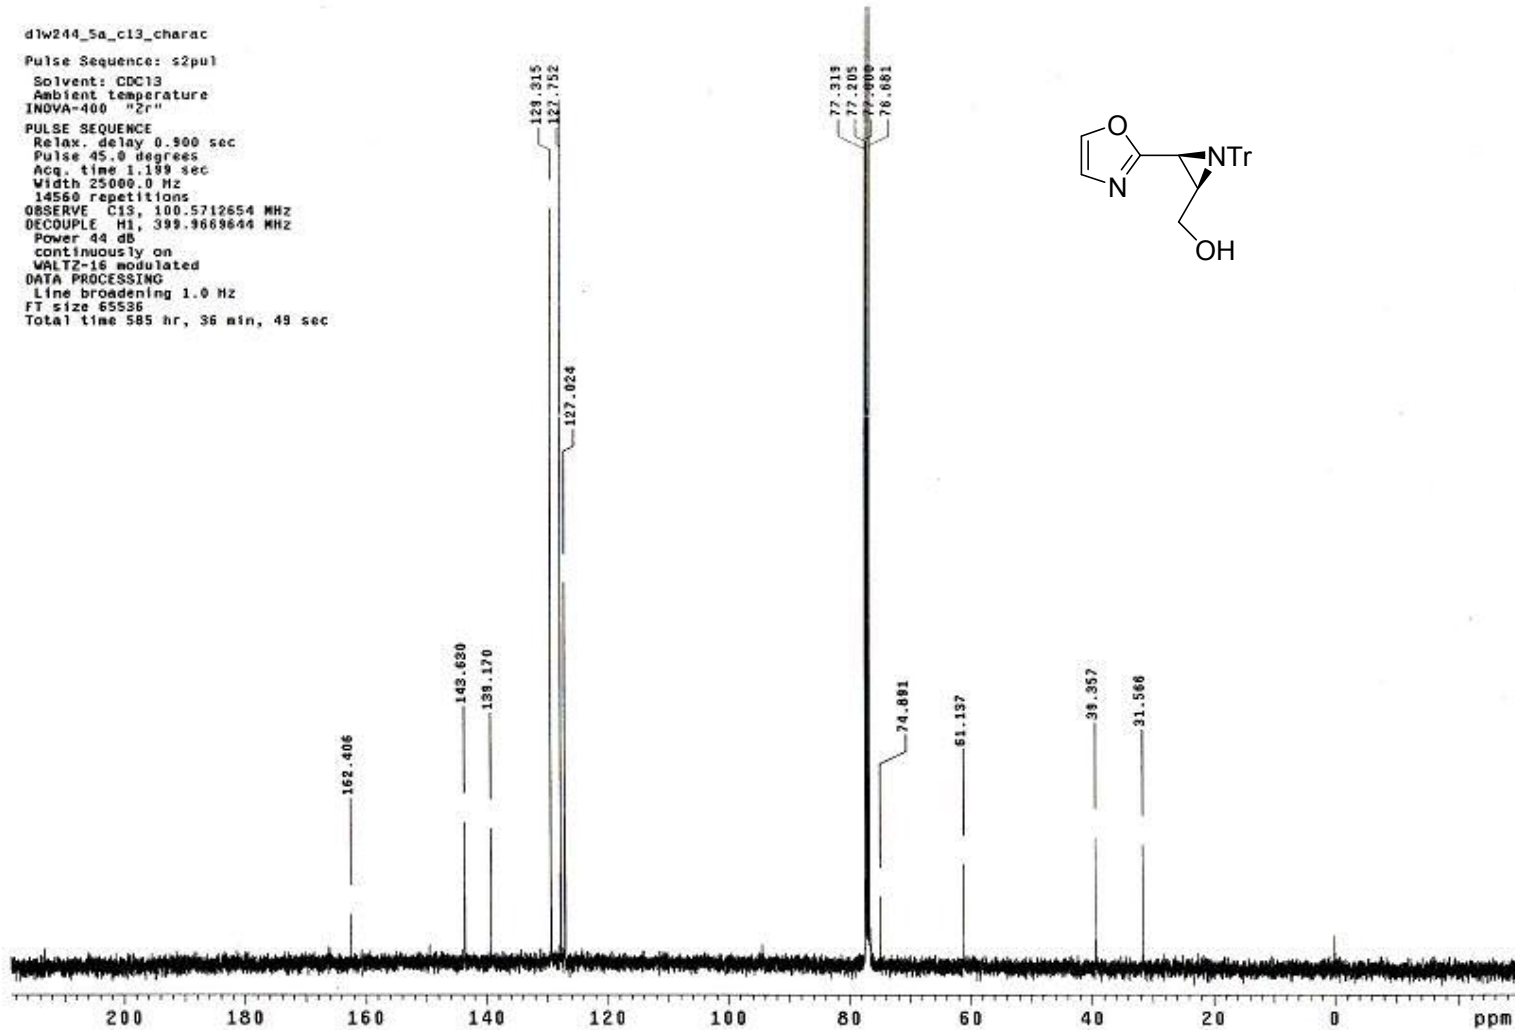

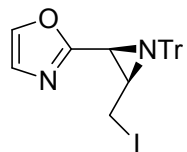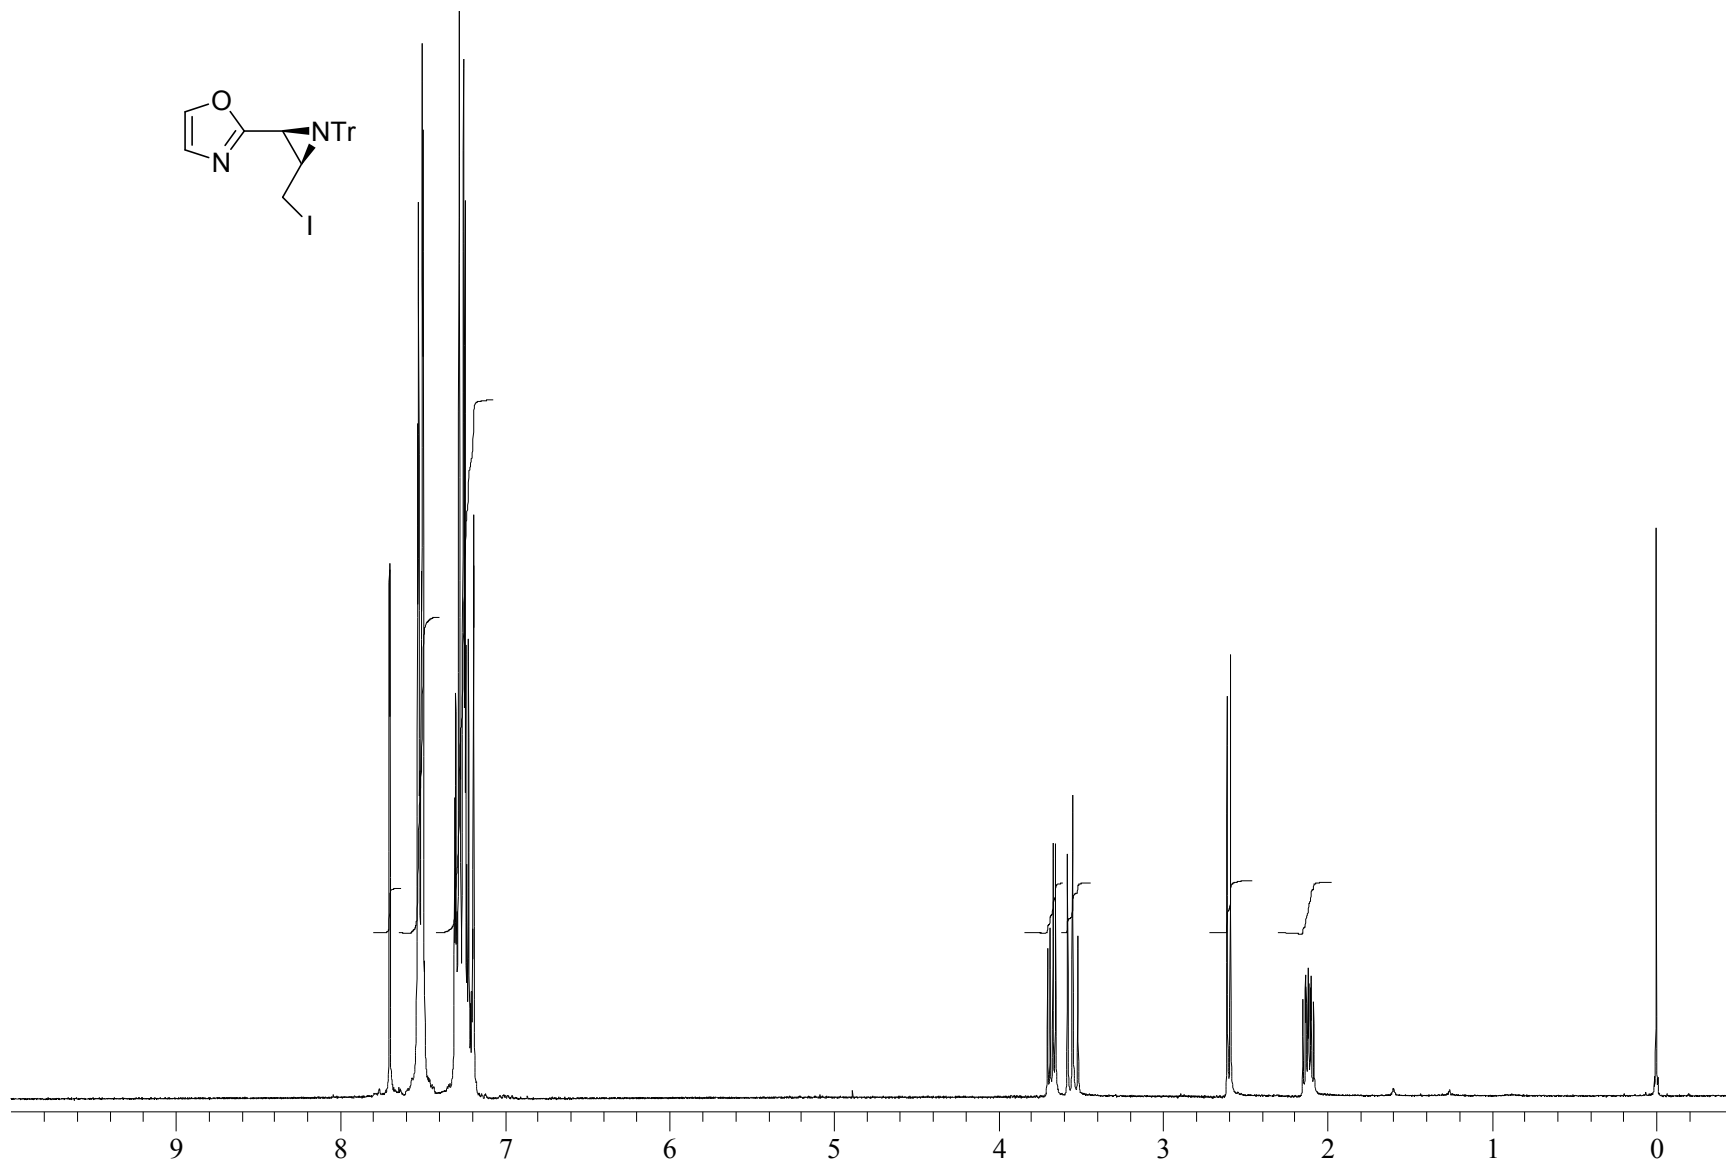

dlw:R9\_1a

Pulse Sequence: s2pul  
Solvent: CDCl3  
Ambient Temperature  
INOVA-400 "Zr"

PULSE SEQUENCE  
Relax. delay 0.900 sec  
Pulse 45.0 degrees  
Acq. time 1.199 sec  
Width 25000.0 Hz  
98 repetitions

OBSERVE C13, 100.5212754 MHz  
DECOUPLE H1, 399.3668644 MHz  
Power 04 dB  
continuously on  
WALTZ-16 modulated  
DATA PROCESSING  
Line broadening 1.0 Hz  
FT size 65536  
Total time 35 min, 58 sec

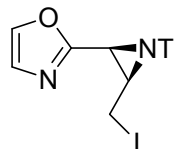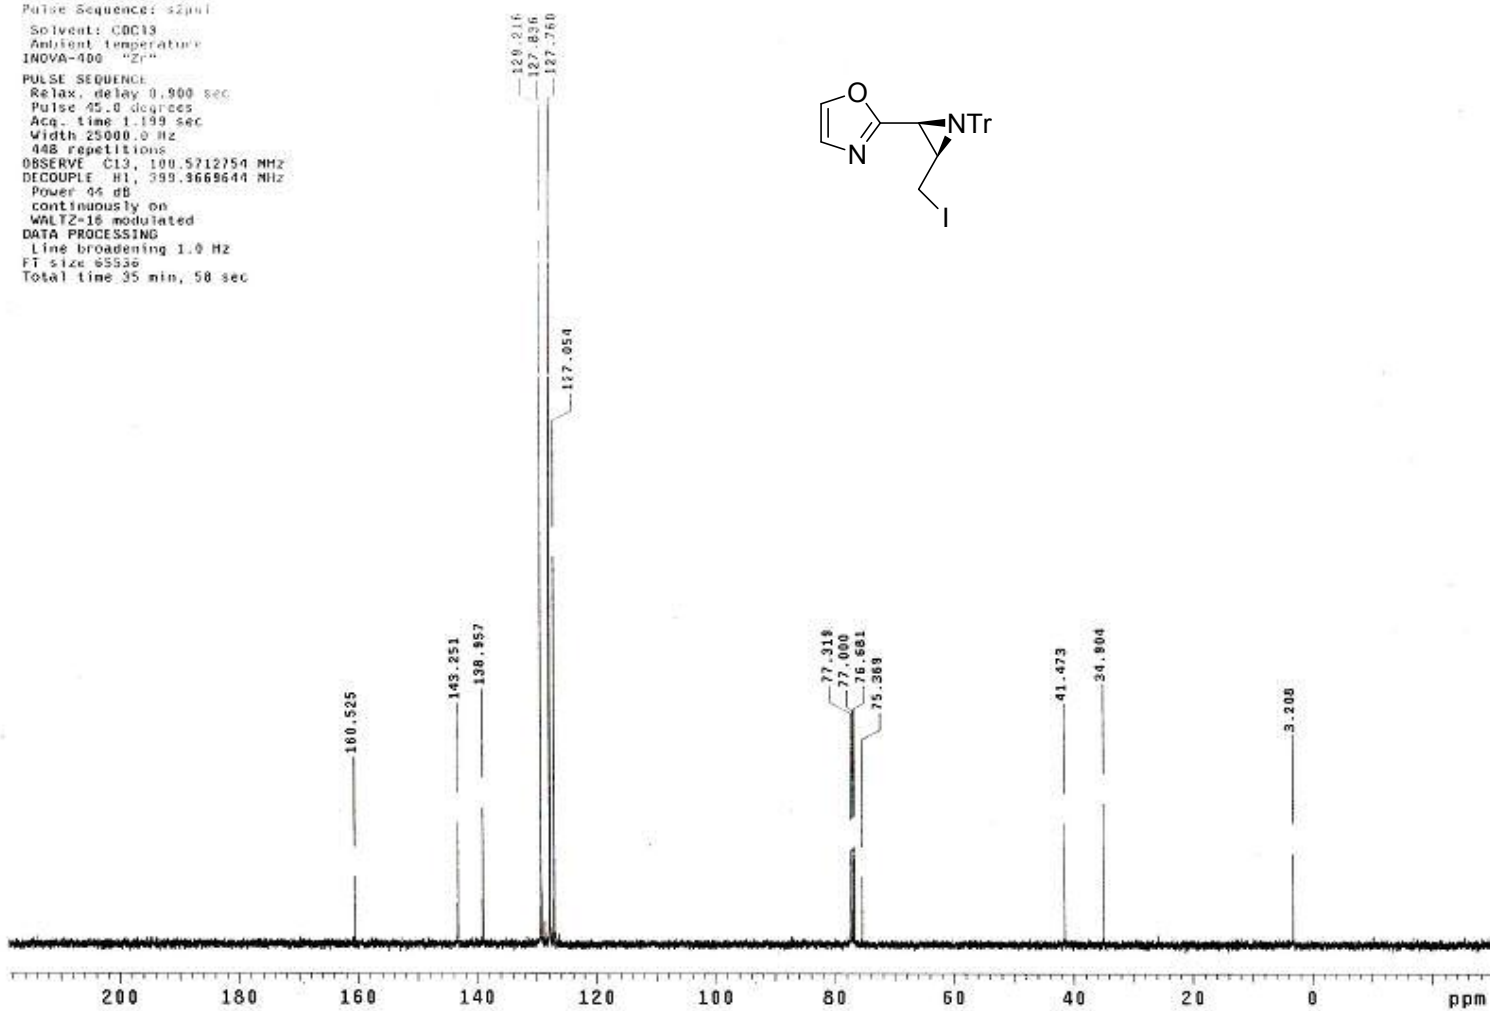

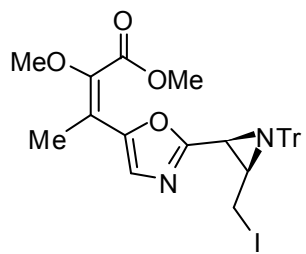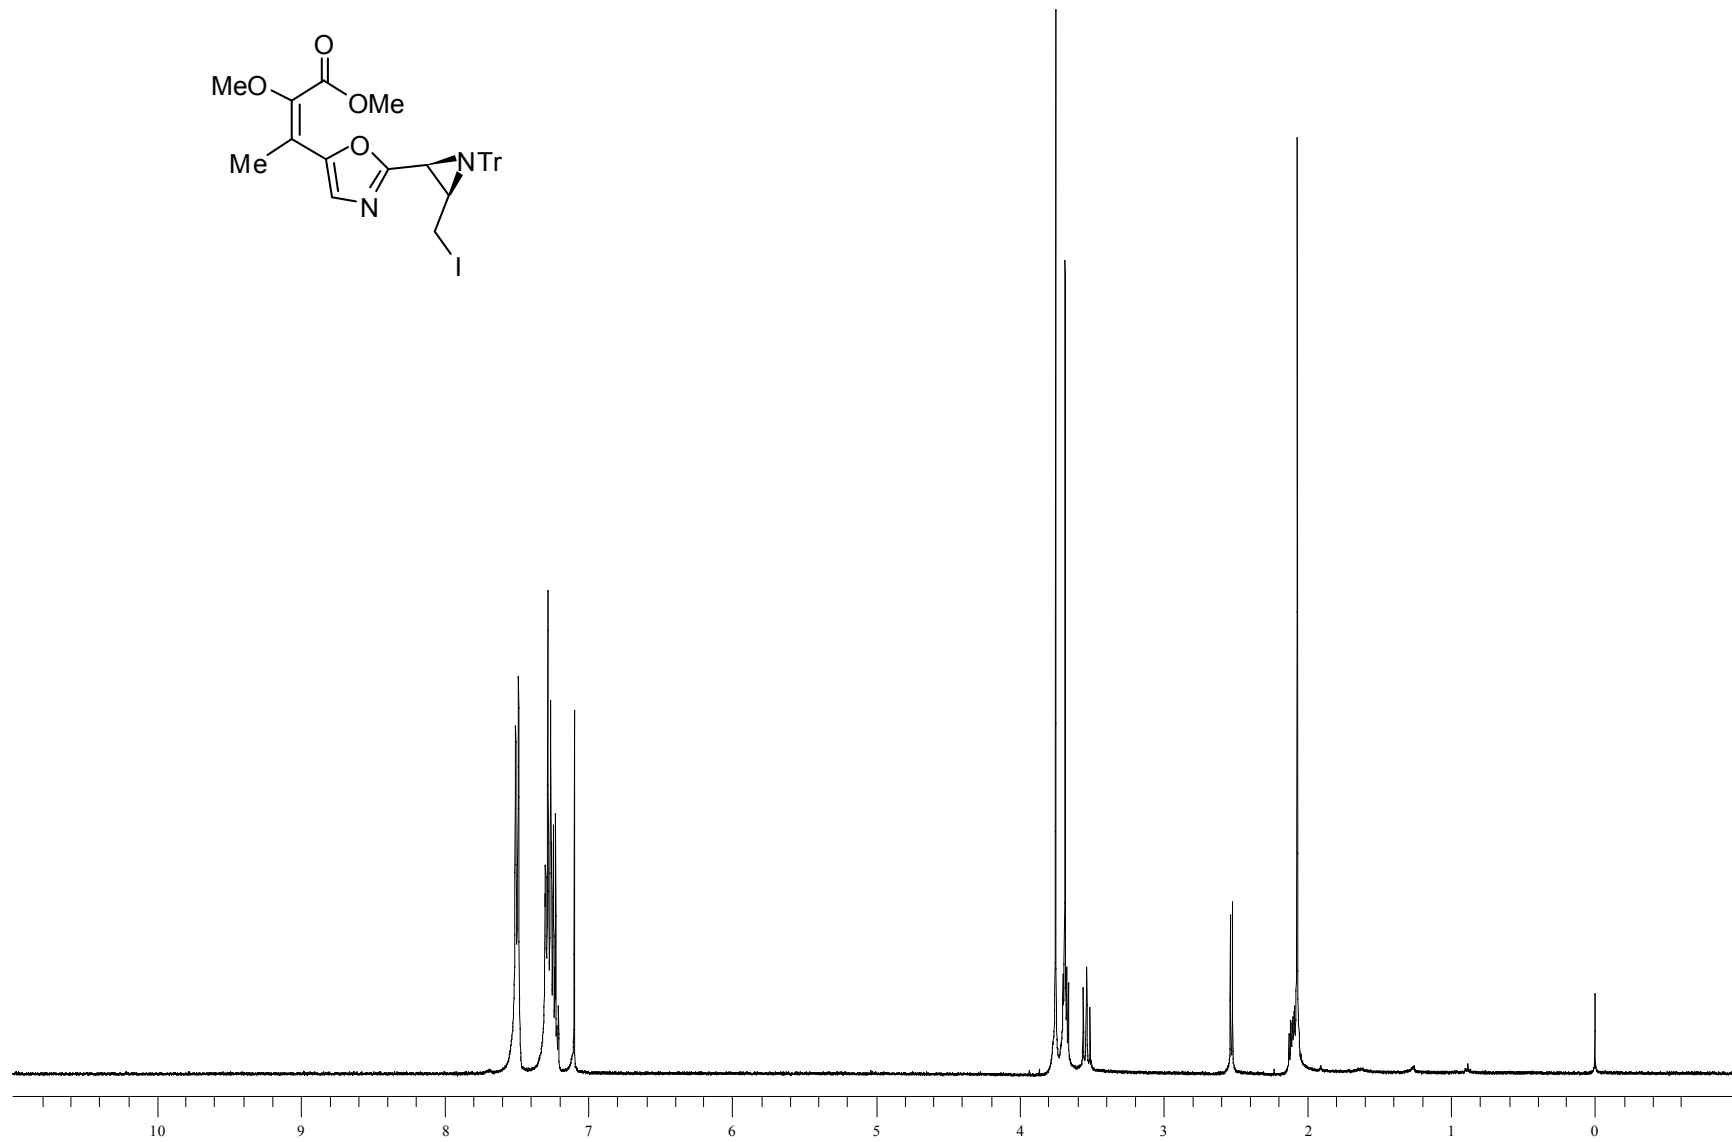

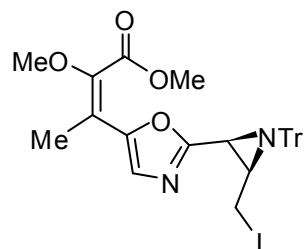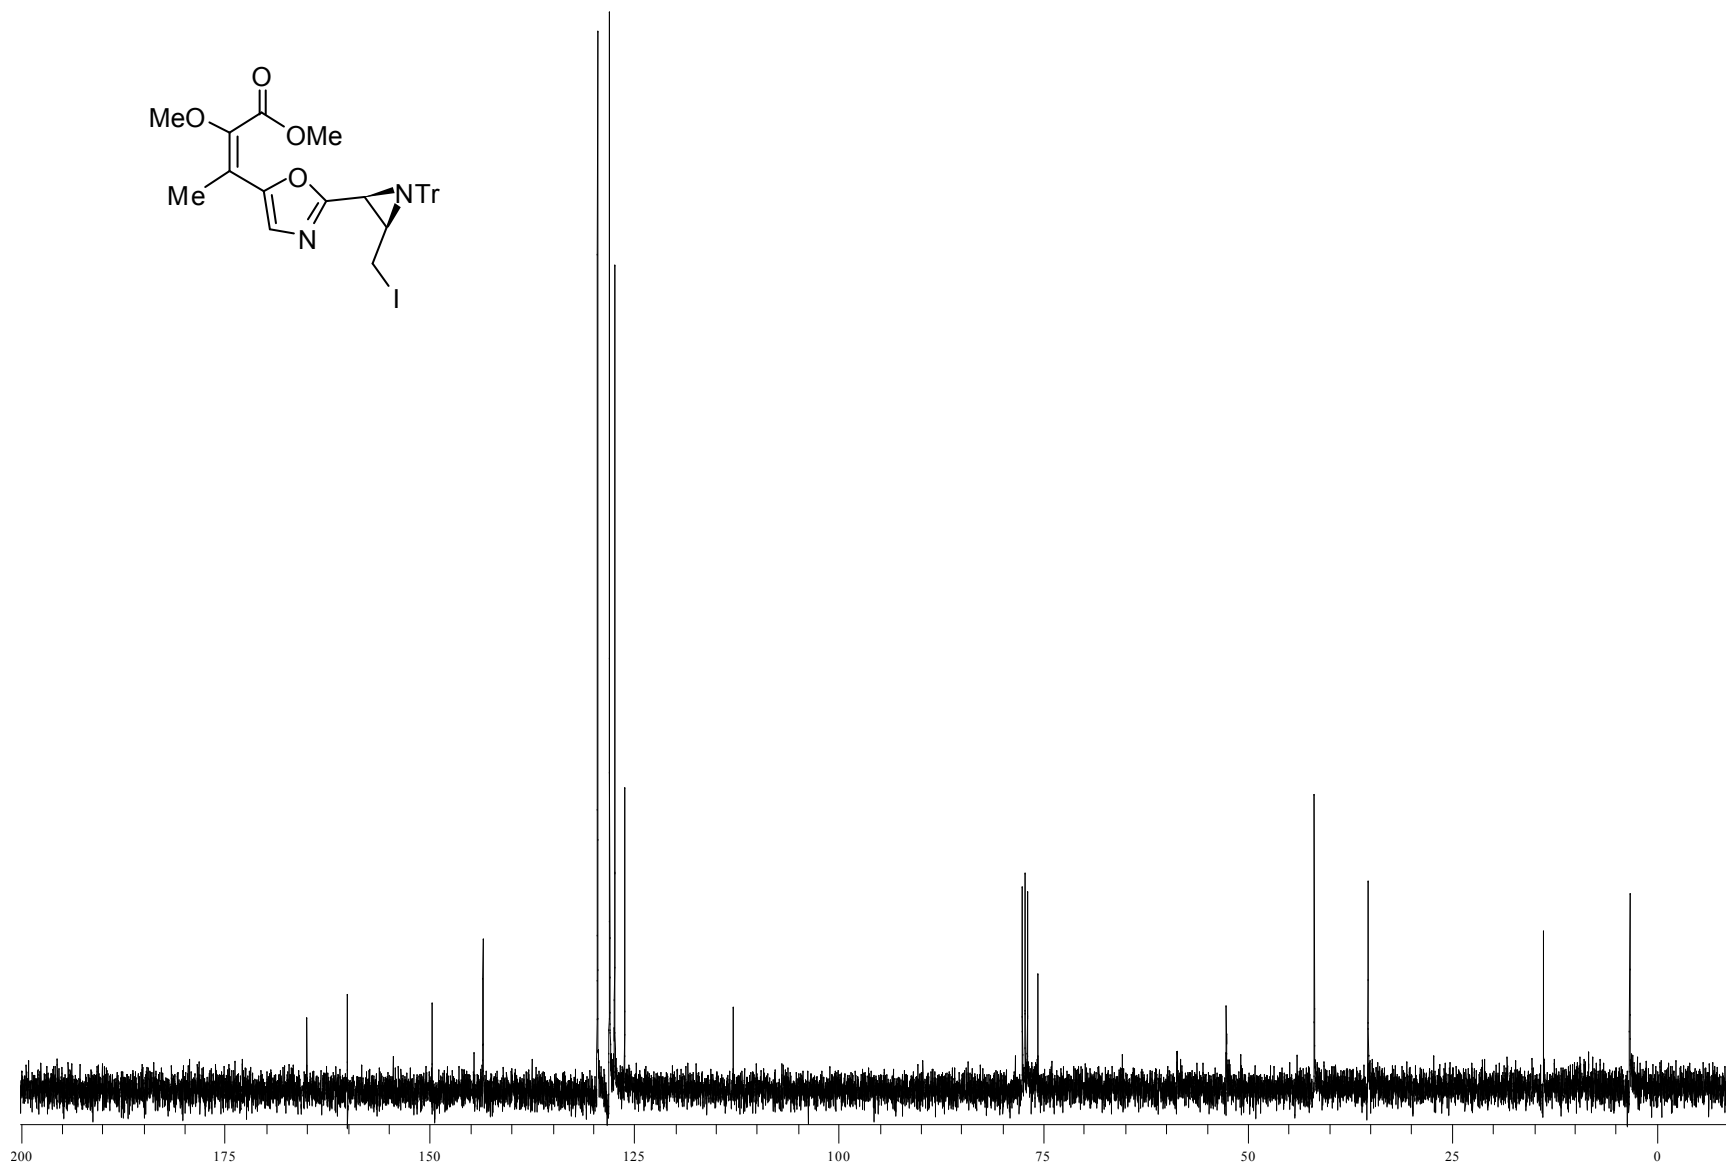

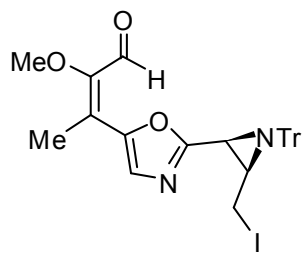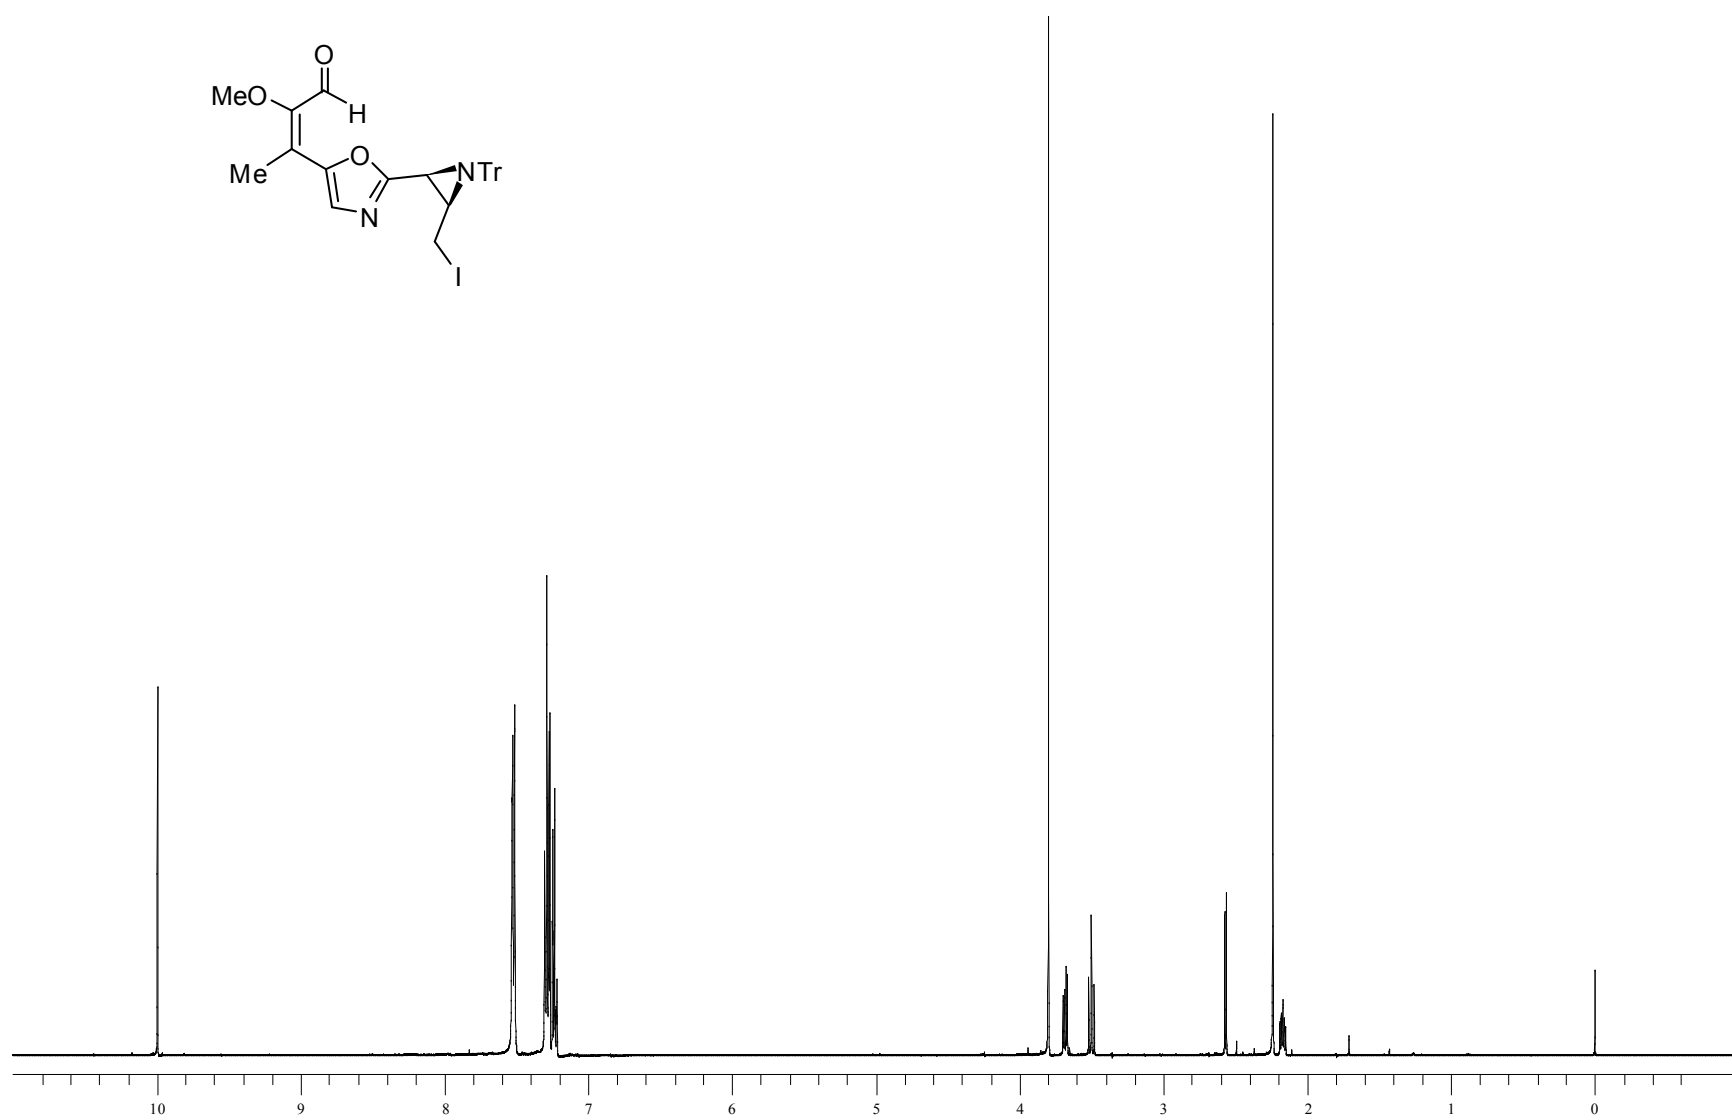

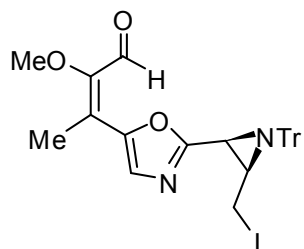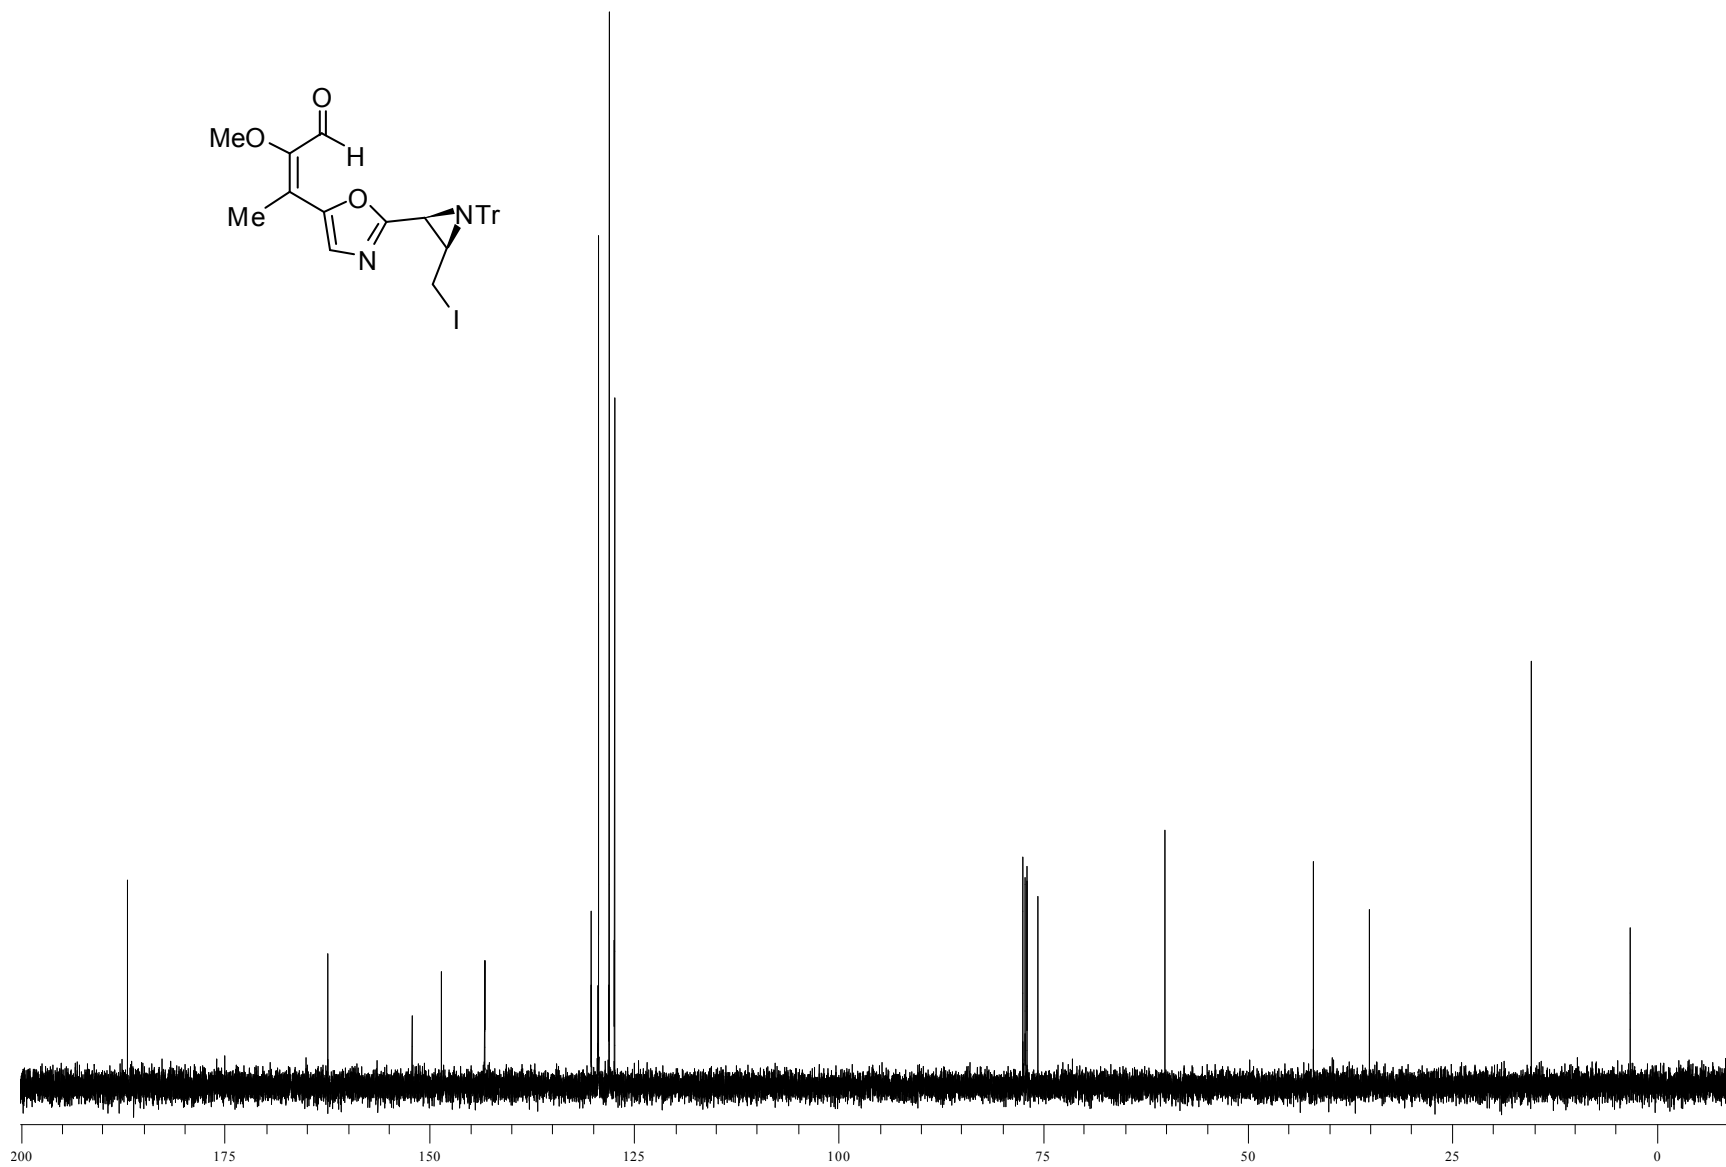



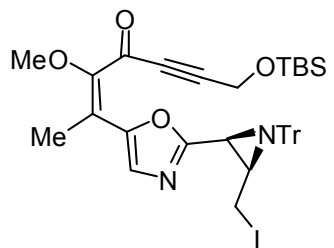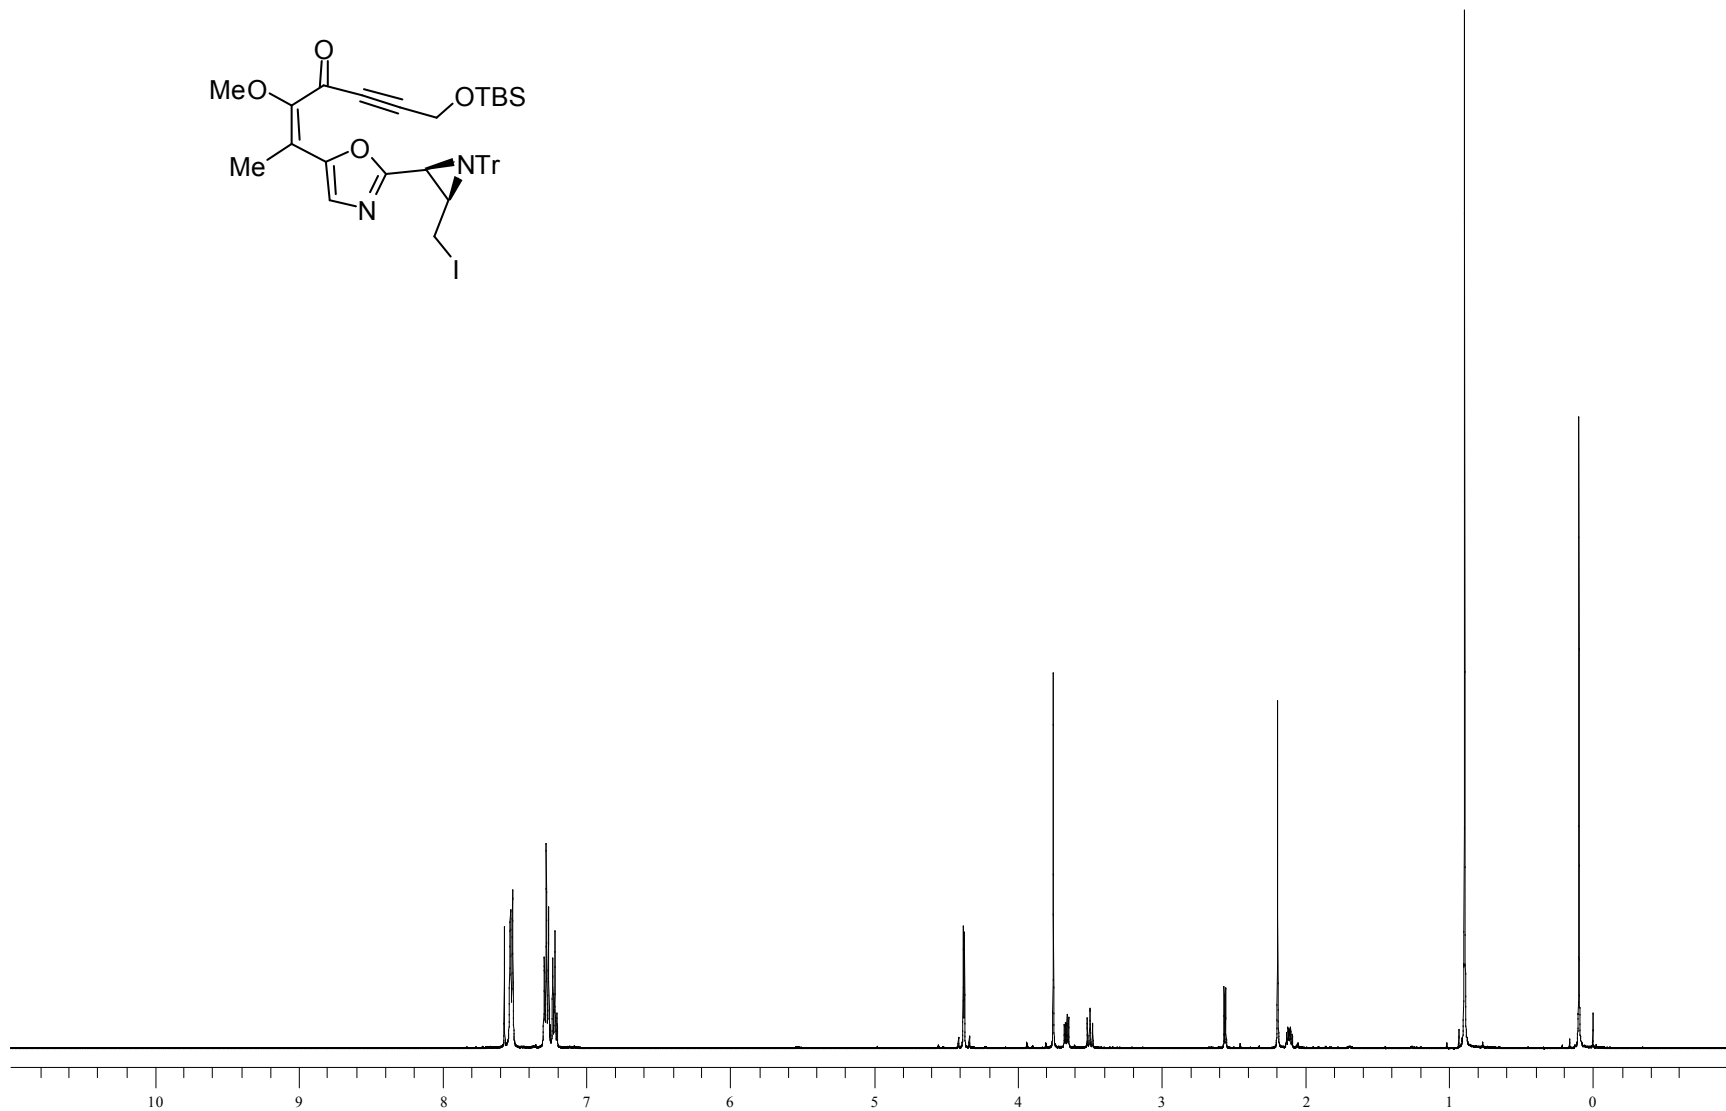

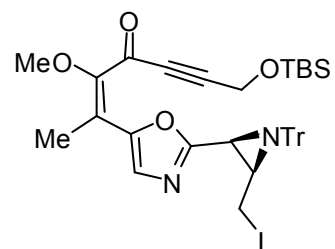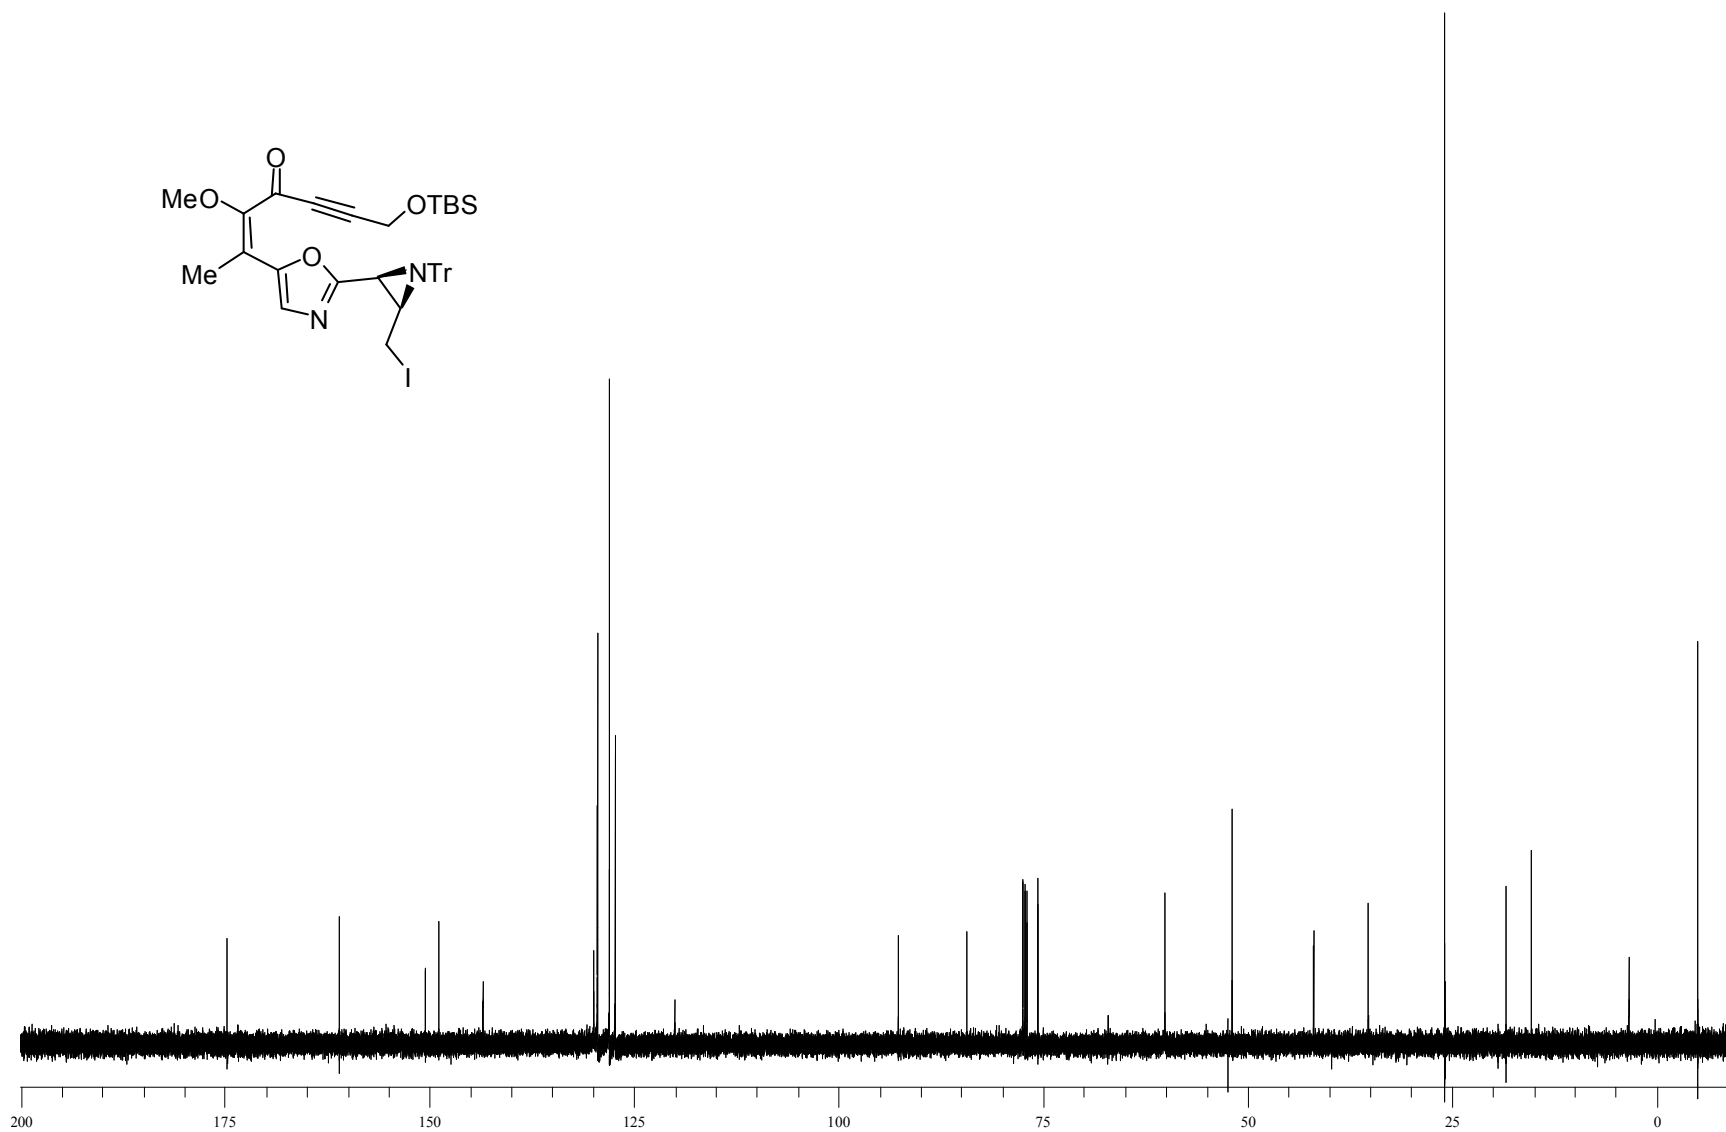

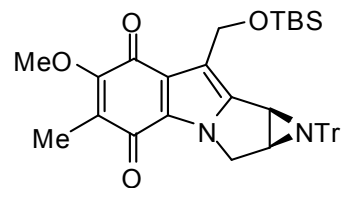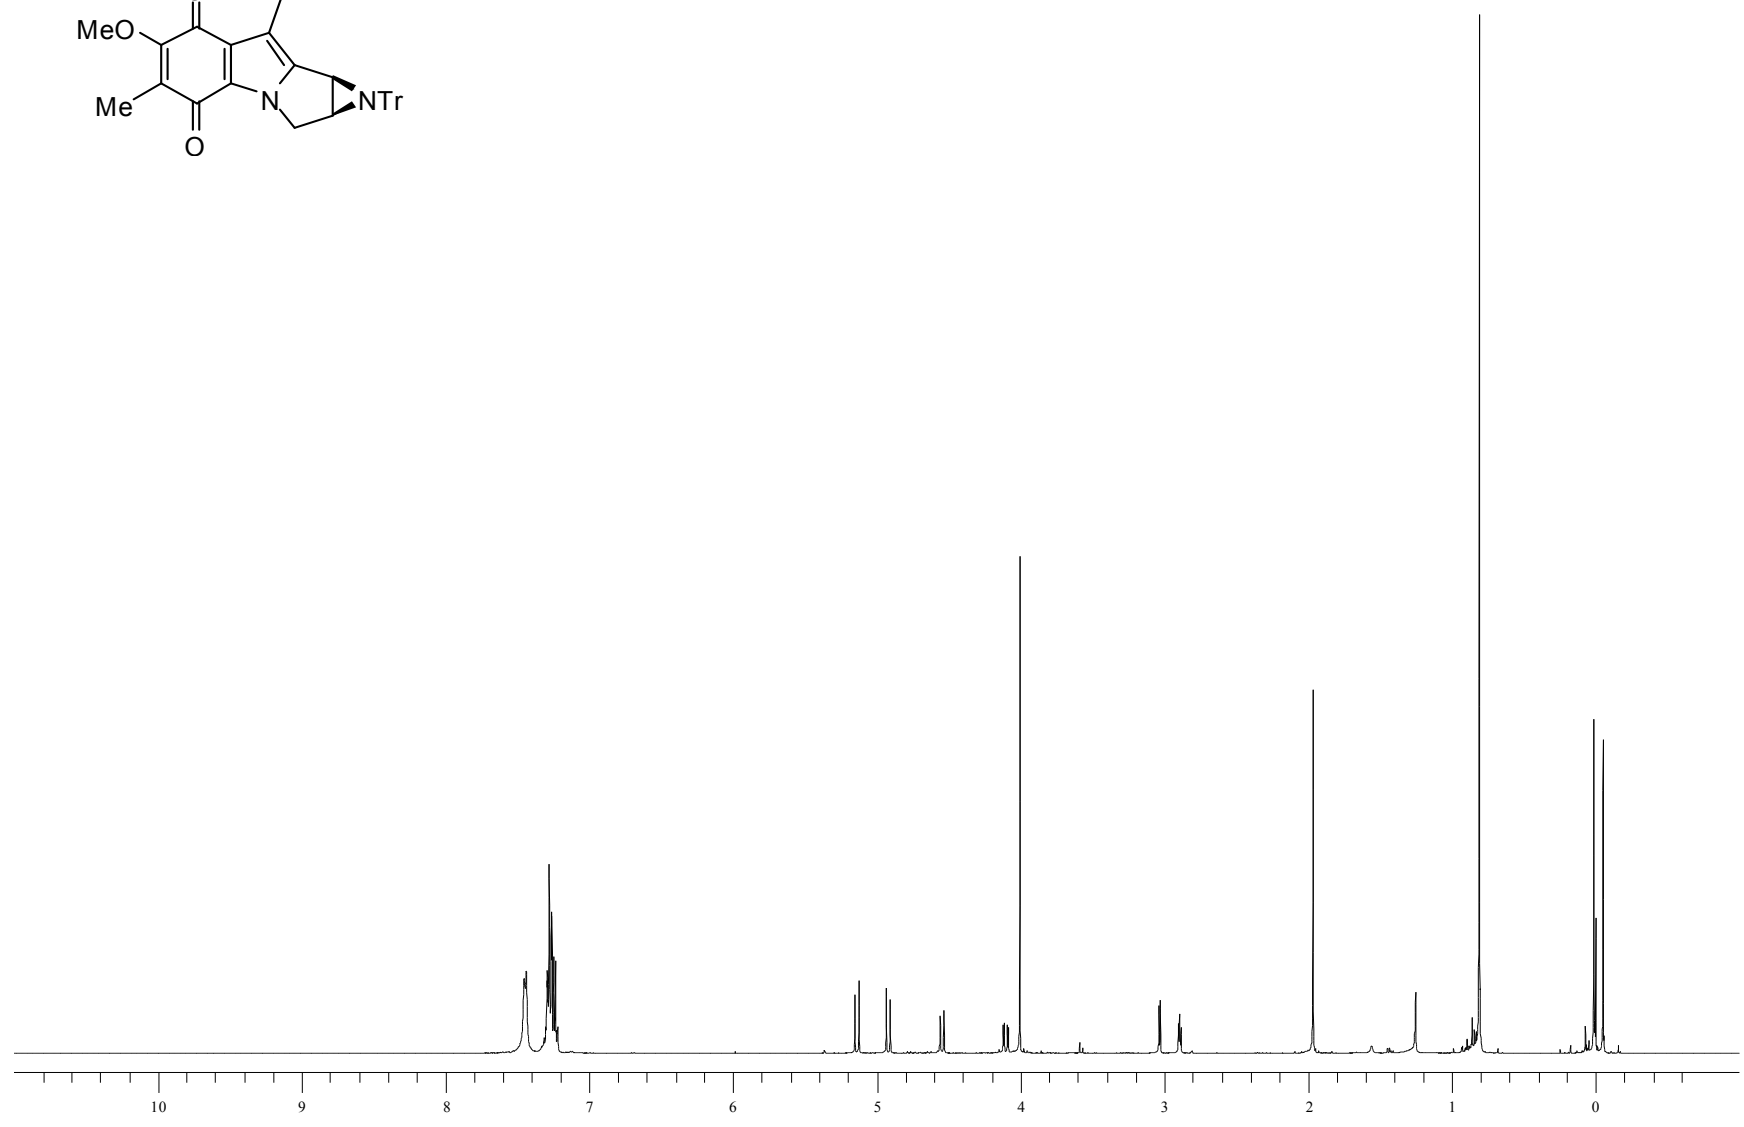

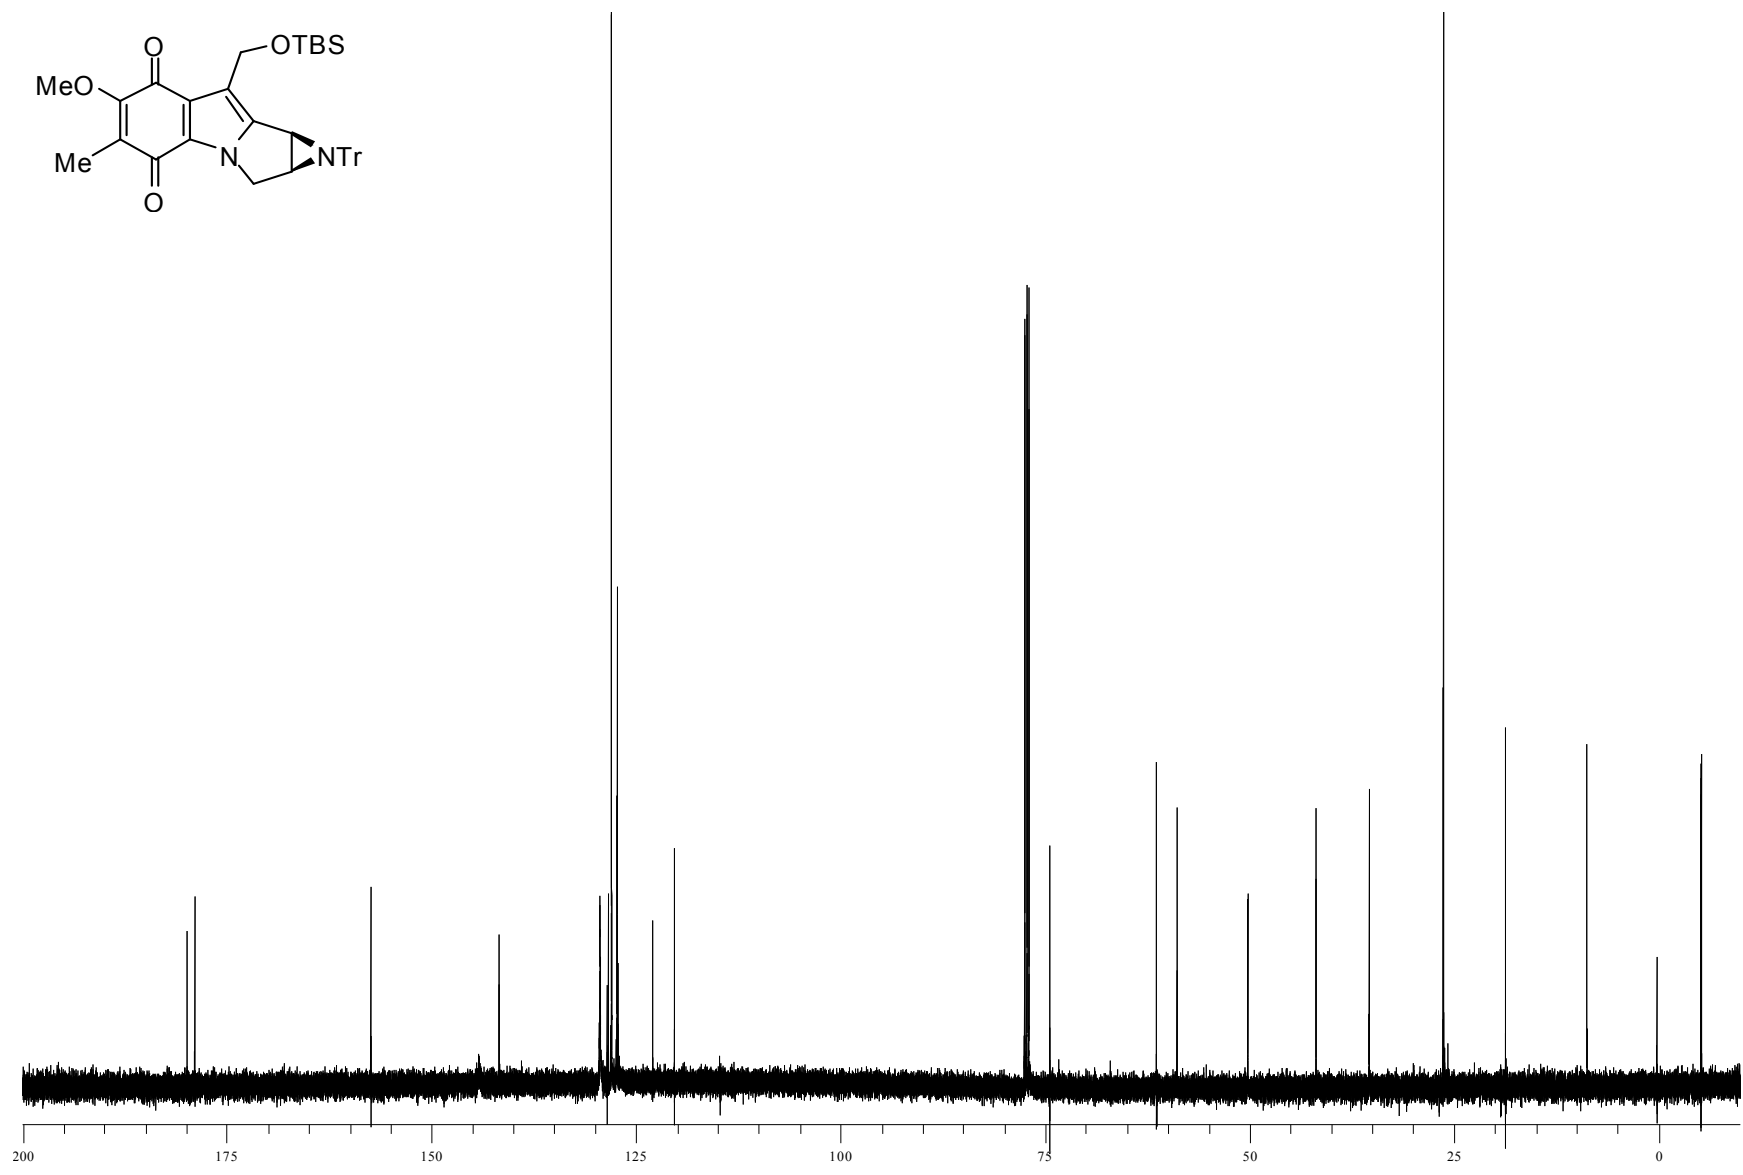

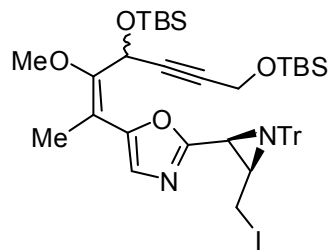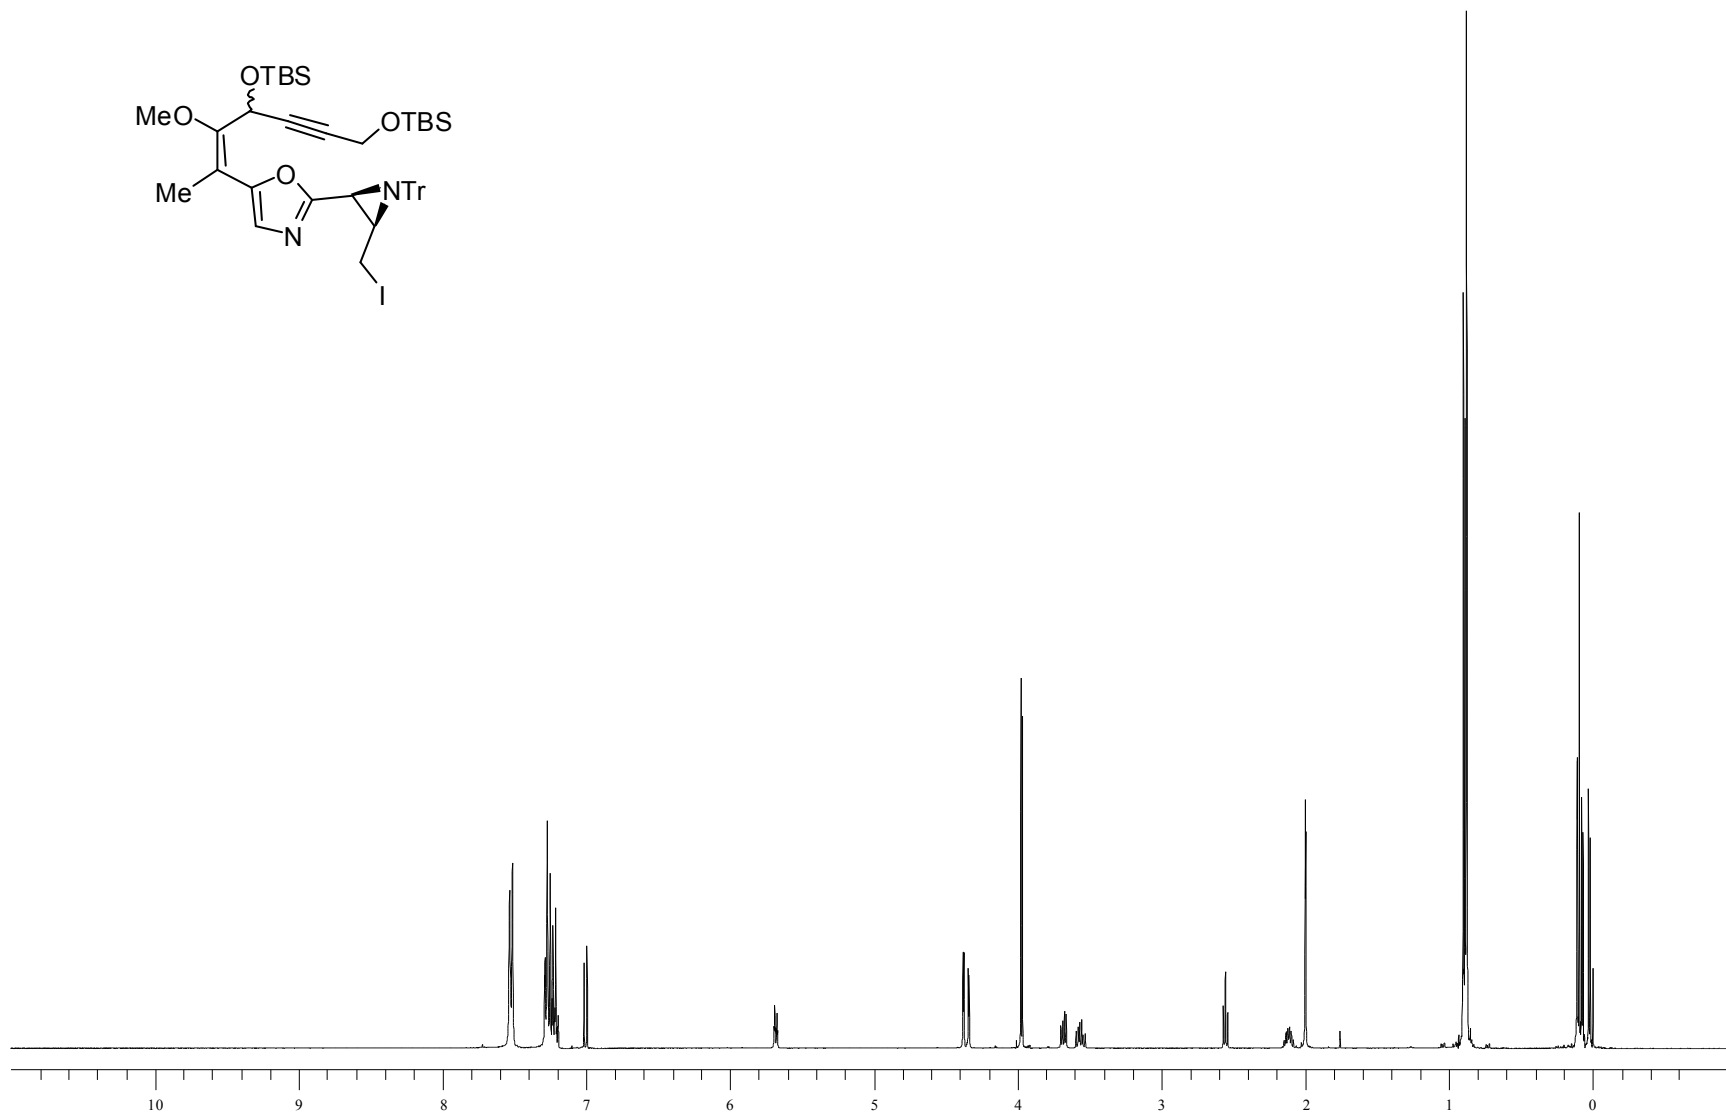

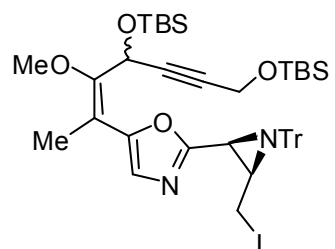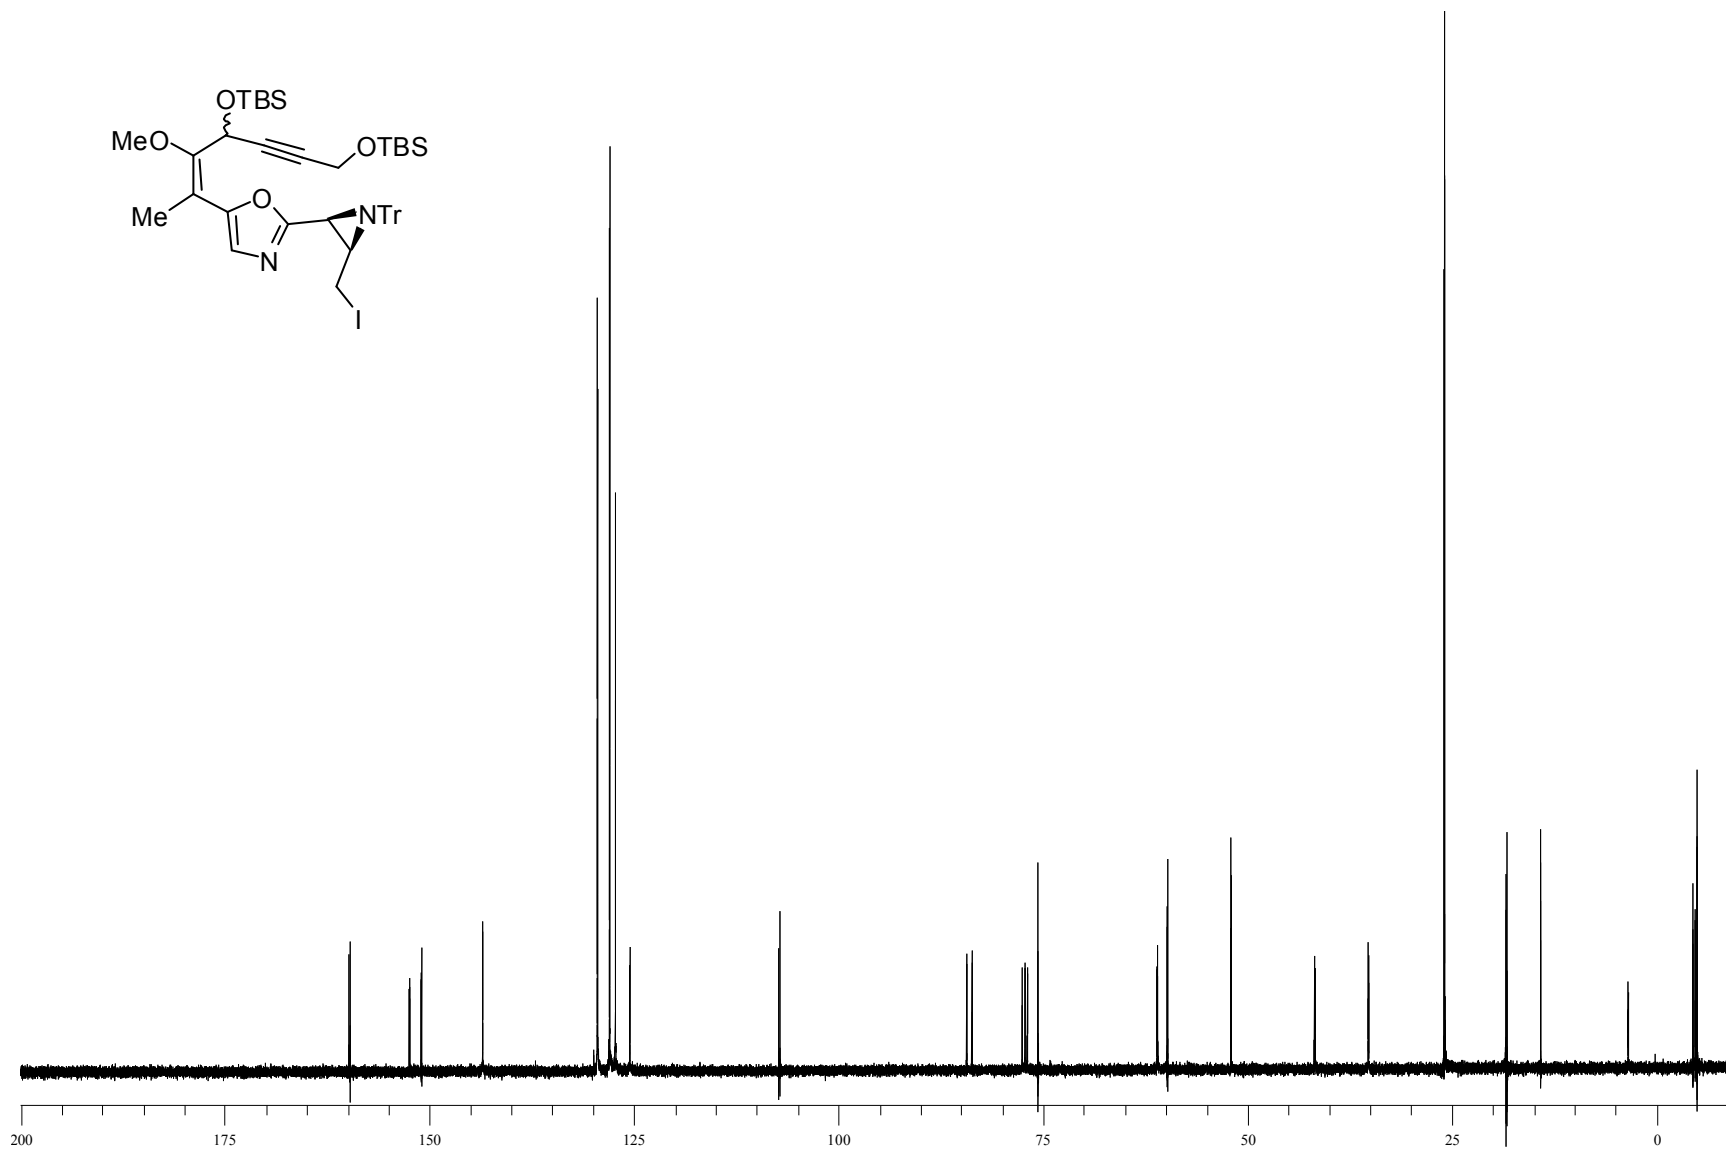

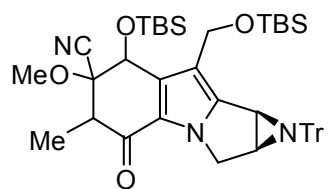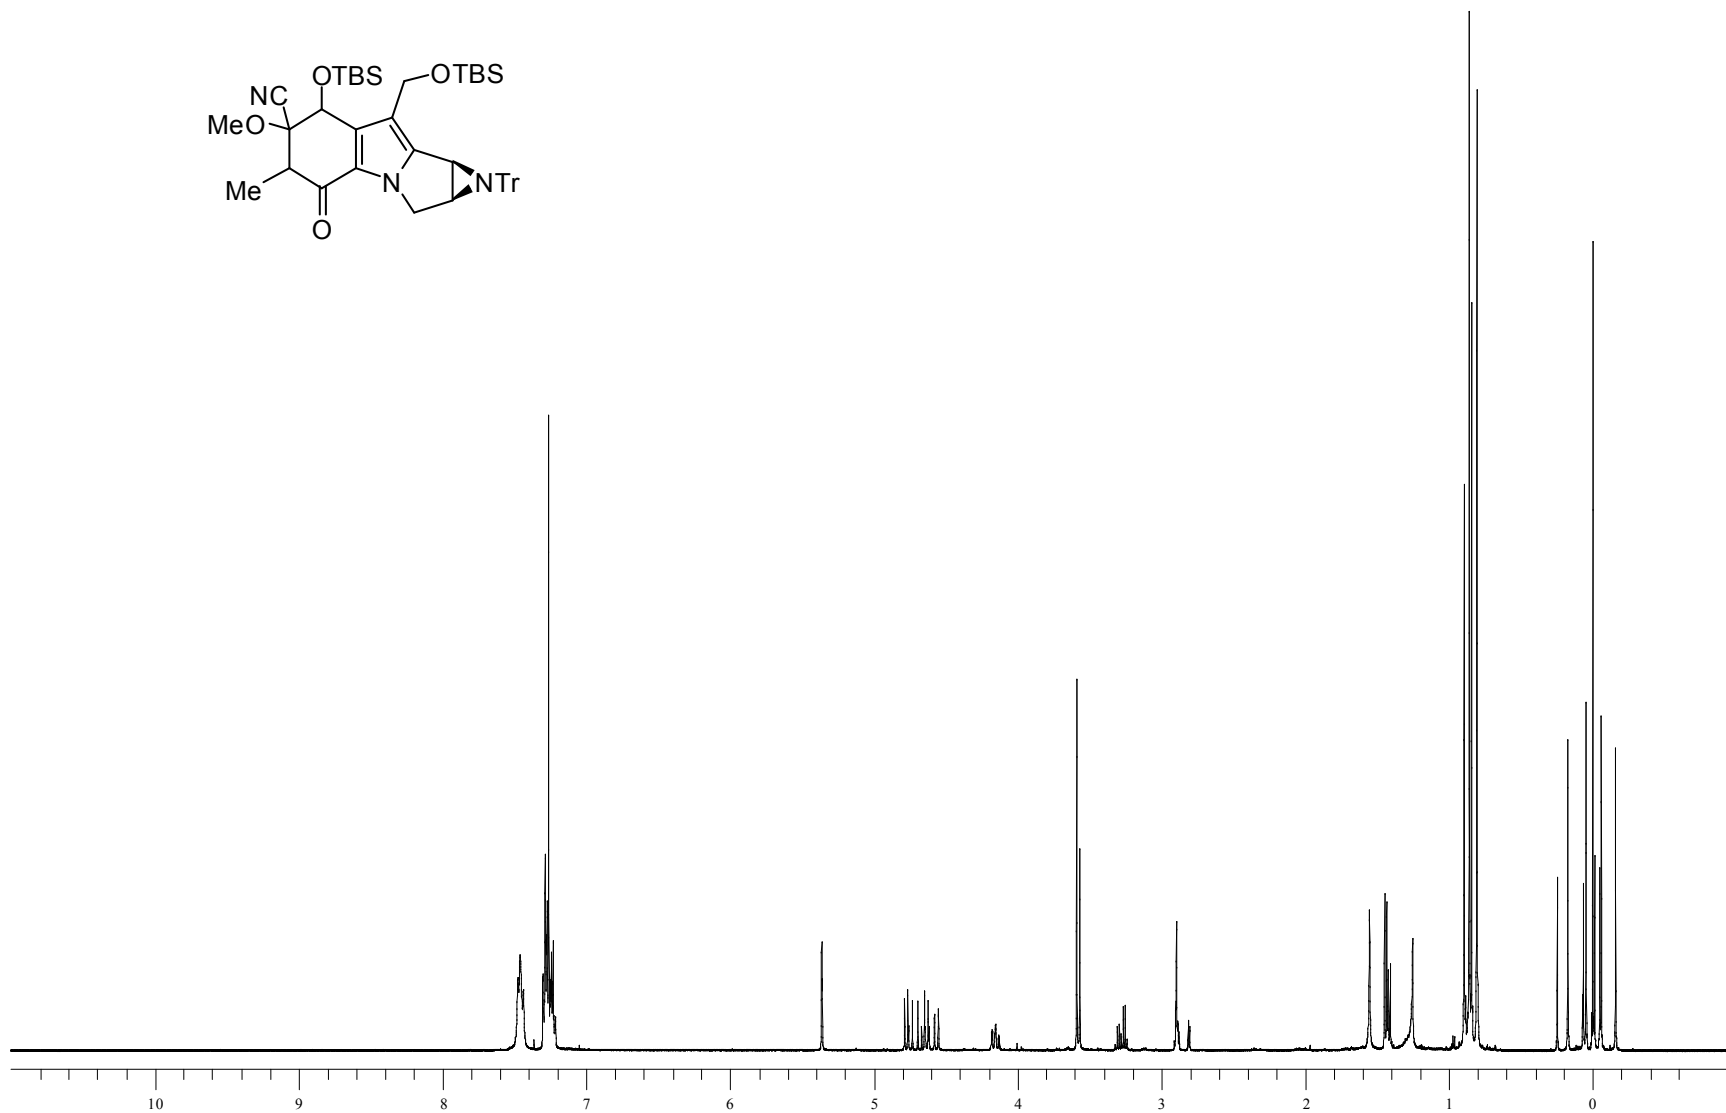

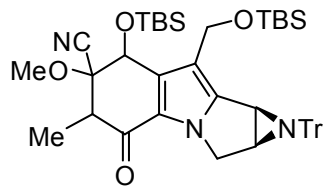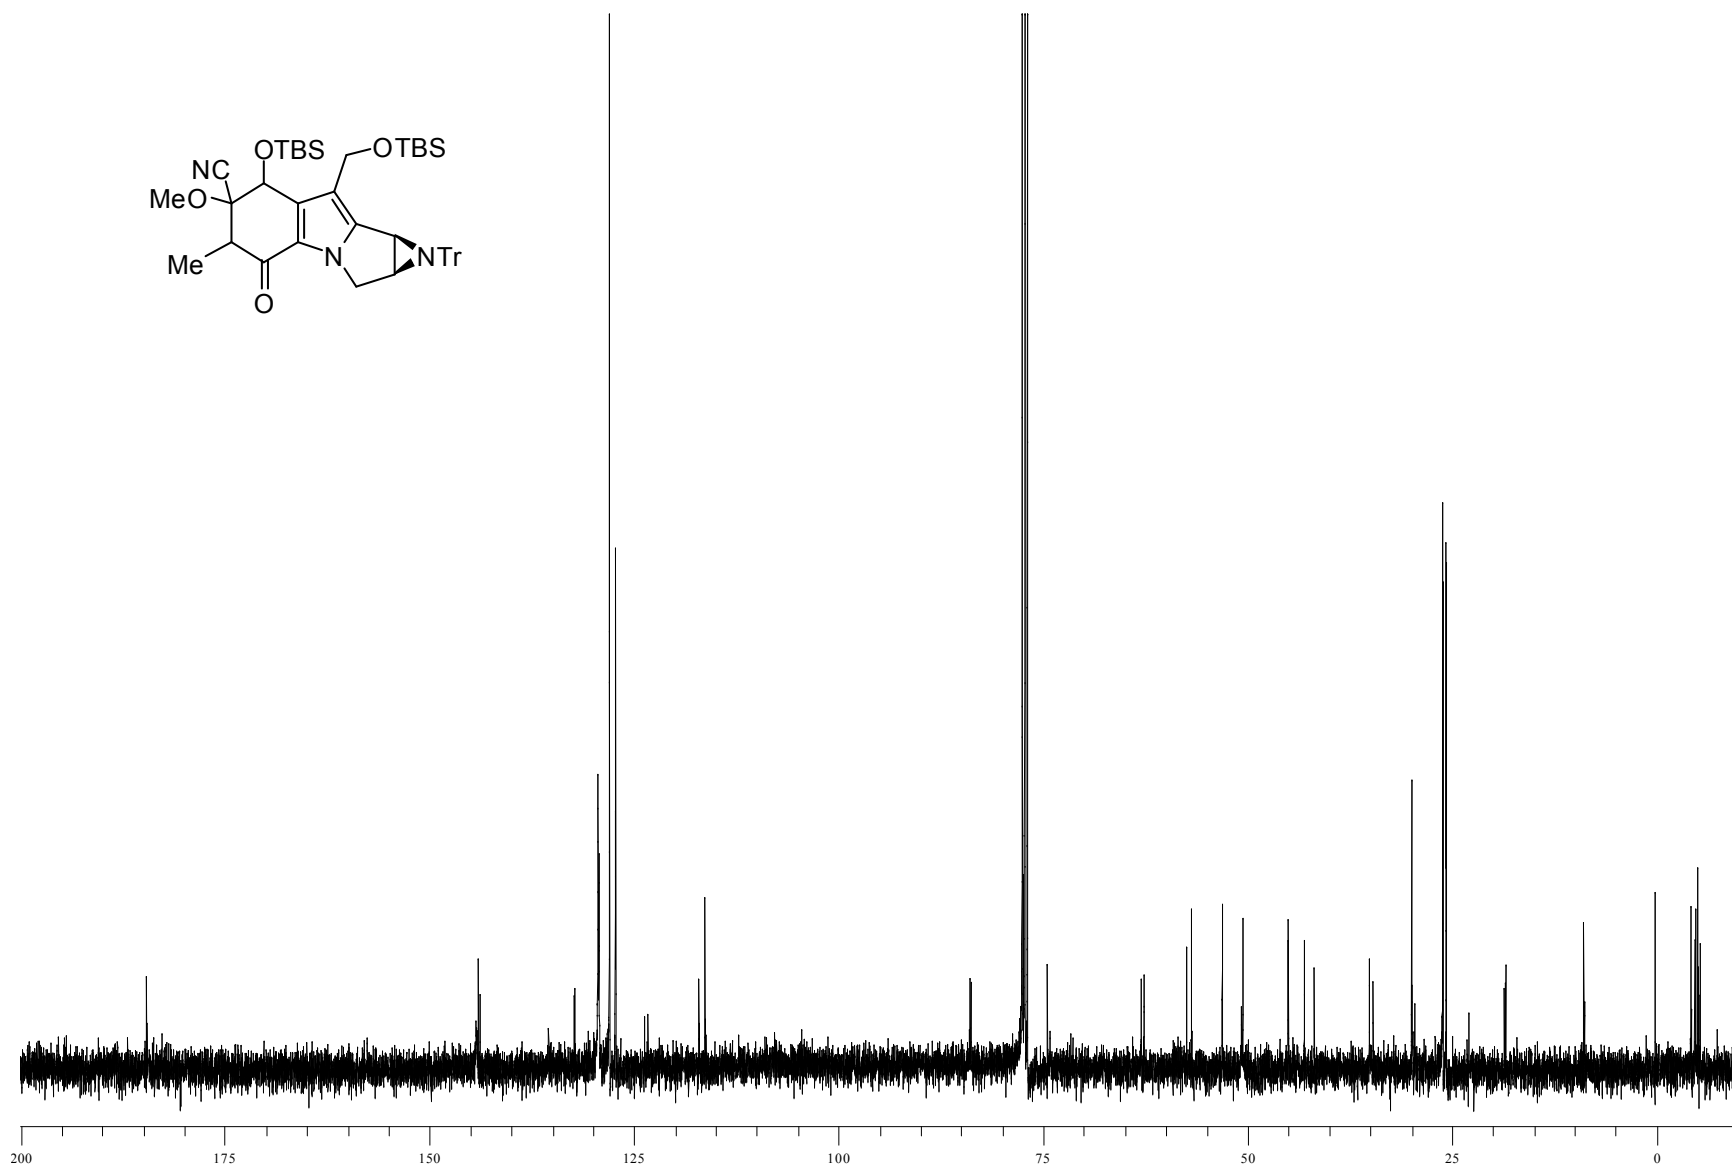



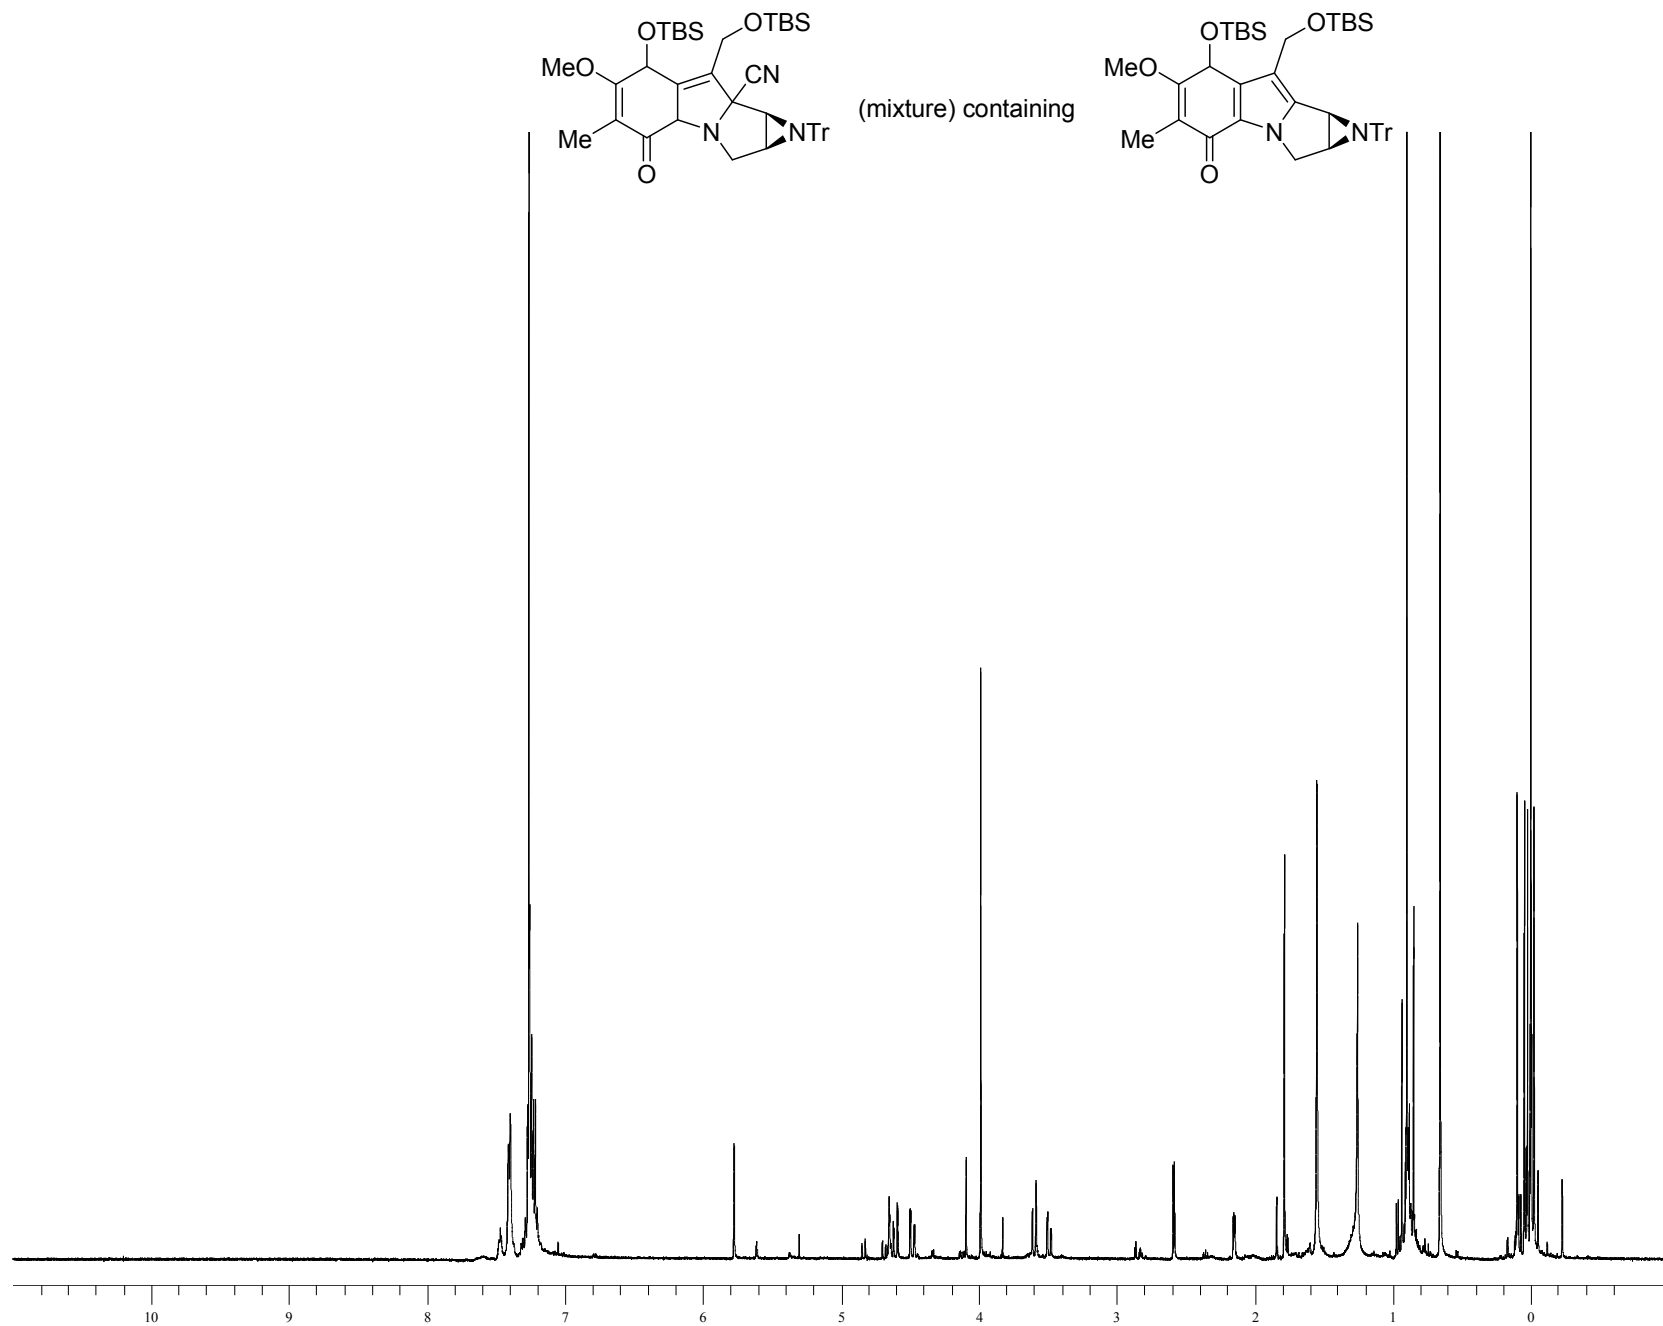

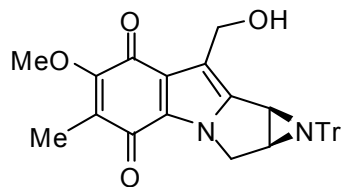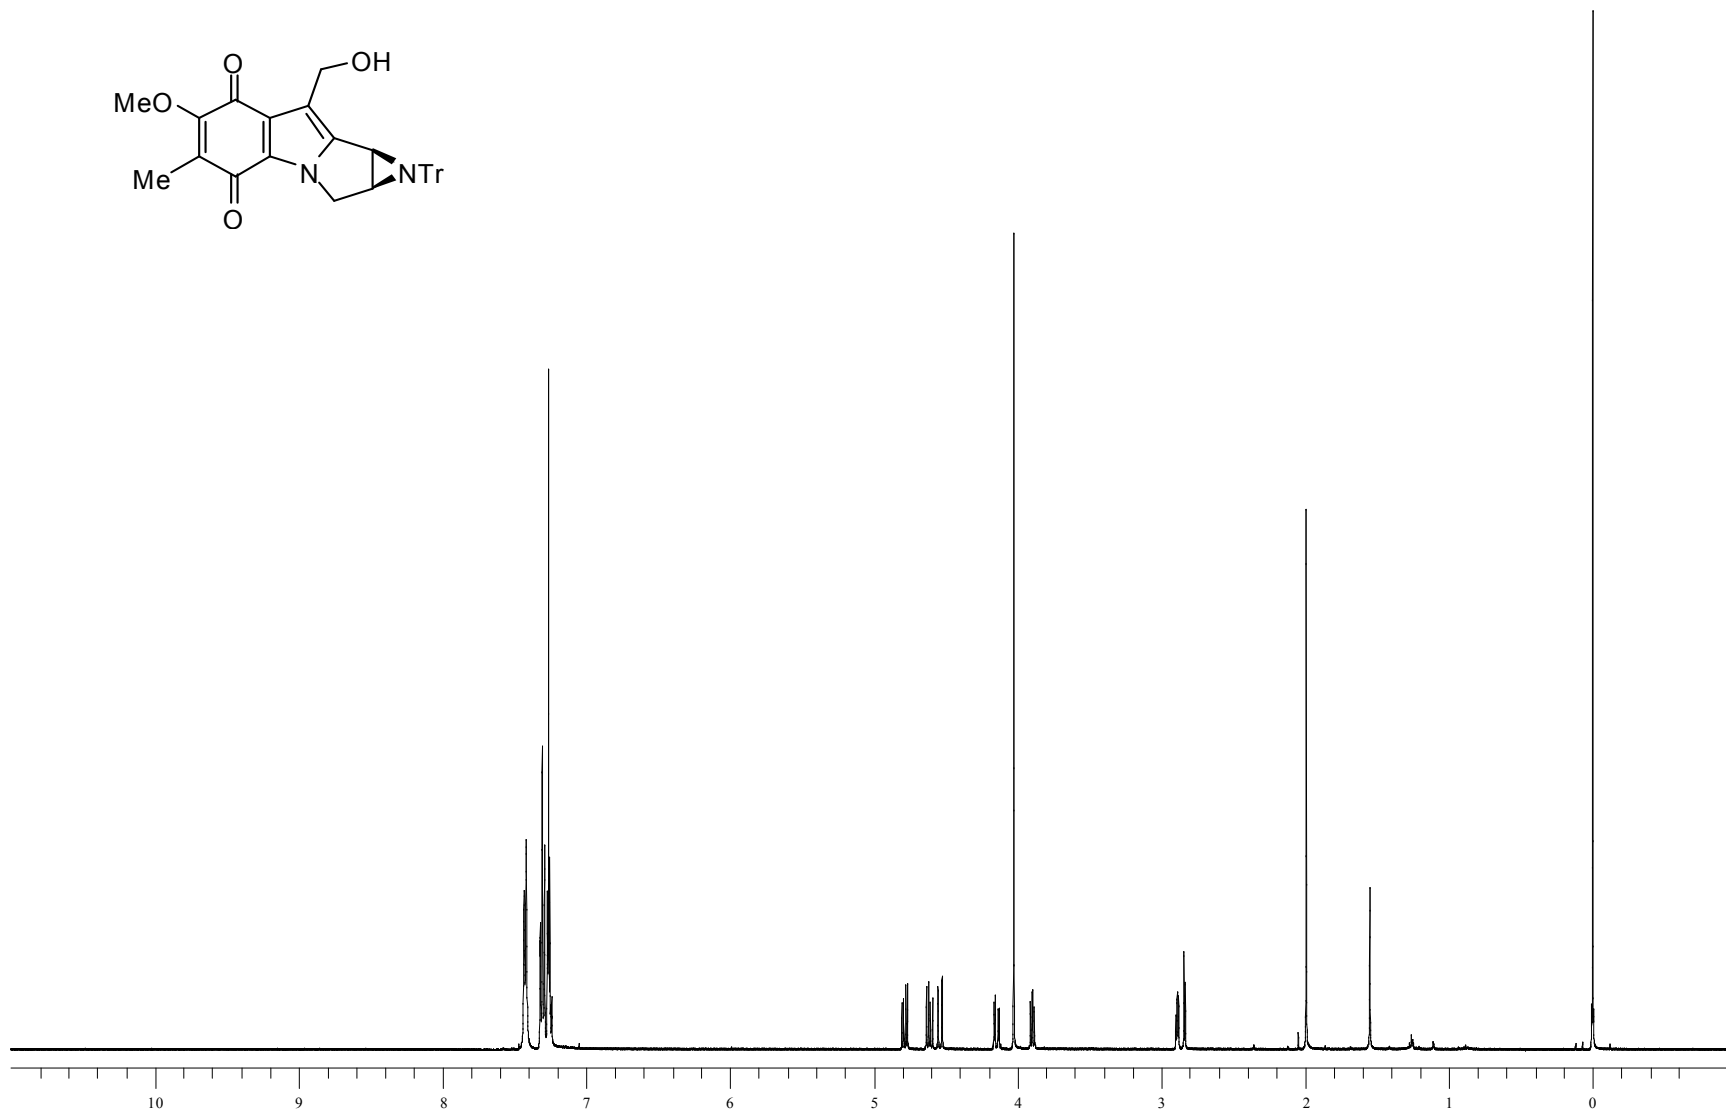

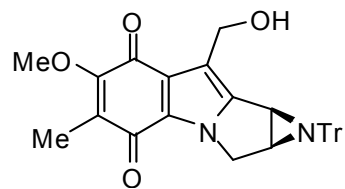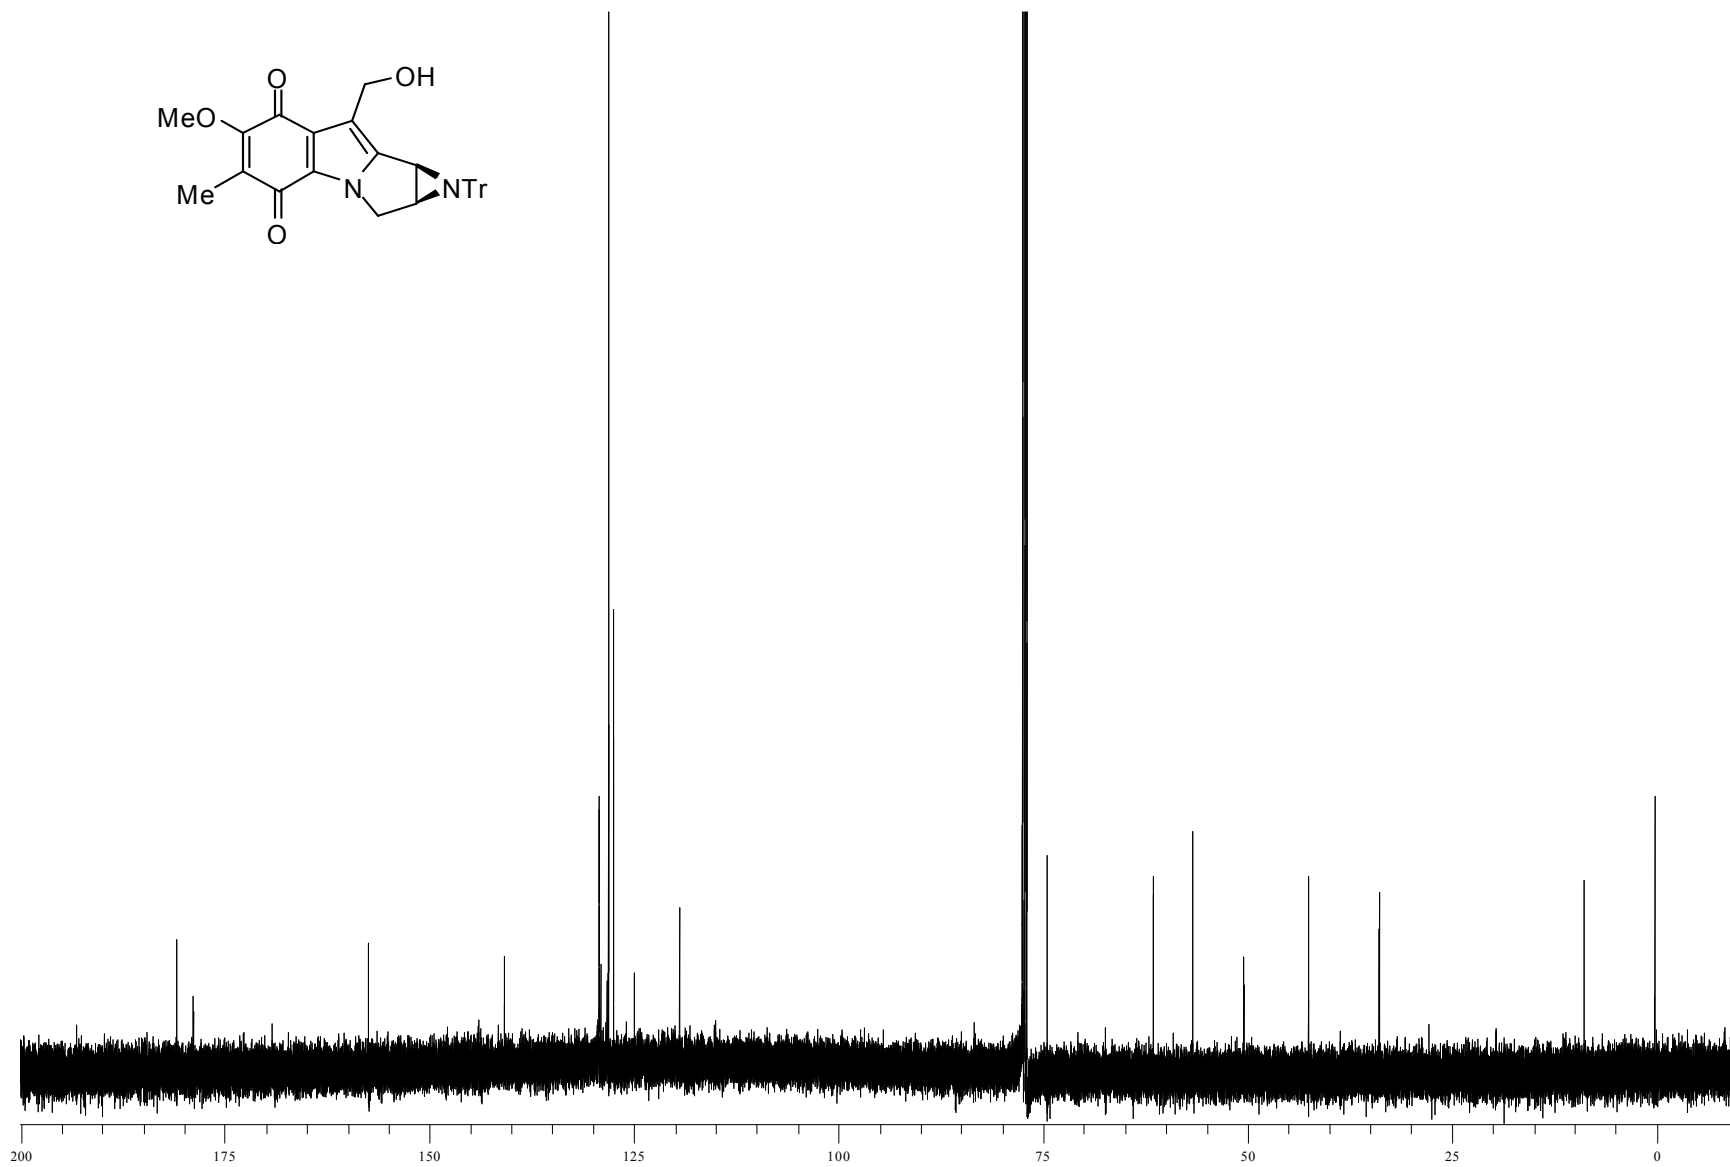

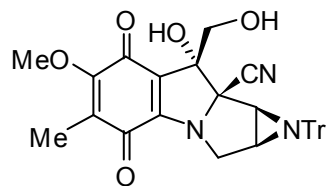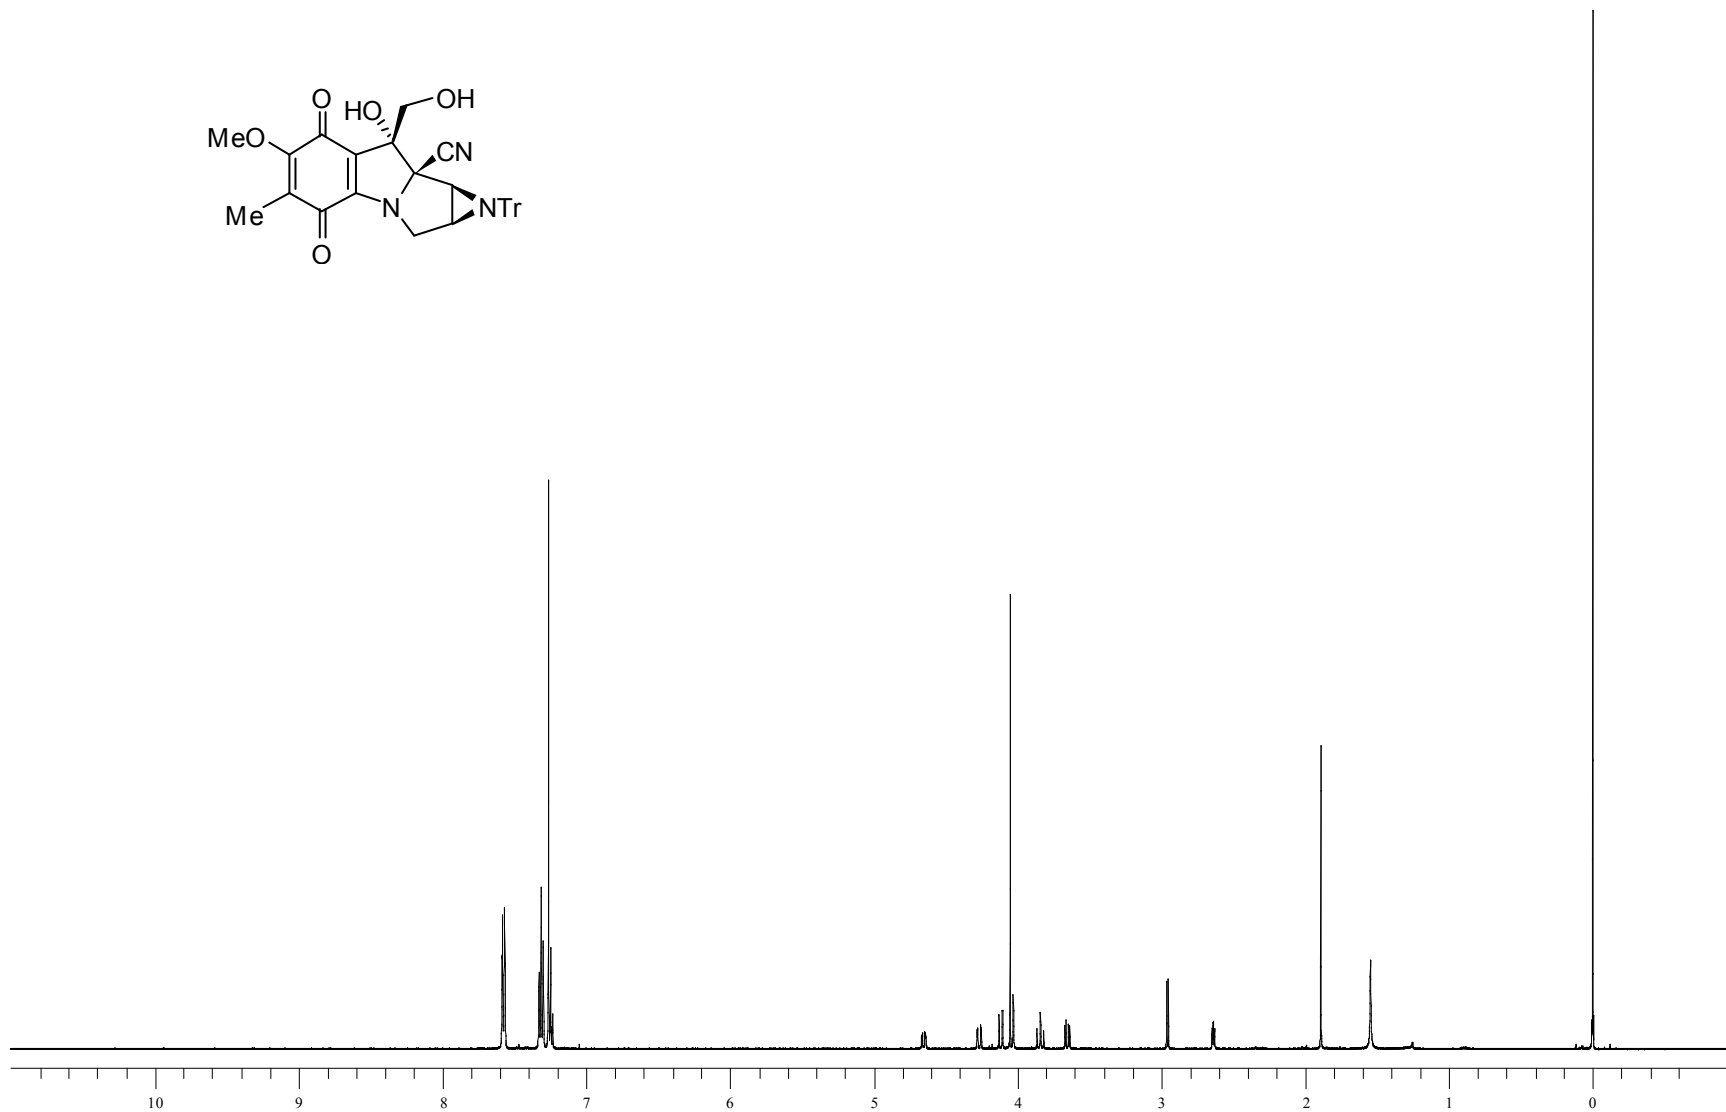

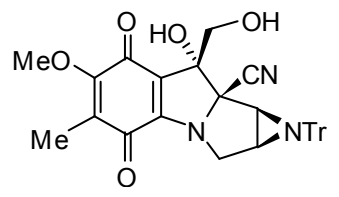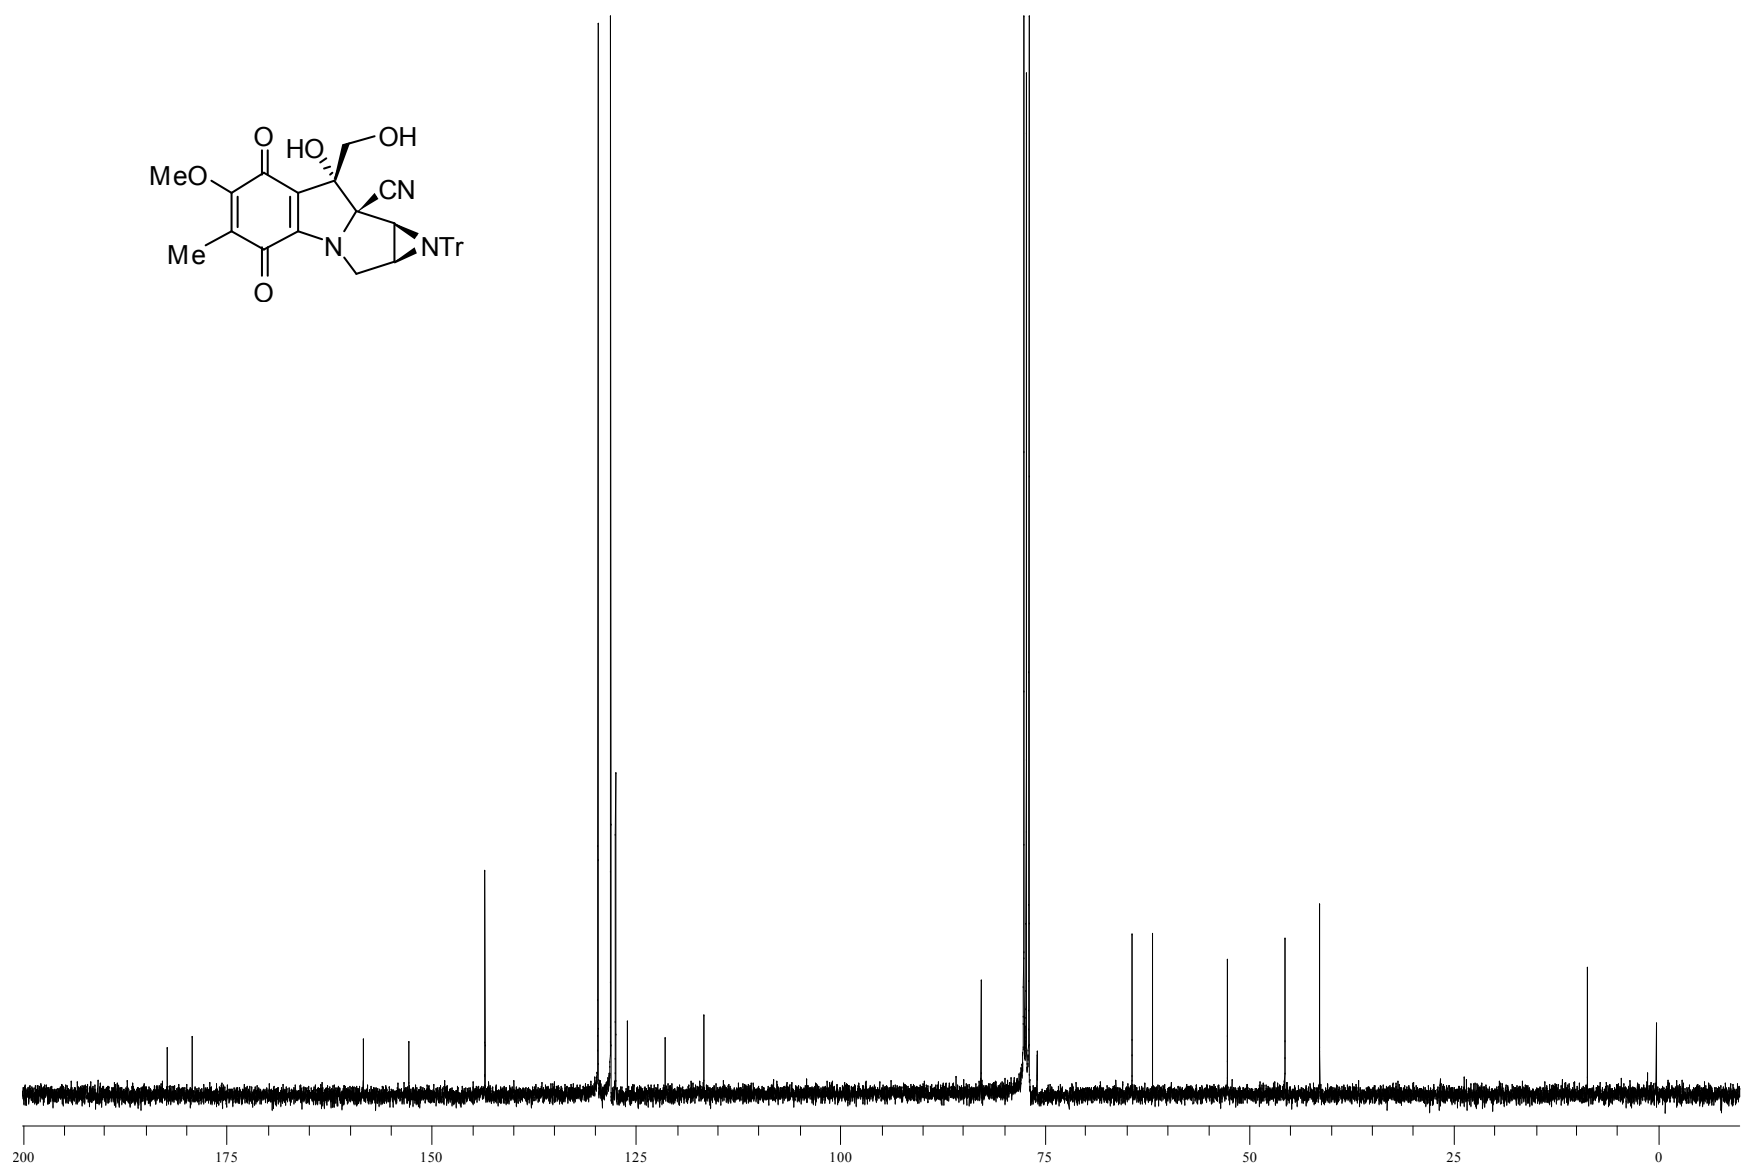

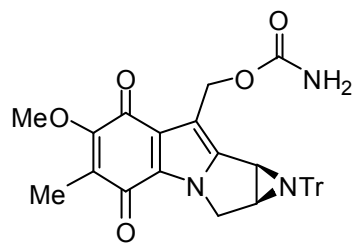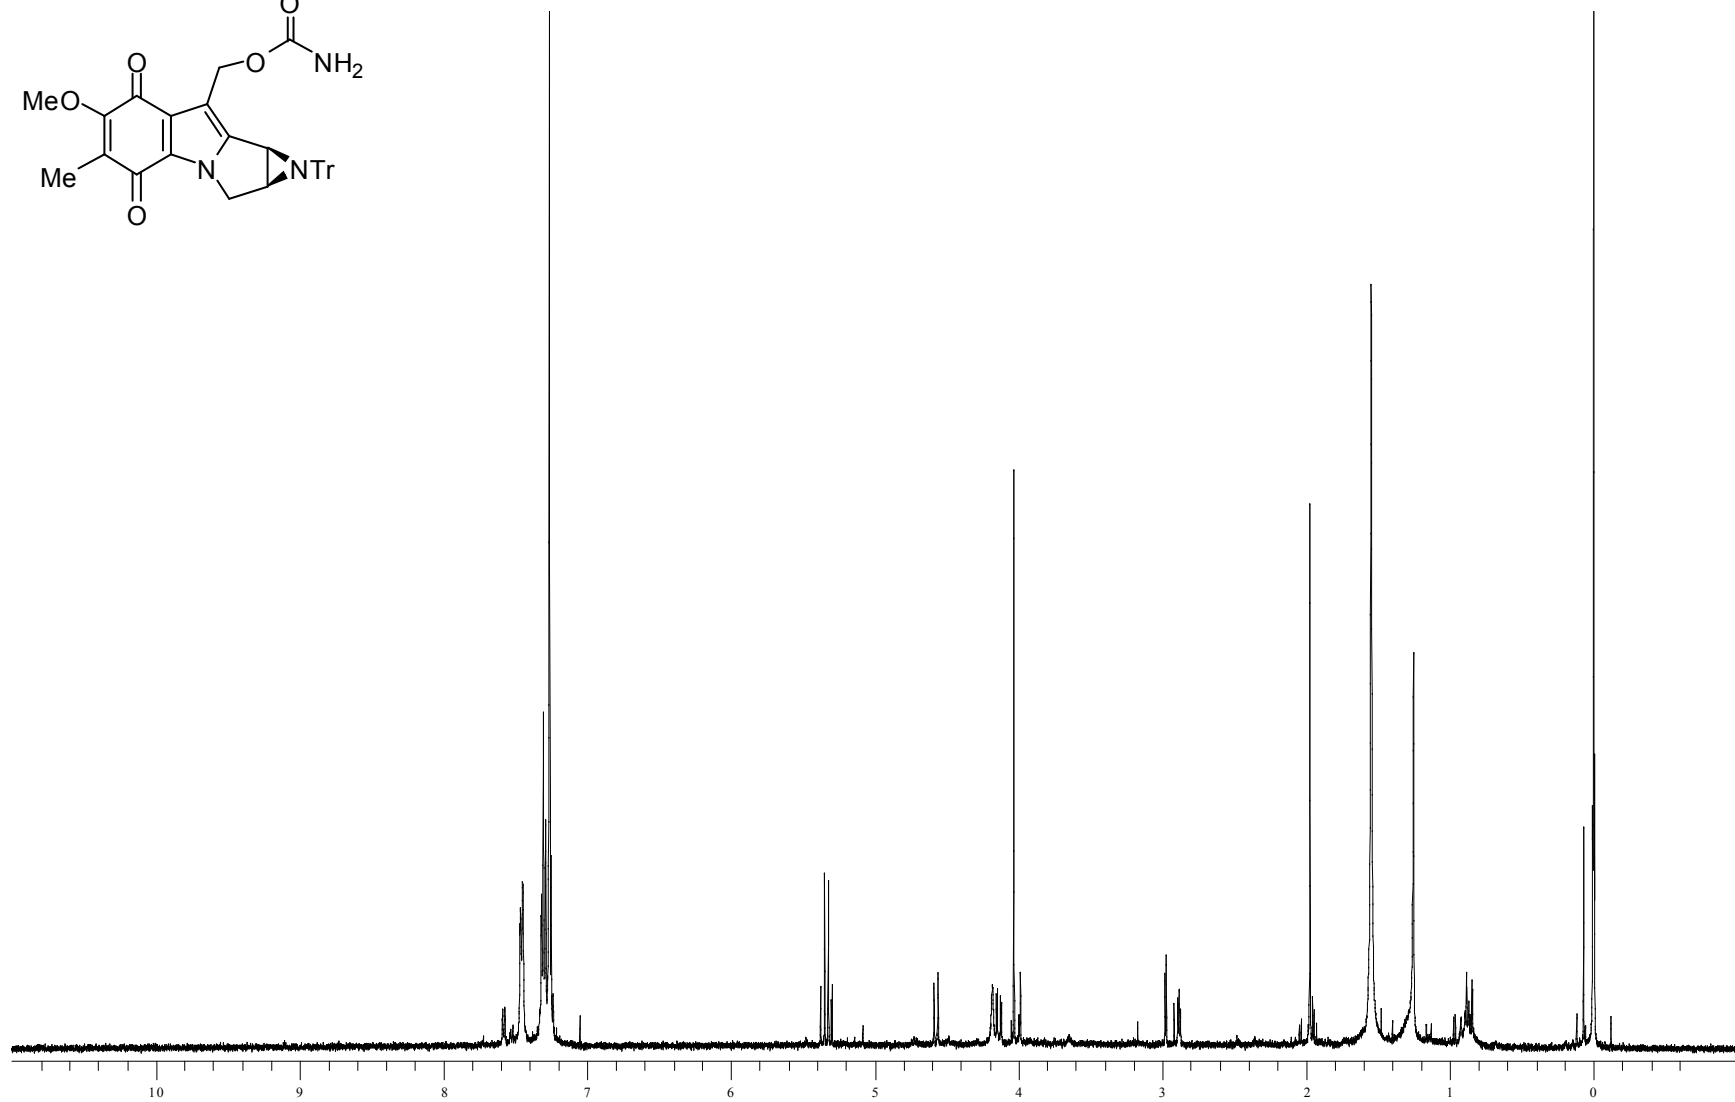

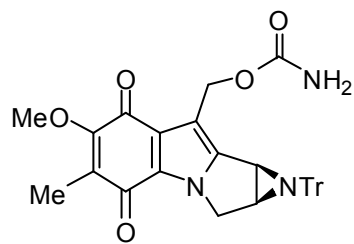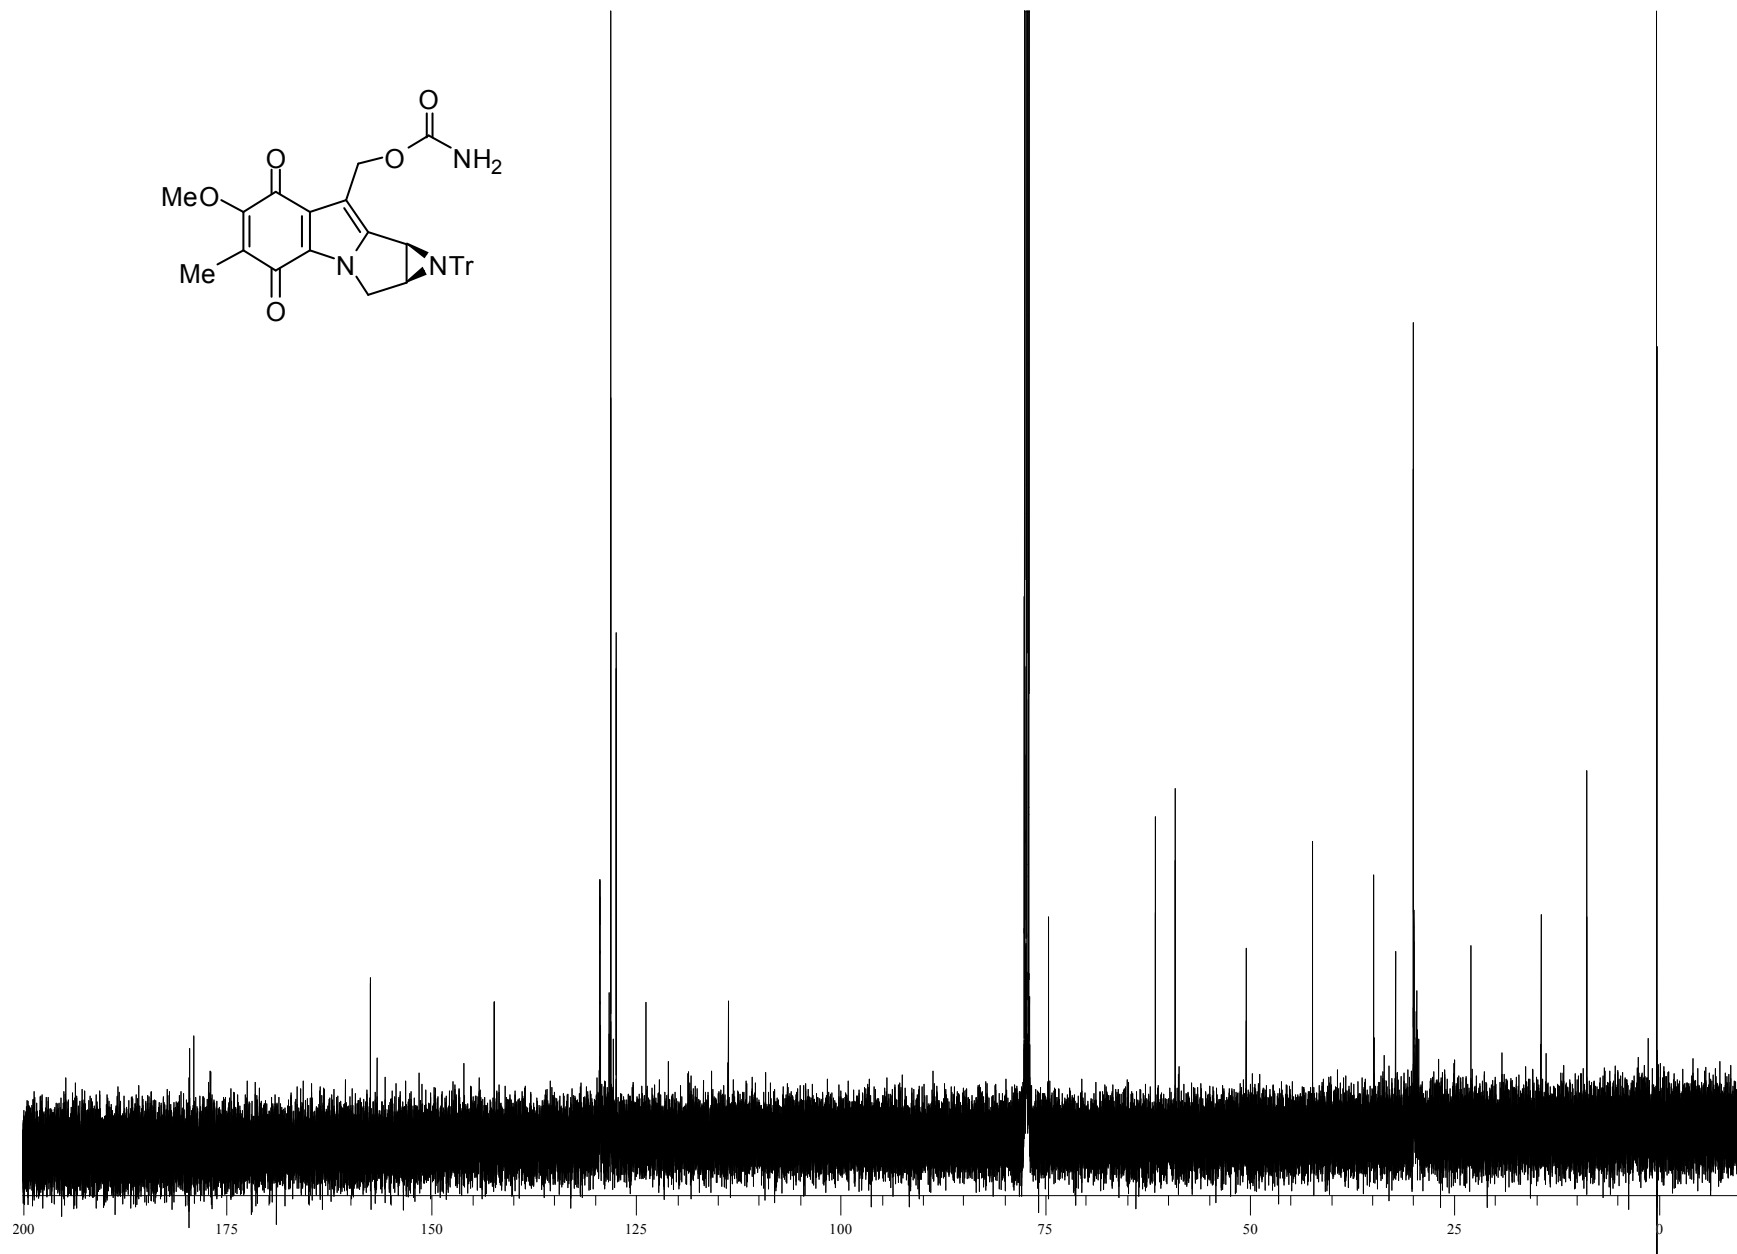

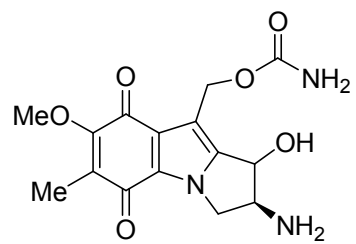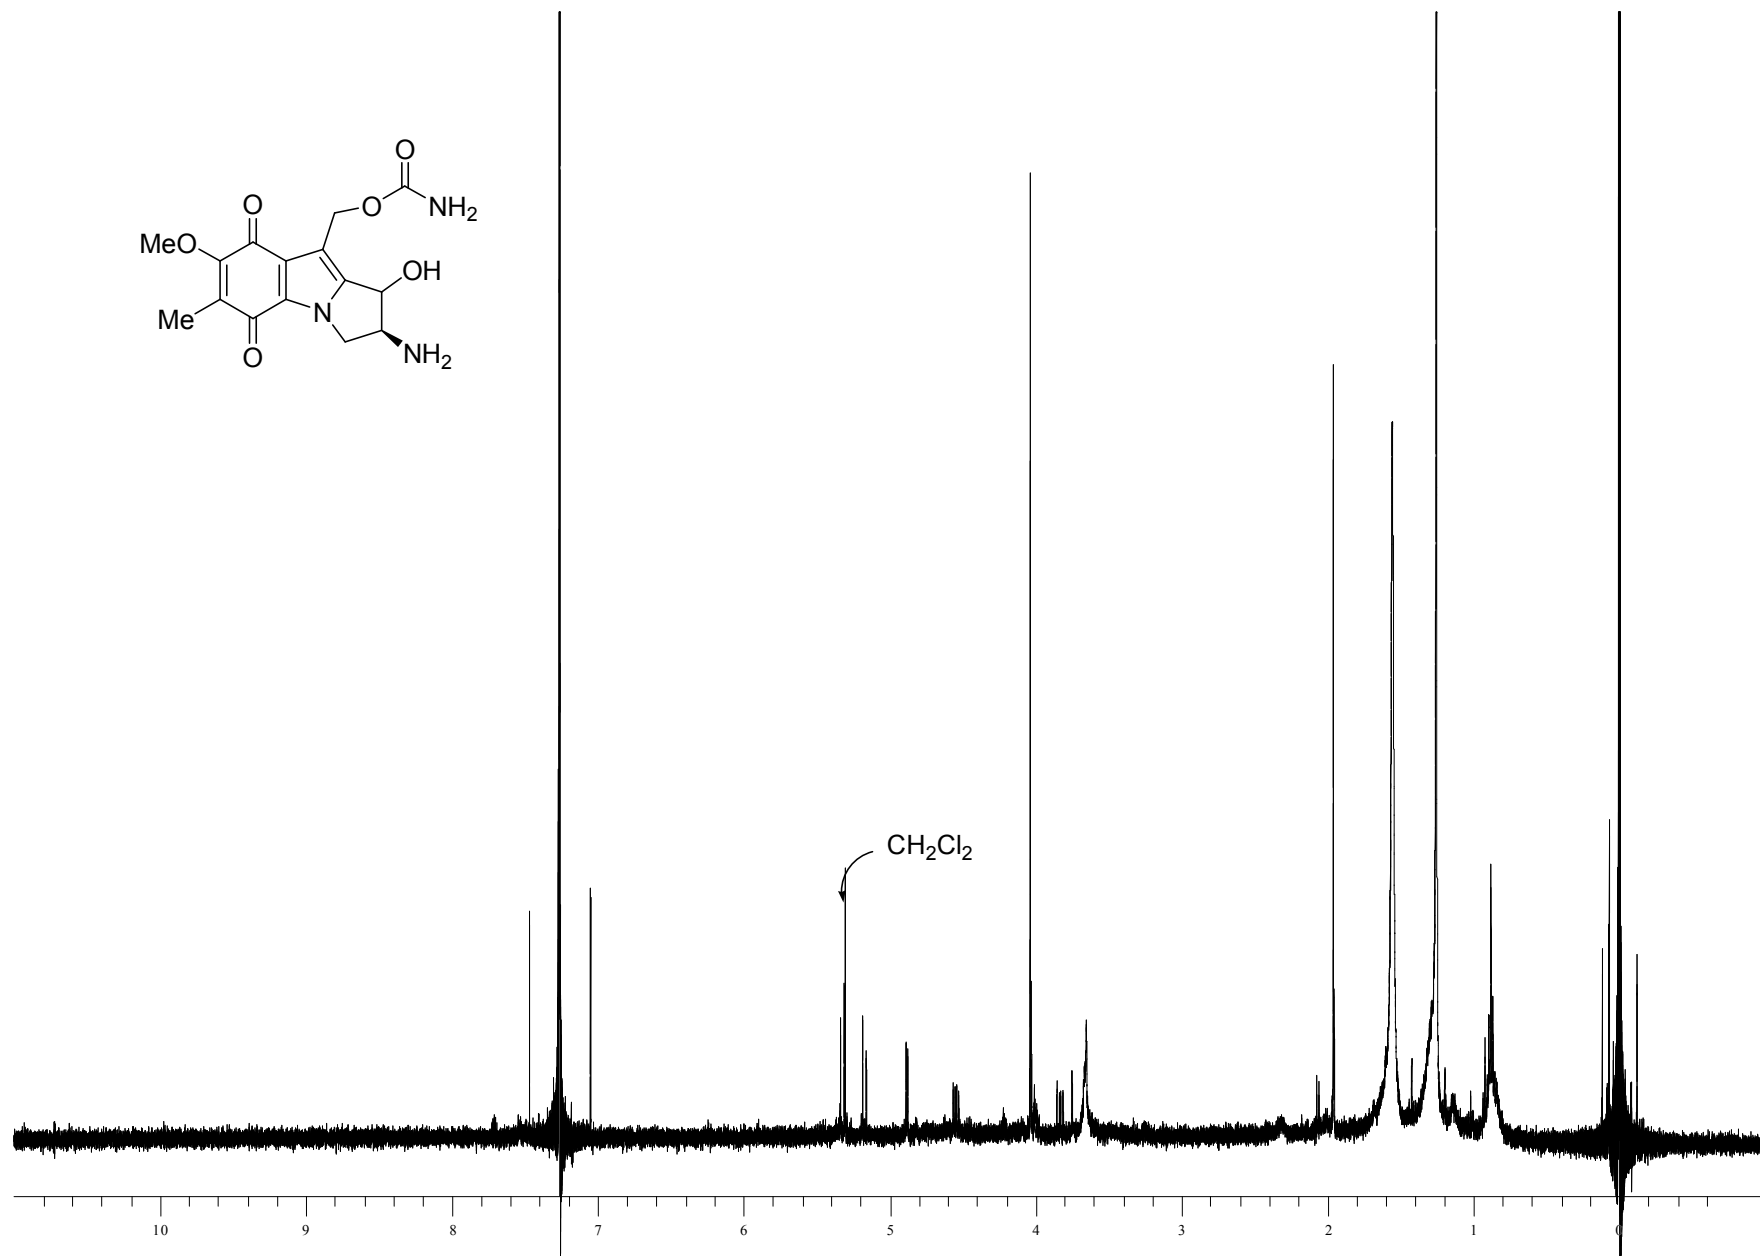



## Structure Determination.

Orange needles of quinone **55** were grown from a hexane/ethyl acetate solution at 25 °C. A crystal of dimensions 0.36 x 0.08 x 0.06 mm was mounted on a standard Bruker SMART 1K CCD-based X-ray diffractometer equipped with a LT-2 low temperature device and normal focus Mo-target X-ray tube ( $\lambda = 0.71073$  Å) operated at 2000 W power (50 kV, 40 mA). The X-ray intensities were measured at 108(2) K; the detector was placed at a distance 4.969 cm from the crystal. A total of 2513 frames were collected with a scan width of 0.5° in  $\omega$  and  $\phi$  with an exposure time of 90 s/frame. The integration of the data yielded a total of 20438 reflections to a maximum  $2\theta$  value of 33.10° of which 1081 were independent and 912 were greater than  $2\sigma(I)$ . The final cell constants (Table 1) were based on the xyz centroids of 2315 reflections above  $10\sigma(I)$ . Analysis of the data showed negligible decay during data collection; the data were processed with SADABS and corrected for absorption. The structure was solved and refined with the Bruker SHELXTL (version 6.12) software package, using the space group P2(1)2(1)2 with  $Z = 4$  for the formula  $C_{34}H_{29}N_3O_5 \cdot (C_6H_{14})_{0.5}$ . Due to the limited data, only nitrogen and oxygen atoms were refined anisotropically, all carbon atoms refined isotropically and the hydrogen atoms placed in idealized positions. Full matrix least-squares refinement based on  $F^2$  converged at  $R1 = 0.0928$  and  $wR2 = 0.2662$  [based on  $I > 2\sigma(I)$ ],  $R1 = 0.1054$  and  $wR2 = 0.2744$  for all data.

Sheldrick, G.M. SHELXTL, v. 6.12; Bruker Analytical X-ray, Madison, WI, 2001.

Sheldrick, G.M. SADABS, v. 2.10. Program for Empirical Absorption Correction of Area Detector Data, University of Gottingen: Gottingen, Germany, 2003.

Saint Plus, v. 7.01, Bruker Analytical X-ray, Madison, WI, 2003.

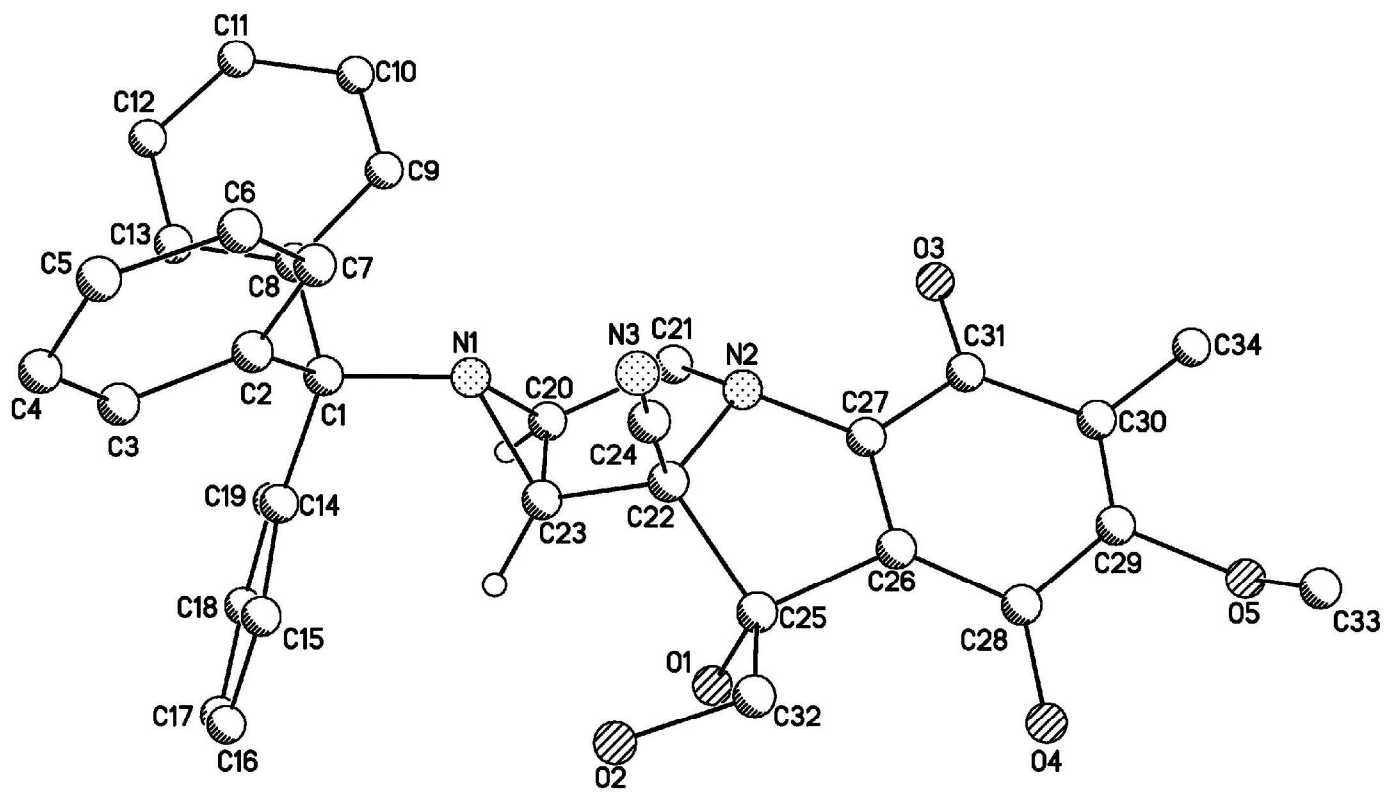

Table 1. Crystal data and structure refinement for quinone **55**.

|                             |                                                                                                     |
|-----------------------------|-----------------------------------------------------------------------------------------------------|
| Identification code         | quinone <b>55</b>                                                                                   |
| Empirical formula           | $C_{37} H_{36} N_3 O_5$                                                                             |
| Formula weight              | 602.69                                                                                              |
| Temperature                 | 108(2) K                                                                                            |
| Wavelength                  | 0.71073 Å                                                                                           |
| Crystal system, space group | Orthorhombic, P2(1)2(1)2                                                                            |
| Unit cell dimensions        | a = 32.158(9) Å    alpha = 90°.<br>b = 8.977(3) Å    beta = 90°.<br>c = 11.478(3) Å    gamma = 90°. |
| Volume                      | 3313.7(16) Å <sup>3</sup>                                                                           |
| Z, Calculated density       | 4, 1.208 Mg/m <sup>3</sup>                                                                          |
| Absorption coefficient      | 0.081 mm <sup>-1</sup>                                                                              |
| F(000)                      | 1276                                                                                                |
| Crystal size                | 0.34 x 0.04 x 0.02 mm                                                                               |
| θ range for data collection | 1.88 to 16.55°.                                                                                     |
| Limiting indices            | -25 ≤ h ≤ 25, -7 ≤ k ≤ 7, -9 ≤ l ≤ 9                                                                |

|                                      |                                       |
|--------------------------------------|---------------------------------------|
| Reflections collected / unique       | 20438 / 1081 [R(int) = 0.1692]        |
| Completeness to $\theta = 16.55$     | 99.7 %                                |
| Absorption correction                | Semi-empirical from equivalents       |
| Max. and min. transmission           | 0.9984 and 0.9731                     |
| Refinement method                    | Full-matrix least-squares on $F^2$    |
| Data / restraints / parameters       | 1081 / 0 / 212                        |
| Goodness-of-fit on $F^2$             | 1.339                                 |
| Final R indices [ $I > 2\sigma(I)$ ] | R1 = 0.0928, wR2 = 0.2662             |
| R indices (all data)                 | R1 = 0.1054, wR2 = 0.2744             |
| Absolute structure parameter         | -4(10)                                |
| Extinction coefficient               | 0.020(5)                              |
| Largest diff. peak and hole          | 0.509 and -0.319 e. $\text{\AA}^{-3}$ |

Table 2. Atomic coordinates ( $\times 10^4$ ) and equivalent isotropic displacement parameters ( $\text{\AA}^2 \times 10^3$ ) for quinone **55**.  $U(\text{eq})$  is defined as one third of the trace of the orthogonalized  $U_{ij}$  tensor.

|      | x       | y         | z        | $U(\text{eq})$ |
|------|---------|-----------|----------|----------------|
| O(1) | 2927(4) | 11679(14) | 9422(10) | 35(4)          |

|       |         |           |           |       |
|-------|---------|-----------|-----------|-------|
| O(2)  | 2470(4) | 9309(15)  | 10343(10) | 41(4) |
| O(3)  | 3521(4) | 11426(15) | 5336(12)  | 48(4) |
| O(4)  | 2104(4) | 12451(17) | 7486(12)  | 55(5) |
| O(5)  | 2177(4) | 13386(16) | 5253(12)  | 52(5) |
| N(1)  | 3824(5) | 8550(20)  | 9190(14)  | 41(5) |
| N(2)  | 3359(4) | 9975(17)  | 7441(12)  | 25(5) |
| N(3)  | 2857(5) | 6770(20)  | 8193(14)  | 40(5) |
| C(1)  | 4089(6) | 7870(20)  | 10170(17) | 30(6) |
| C(2)  | 3918(6) | 6360(20)  | 10462(18) | 31(6) |
| C(3)  | 3947(6) | 5750(20)  | 11572(19) | 36(6) |
| C(4)  | 3809(5) | 4330(20)  | 11806(19) | 34(6) |
| C(5)  | 3650(6) | 3480(20)  | 10886(18) | 40(6) |
| C(6)  | 3609(6) | 4100(30)  | 9810(20)  | 44(7) |
| C(7)  | 3750(6) | 5520(20)  | 9560(20)  | 47(7) |
| C(8)  | 4523(6) | 7620(20)  | 9688(18)  | 32(6) |
| C(9)  | 4623(7) | 7780(20)  | 8510(20)  | 52(7) |
| C(10) | 5010(8) | 7510(30)  | 8085(19)  | 59(7) |
| C(11) | 5317(7) | 6970(20)  | 8821(19)  | 48(7) |
| C(12) | 5224(6) | 6750(20)  | 9958(18)  | 42(7) |
| C(13) | 4833(6) | 7120(20)  | 10416(19) | 39(6) |
| C(14) | 4102(6) | 8980(20)  | 11262(17) | 33(6) |
| C(15) | 3764(7) | 9000(30)  | 12017(19) | 45(7) |
| C(16) | 3765(7) | 9930(20)  | 12955(18) | 44(6) |
| C(17) | 4087(6) | 10890(20) | 13098(19) | 45(7) |
| C(18) | 4410(7) | 10890(30) | 12290(19) | 51(7) |
| C(19) | 4428(6) | 9940(20)  | 11378(16) | 30(6) |
| C(20) | 3861(6) | 10060(30) | 8919(17)  | 35(6) |
| C(21) | 3786(6) | 10480(20) | 7696(17)  | 38(6) |
| C(22) | 3133(6) | 9390(20)  | 8530(18)  | 29(6) |
| C(23) | 3473(6) | 9540(20)  | 9434(19)  | 41(7) |
| C(24) | 2991(7) | 7920(30)  | 8335(18)  | 30(7) |
| C(25) | 2763(6) | 10530(20) | 8709(16)  | 25(6) |
| C(26) | 2719(6) | 11150(20) | 7416(15)  | 21(6) |
| C(27) | 3074(6) | 10860(20) | 6908(18)  | 33(6) |
| C(28) | 2419(7) | 12050(20) | 6919(19)  | 29(6) |

|       |         |           |          |       |
|-------|---------|-----------|----------|-------|
| C(29) | 2499(8) | 12540(30) | 5770(20) | 51(7) |
| C(30) | 2836(7) | 12390(20) | 5169(18) | 36(6) |
| C(31) | 3175(8) | 11560(20) | 5770(20) | 41(7) |
| C(32) | 2381(5) | 9870(20)  | 9222(16) | 26(6) |
| C(33) | 2930(6) | 13030(20) | 3967(18) | 51(7) |

---

Table 3. Bond lengths [ $\text{\AA}$ ] and angles [deg] for **55**.

---

|            |         |
|------------|---------|
| O(1)-C(25) | 1.42(2) |
| O(2)-C(32) | 1.41(2) |
| O(3)-C(31) | 1.23(2) |
| O(4)-C(28) | 1.26(2) |
| O(5)-C(33) | 1.38(2) |
| O(5)-C(29) | 1.42(3) |
| N(1)-C(20) | 1.40(3) |
| N(1)-C(23) | 1.47(2) |
| N(1)-C(1)  | 1.54(2) |
| N(2)-C(27) | 1.35(2) |
| N(2)-C(21) | 1.48(2) |
| N(2)-C(22) | 1.54(2) |
| N(3)-C(24) | 1.13(2) |
| C(1)-C(2)  | 1.50(3) |
| C(1)-C(8)  | 1.52(3) |
| C(1)-C(14) | 1.60(3) |
| C(2)-C(7)  | 1.39(3) |
| C(2)-C(3)  | 1.39(3) |
| C(3)-C(4)  | 1.38(2) |
| C(4)-C(5)  | 1.40(3) |
| C(5)-C(6)  | 1.36(3) |
| C(6)-C(7)  | 1.39(3) |
| C(8)-C(9)  | 1.40(3) |

|                  |           |
|------------------|-----------|
| C(8)-C(13)       | 1.38(2)   |
| C(9)-C(10)       | 1.36(3)   |
| C(10)-C(11)      | 1.39(3)   |
| C(11)-C(12)      | 1.35(3)   |
| C(12)-C(13)      | 1.40(2)   |
| C(14)-C(19)      | 1.37(2)   |
| C(14)-C(15)      | 1.39(3)   |
| C(15)-C(16)      | 1.36(3)   |
| C(16)-C(17)      | 1.36(3)   |
| C(17)-C(18)      | 1.39(3)   |
| C(18)-C(19)      | 1.35(2)   |
| C(20)-C(23)      | 1.45(3)   |
| C(20)-C(21)      | 1.47(3)   |
| C(22)-C(24)      | 1.41(3)   |
| C(22)-C(23)      | 1.51(3)   |
| C(22)-C(25)      | 1.59(3)   |
| C(25)-C(32)      | 1.49(2)   |
| C(25)-C(26)      | 1.59(3)   |
| C(26)-C(27)      | 1.31(2)   |
| C(26)-C(28)      | 1.38(2)   |
| C(27)-C(31)      | 1.48(3)   |
| C(28)-C(29)      | 1.41(3)   |
| C(29)-C(30)      | 1.29(3)   |
| C(30)-C(31)      | 1.49(3)   |
| C(30)-C(34)      | 1.53(3)   |
| C(33)-O(5)-C(29) | 114.7(17) |
| C(20)-N(1)-C(23) | 61.0(12)  |
| C(20)-N(1)-C(1)  | 120.2(17) |
| C(23)-N(1)-C(1)  | 121.9(15) |
| C(27)-N(2)-C(21) | 122.7(15) |
| C(27)-N(2)-C(22) | 104.4(15) |
| C(21)-N(2)-C(22) | 112.4(14) |
| C(2)-C(1)-C(8)   | 106.9(15) |
| C(2)-C(1)-N(1)   | 108.6(15) |
| C(8)-C(1)-N(1)   | 107.5(15) |

|                   |           |
|-------------------|-----------|
| C(2)-C(1)-C(14)   | 113.3(16) |
| C(8)-C(1)-C(14)   | 110.6(15) |
| N(1)-C(1)-C(14)   | 109.8(14) |
| C(7)-C(2)-C(3)    | 119.9(19) |
| C(7)-C(2)-C(1)    | 117.7(18) |
| C(3)-C(2)-C(1)    | 122.2(19) |
| C(4)-C(3)-C(2)    | 121(2)    |
| C(3)-C(4)-C(5)    | 118(2)    |
| C(6)-C(5)-C(4)    | 120(2)    |
| C(5)-C(6)-C(7)    | 122(2)    |
| C(2)-C(7)-C(6)    | 118(2)    |
| C(9)-C(8)-C(13)   | 117.1(19) |
| C(9)-C(8)-C(1)    | 123.2(18) |
| C(13)-C(8)-C(1)   | 119.5(17) |
| C(10)-C(9)-C(8)   | 122(2)    |
| C(9)-C(10)-C(11)  | 120(2)    |
| C(12)-C(11)-C(10) | 119(2)    |
| C(11)-C(12)-C(13) | 122(2)    |
| C(8)-C(13)-C(12)  | 120(2)    |
| C(19)-C(14)-C(15) | 122(2)    |
| C(19)-C(14)-C(1)  | 119.3(16) |
| C(15)-C(14)-C(1)  | 118.7(17) |
| C(16)-C(15)-C(14) | 120(2)    |
| C(17)-C(16)-C(15) | 119(2)    |
| C(16)-C(17)-C(18) | 119(2)    |
| C(19)-C(18)-C(17) | 123(2)    |
| C(18)-C(19)-C(14) | 116.4(19) |
| N(1)-C(20)-C(23)  | 61.9(14)  |
| N(1)-C(20)-C(21)  | 116.6(19) |
| C(23)-C(20)-C(21) | 109.2(17) |
| N(2)-C(21)-C(20)  | 105.2(16) |
| C(24)-C(22)-C(23) | 115.3(17) |
| C(24)-C(22)-N(2)  | 110.0(17) |
| C(23)-C(22)-N(2)  | 100.7(15) |
| C(24)-C(22)-C(25) | 112.5(17) |



|                   |           |
|-------------------|-----------|
| C(23)-C(22)-C(25) | 113.2(17) |
| N(2)-C(22)-C(25)  | 103.8(15) |
| C(20)-C(23)-N(1)  | 57.1(13)  |
| C(20)-C(23)-C(22) | 111.7(18) |
| N(1)-C(23)-C(22)  | 111.6(17) |
| N(3)-C(24)-C(22)  | 176(2)    |
| O(1)-C(25)-C(32)  | 111.8(15) |
| O(1)-C(25)-C(22)  | 105.3(14) |
| C(32)-C(25)-C(22) | 114.3(16) |
| O(1)-C(25)-C(26)  | 108.8(14) |
| C(32)-C(25)-C(26) | 115.8(15) |
| C(22)-C(25)-C(26) | 99.8(14)  |
| C(27)-C(26)-C(28) | 123(2)    |
| C(27)-C(26)-C(25) | 105.7(17) |
| C(28)-C(26)-C(25) | 130.6(17) |
| C(26)-C(27)-N(2)  | 120.2(19) |
| C(26)-C(27)-C(31) | 120(2)    |
| N(2)-C(27)-C(31)  | 119.9(19) |
| O(4)-C(28)-C(26)  | 121.0(19) |
| O(4)-C(28)-C(29)  | 123(2)    |
| C(26)-C(28)-C(29) | 116(2)    |
| C(30)-C(29)-C(28) | 128(2)    |
| C(30)-C(29)-O(5)  | 117(2)    |
| C(28)-C(29)-O(5)  | 115(2)    |
| C(29)-C(30)-C(31) | 115(2)    |
| C(29)-C(30)-C(34) | 127(2)    |
| C(31)-C(30)-C(34) | 117.8(19) |
| O(3)-C(31)-C(30)  | 121(2)    |
| O(3)-C(31)-C(27)  | 121(2)    |
| C(30)-C(31)-C(27) | 118(2)    |
| O(2)-C(32)-C(25)  | 109.8(15) |

---

Symmetry transformations used to generate equivalent atoms:

Table 4. Anisotropic displacement parameters ( $\text{Å}^2 \times 10^3$ ) for quinone **55**. The anisotropic displacement factor exponent takes the form:  $-2 \pi^2 [ h^2 a^{*2} U_{11} + \dots + 2 h k a^* b^* U_{12} ]$

|      | U11    | U22    | U33    | U23    | U13    | U12     |
|------|--------|--------|--------|--------|--------|---------|
| O(1) | 41(8)  | 34(9)  | 30(9)  | -16(8) | -4(7)  | 9(8)    |
| O(2) | 32(8)  | 56(11) | 35(10) | 6(9)   | -1(7)  | 8(8)    |
| O(3) | 44(10) | 51(10) | 47(9)  | -4(8)  | 15(9)  | 12(8)   |
| O(4) | 36(10) | 82(12) | 46(10) | 1(10)  | -4(9)  | 6(10)   |
| O(5) | 46(10) | 57(11) | 52(10) | -3(9)  | 9(9)   | -8(9)   |
| N(1) | 23(11) | 67(15) | 34(12) | 17(12) | -2(9)  | 3(10)   |
| N(2) | 18(10) | 29(10) | 27(11) | 7(10)  | 7(8)   | -1(9)   |
| N(3) | 36(12) | 37(14) | 46(13) | 3(11)  | -5(10) | -15(11) |

Table 5. Hydrogen coordinates ( $\times 10^4$ ) and isotropic displacement parameters ( $\text{Å}^2 \times 10^3$ ) for quinone **64**.

|       | x    | y     | z     | U(eq) |
|-------|------|-------|-------|-------|
| H(1A) | 2767 | 12419 | 9407  | 52    |
| H(2A) | 2655 | 8652  | 10295 | 61    |
| H(3A) | 4063 | 6333  | 12183 | 43    |
| H(4A) | 3822 | 3933  | 12573 | 41    |
| H(5A) | 3570 | 2477  | 11013 | 48    |
| H(6A) | 3480 | 3537  | 9206  | 53    |
| H(7A) | 3733 | 5917  | 8794  | 56    |
| H(9A) | 4412 | 8093  | 7980  | 62    |

|        |      |       |       |    |
|--------|------|-------|-------|----|
| H(10A) | 5070 | 7684  | 7287  | 71 |
| H(11A) | 5588 | 6763  | 8533  | 58 |
| H(12A) | 5428 | 6328  | 10457 | 50 |
| H(13A) | 4783 | 7034  | 11229 | 47 |
| H(15A) | 3532 | 8370  | 11879 | 54 |
| H(16A) | 3543 | 9905  | 13502 | 53 |
| H(17A) | 4091 | 11555 | 13742 | 54 |
| H(18A) | 4629 | 11595 | 12385 | 61 |
| H(19A) | 4654 | 9947  | 10846 | 36 |
| H(20A) | 4051 | 10689 | 9399  | 42 |
| H(21A) | 3811 | 11570 | 7595  | 46 |
| H(21B) | 3989 | 9981  | 7175  | 46 |
| H(23A) | 3402 | 9812  | 10256 | 49 |
| H(32A) | 2160 | 10635 | 9274  | 31 |
| H(32B) | 2279 | 9054  | 8716  | 31 |
| H(33A) | 1887 | 11802 | 4439  | 91 |
| H(33B) | 1612 | 13260 | 4667  | 91 |
| H(33C) | 1712 | 12142 | 5716  | 91 |
| H(34A) | 2704 | 13699 | 3734  | 77 |
| H(34B) | 2954 | 12216 | 3401  | 77 |
| H(34C) | 3192 | 13584 | 3995  | 77 |

---

Table 6. Hydrogen bonds for quinone **55** [ $\text{\AA}$  and  $^\circ$ ].

---

| D-H...A             | d(D-H) | d(H...A) | d(D...A)  | $\angle(\text{DHA})$ |
|---------------------|--------|----------|-----------|----------------------|
| O(1)-H(1A)...O(2)#1 | 0.84   | 1.88     | 2.697(18) | 163.2                |
| O(2)-H(2A)...O(4)#2 | 0.84   | 2.87     | 3.297(18) | 113.3                |

---

Symmetry transformations used to generate equivalent atoms:

#1  $-x+1/2, y+1/2, -z+2$  #2  $-x+1/2, y-1/2, -z+2$

## **Selected experimental procedures;**

### **Oxidation of 32 with KHMDS and NCS**

A solution of silyl ether **32** (11.6 mg, 0.0214 mmol) in THF (0.7 mL) was cooled to -78 °C and KHMDS (0.32 mL of a 0.133 M solution in THF, 0.0428 mmol) was added. The yellow-green solution was stirred at -78 °C for 10 min then NCS (0.37 mL of a 0.115 M solution in THF, 0.0428 mmol) added. The now orange solution was stirred at -78 °C for an additional 10 min then the cooling bath was removed and the orange solution was poured into saturated aqueous sodium bicarbonate and extracted with Et<sub>2</sub>O. The combined organic extracts were dried (MgSO<sub>4</sub>), filtered, and solvents were removed (aspirator). The orange oil was purified by preparative TLC on silica gel (20 cm X 20 cm X 1000 μm, 20% EtOAc/hexanes eluent) to give 6.5 mg (72%) of indoloquinone **31**.

### **Oxidation of 32 with DBU and NCS**

To a solution of NCS (0.37 mL of a 0.115 M solution in THF, 0.0420 mmol) in THF (0.4 mL) cooled to -78 °C was added DBU (6 μL, 0.0420 mmol) and a solution of silyl ether **32** (11.4 mg, 0.0210 mmol) in THF (0.7 mL including flask and cannula washings) via cannula dropwise over 1 min. The light orange solution was warmed to 0 °C over 10 min and stirred an additional 10 min. The usual workup and purification by preparative TLC gave 7.6 mg (84%) of indoloquinone **31** and 1.9 mg of the starting silyl ether **32** (16%).

### **Oxidation of 32 with KHMDS and PhSeCl**

A solution of silyl ether **32** (12.0 mg, 0.0221 mmol) in THF (0.7 mL) was cooled to -78 °C and KHMDS (0.33 mL of a 0.133 M solution in THF, 0.0443 mmol) was added. The yellow solution was stirred at -78 °C for 10 min then PhSeCl (8.5 mg in 0.2 mL THF, 0.044 mmol) added. The now orange solution was stirred at -78 °C for an additional 10 min then the cooling bath was removed. The usual workup and purification by preparative TLC gave 6.7 mg (74%) of indoloquinone **31**.

### **Oxidation of 32 with Phosphazene and NCS**

To a solution of NCS (0.35 mL of a 0.115 M solution in THF, 0.0406 mmol) in THF (0.4 mL) cooled to -78 °C was added phosphazene base P<sub>1</sub>-*t*-butyl (10 μL, 0.0406 mmol). A solution of silyl ether **32** (11.0 mg, 0.0203 mmol) in THF (0.6 mL including flask and cannula washings) was added via cannula dropwise over 1 min. The light orange solution was warmed to 0 °C over 10 min and stirred an additional 30 min and then warmed to rt over 30 min and stirred an additional 12 h. The usual workup and purification by preparative TLC gave 4.8 mg (56%) of indoloquinone **31** and 4.1 mg (37%) of the starting silyl ether **32**.

### **Oxidation of 32 with KHMDS and PhI(OAc)<sub>2</sub>**

A solution of silyl ether **32** (9.2 mg, 0.017 mmol) in THF (0.7 mL) was cooled to -78 °C and KHMDS (0.26 mL of a 0.133 M solution in THF, 0.034 mmol) was added. The yellow solution was stirred at -78 °C for 10 min then PhI(OAc)<sub>2</sub> (0.30 mL of a 0.113 M solution in THF, 0.034 mmol) was added. The light-orange solution was stirred at -78 °C for an additional 30 min then warmed to rt and stirred an additional 30 min. The usual workup and purification by preparative TLC gave 4.8 mg (69%) of indoloquinone **31**.
